# Supplementary material for: Two-Component Elements Mediate Interactions between Cytokinin and Salicylic Acid in Plant Immunity
Source: PubMed Central journal article supplement (PMC3266875; doi:10.1371/journal.pgen.1002448), 2012-01-26
Supplement: pgen.1002448.s001.pdf [file pgen.1002448.s001.pdf]

**Table 1 S1**

**Table 1 Supporting Information:** Expression levels of genes regulated by treatment with *Hyaloperonospora arabidopsidis* isolate Noco2 (*Hpa*) on wild-type (Col-0) and *arr3,4,5,6,8,9* mutant plants, 3 days after water or *Hpa* Noco2 treatment. Samples were normalized to water-treated wild-type (Col-0) samples. Average of technical replicates is shown.

| Probe Set ID | AGI       | p-value  | [Col, Noco](normalized) | [Col, water](normalized) | [arr345689, Noco](normalized) | [arr345689, water](normalized) |
|--------------|-----------|----------|-------------------------|--------------------------|-------------------------------|--------------------------------|
| 261585_at    | AT1G01010 | 1.94E-03 | 0.85521555              | 0.00000000               | 0.80082130                    | -0.16989780                    |
| 261025_at    | AT1G01225 | 3.86E-03 | -0.26118088             | -0.00000024              | -0.34199238                   | 0.14129782                     |
| 261027_at    | AT1G01340 | 3.94E-04 | 2.18104740              | -0.00000024              | 1.67296390                    | -0.30774070                    |
| 259428_at    | AT1G01560 | 1.61E-04 | 2.37648530              | 0.00000000               | 2.53437760                    | 0.23138785                     |
| 261537_at    | AT1G01800 | 3.74E-03 | 0.40875626              | -0.00000048              | 0.43995857                    | 0.08397818                     |
| 261652_at    | AT1G01860 | 3.45E-03 | -0.69661117             | 0.00000024               | -0.42923070                   | -0.02835441                    |
| 261624_at    | AT1G02000 | 3.52E-03 | -0.28773284             | 0.00000000               | -0.31586170                   | -0.18896079                    |
| 264178_at    | AT1G02170 | 3.77E-04 | 1.13947820              | 0.00000000               | 0.90529010                    | -0.06098843                    |
| 264123_at    | AT1G02270 | 8.41E-04 | 0.60719633              | -0.00000048              | 0.69164990                    | 0.00085306                     |
| 259443_at    | AT1G02360 | 6.56E-05 | 2.55904480              | 0.00000000               | 2.38492870                    | -0.06808567                    |
| 260904_at    | AT1G02450 | 1.40E-03 | 2.82095480              | -0.00000024              | 2.73717400                    | 0.10011983                     |
| 264355_at    | AT1G03210 | 3.15E-04 | 0.90639780              | -0.00000048              | 0.92998743                    | -0.10366297                    |
| 264362_at    | AT1G03290 | 3.84E-03 | 1.71733710              | 0.00000024               | 1.56455420                    | 0.12723780                     |
| 264821_at    | AT1G03470 | 4.09E-03 | -0.45647573             | -0.00000024              | -0.33193707                   | 0.06802622                     |
| 264837_at    | AT1G03600 | 2.31E-03 | -0.65869856             | -0.00000048              | -0.64146040                   | 0.11020565                     |
| 264832_at    | AT1G03660 | 1.39E-04 | 0.90469766              | -0.00000024              | 0.95159435                    | -0.22140527                    |
| 265043_at    | AT1G03900 | 2.10E-03 | 0.57276010              | 0.00000000               | 0.46913147                    | -0.00178003                    |
| 263664_at    | AT1G04250 | 4.03E-04 | -0.39984750             | -0.00000048              | -0.16465855                   | 0.56829550                     |
| 261177_at    | AT1G04770 | 1.11E-03 | 1.12914510              | -0.00000024              | 0.61855700                    | 0.20370865                     |
| 261167_at    | AT1G04980 | 4.22E-03 | 2.17855830              | 0.00000024               | 2.24483300                    | 0.61192894                     |
| 264570_at    | AT1G05350 | 1.54E-03 | 0.87294006              | 0.00000000               | 0.87528800                    | 0.22029924                     |
| 263183_at    | AT1G05570 | 1.53E-03 | 1.20271640              | 0.00000000               | 1.05133720                    | 0.04416561                     |
| 263202_at    | AT1G05630 | 3.50E-03 | 1.00109360              | 0.00000000               | 0.87684274                    | -0.06990385                    |
| 260790_at    | AT1G06240 | 1.73E-03 | -0.59802914             | 0.00000000               | -0.48663210                   | -0.06850004                    |
| 260789_s_at  | AT1G06290 | 2.48E-03 | 2.48E-03                | 0.00000000               | 0.44253350                    | -0.04366779                    |
| 256050_at    | AT1G07000 | 2.44E-03 | 2.01048040              | 0.00000000               | 1.77894690                    | -0.02440000                    |
| 256042_at    | AT1G07220 | 3.85E-03 | 0.49965740              | -0.00000024              | 0.62631510                    | -0.29318118                    |
| 261078_at    | AT1G07320 | 2.68E-03 | -0.70131636             | -0.00000048              | -0.54464674                   | 0.30119990                     |
| 261084_at    | AT1G07440 | 4.42E-04 | -1.38886240             | 0.00000048               | -1.36510560                   | 0.25605917                     |
| 261433_s_at  | AT1G07670 | 9.99E-04 | 0.59288740              | -0.00000048              | 0.52223635                    | 0.01580334                     |
| 261412_at    | AT1G07890 | 8.08E-04 | 0.81300070              | -0.00000048              | 0.97359990                    | 0.20243263                     |
| 260677_at    | AT1G07910 | 2.87E-03 | -0.23078942             | 0.00000000               | -0.32528900                   | -0.20975160                    |
| 260648_at    | AT1G08050 | 1.01E-04 | 2.44425920              | 0.00000024               | 2.30706500                    | -0.30804467                    |
| 261758_at    | AT1G08250 | 2.43E-03 | 0.48619175              | -0.00000024              | 0.14739728                    | 0.12238836                     |
| 261692_at    | AT1G08450 | 9.65E-04 | 2.00418570              | 0.00000000               | 2.18925380                    | 0.14712429                     |
| 261695_at    | AT1G08520 | 3.97E-03 | -0.58549260             | 0.00000000               | -0.59361270                   | 0.01084995                     |
| 264781_at    | AT1G08540 | 1.66E-03 | -0.66344595             | 0.00000000               | -0.45069790                   | 0.24077749                     |
| 264645_at    | AT1G08940 | 1.10E-03 | 1.42764120              | 0.00000024               | 1.25415400                    | 0.04899836                     |
| 264648_at    | AT1G09080 | 2.68E-04 | 3.66404960              | 0.00000000               | 3.94452380                    | 0.68302417                     |
| 264657_at    | AT1G09100 | 7.09E-04 | 0.92995740              | 0.00000000               | 0.88891315                    | 0.28737593                     |
| 263676_at    | AT1G09340 | 2.15E-03 | -0.49084760             | 0.00000000               | -0.56875896                   | 0.13103485                     |
| 264708_at    | AT1G09740 | 1.38E-03 | 0.99140070              | 0.00000000               | 0.87587740                    | 0.02080464                     |
| 264672_at    | AT1G09750 | 2.75E-03 | -0.74792814             | -0.00000048              | -0.54961777                   | 0.11661243                     |
| 264522_at    | AT1G10050 | 8.10E-04 | 0.80614567              | 0.00000000               | 0.73260950                    | -0.13712406                    |
| 264406_at    | AT1G10290 | 1.15E-03 | 0.65940475              | 0.00000000               | 0.60747340                    | 0.08022046                     |
| 264434_at    | AT1G10340 | 1.56E-03 | 2.36502980              | 0.00000024               | 2.31395000                    | -0.02264595                    |
| 264458_at    | AT1G10410 | 1.22E-03 | 1.06607530              | -0.00000024              | 1.02685140                    | 0.26519752                     |
| 263237_at    | AT1G10610 | 2.38E-03 | -0.32214737             | -0.00000024              | -0.33020425                   | -0.27833652                    |
| 262784_at    | AT1G10760 | 2.02E-03 | -1.07923360             | 0.00000048               | -0.96624900                   | 0.00316811                     |
| 260465_at    | AT1G10910 | 3.61E-03 | -1.03661420             | -0.00000048              | -1.14904710                   | -0.41659070                    |
| 264883_s_at  | AT1G11180 | 1.23E-03 | 1.31301070              | 0.00000000               | 1.36095710                    | 0.20506573                     |
| 262455_at    | AT1G11310 | 9.48E-05 | 0.81270410              | 0.00000000               | 0.75828170                    | -0.21220780                    |
| 262507_at    | AT1G11330 | 4.06E-04 | 1.26619050              | 0.00000000               | 1.06372360                    | -0.14517832                    |
| 262809_at    | AT1G11720 | 2.55E-03 | -0.94149256             | 0.00000000               | -0.93094160                   | 0.04101658                     |
| 264371_at    | AT1G12090 | 1.48E-04 | -0.61483290             | -0.00000048              | -0.79536104                   | -0.04718781                    |
| 260993_at    | AT1G12140 | 3.85E-04 | 0.26109362              | 0.00000000               | 0.22568798                    | -0.15602350                    |
| 261023_at    | AT1G12200 | 4.12E-04 | 0.96569157              | 0.00000000               | 0.86688757                    | 0.19918370                     |
| 260966_at    | AT1G12220 | 2.15E-03 | 0.33824062              | 0.00000024               | 0.28015804                    | -0.13855100                    |
| 259534_at    | AT1G12290 | 9.39E-05 | 1.73625710              | -0.00000024              | 1.70564700                    | 0.05043483                     |
| 259512_at    | AT1G12360 | 2.66E-03 | 0.81285380              | 0.00000000               | 0.67197990                    | -0.04601955                    |
| 259531_at    | AT1G12460 | 2.35E-03 | -0.43921710             | 0.00000000               | -0.65478900                   | -0.18885326                    |
| 255933_at    | AT1G12750 | 5.09E-04 | -0.14999819             | 0.00000000               | -0.22826529                   | -0.09628010                    |
| 261196_at    | AT1G12860 | 7.70E-04 | -1.08298640             | -0.00000048              | -1.27289490                   | -0.04137945                    |
| 261197_at    | AT1G12900 | 5.86E-04 | -0.37082052             | 0.00000000               | -0.40905428                   | 0.12289095                     |
| 259385_at    | AT1G13470 | 1.63E-03 | 3.39107280              | 0.00000000               | 3.38701150                    | 0.22159982                     |
| 259420_at    | AT1G13900 | 7.98E-04 | 0.18923998              | -0.00000048              | 0.26809692                    | 0.05797625                     |
| 262648_at    | AT1G14030 | 7.93E-04 | -0.72988080             | -0.00000048              | -0.74988030                   | 0.25549412                     |
| 262665_at    | AT1G14070 | 8.15E-04 | 0.70647620              | 0.00000000               | 0.38141537                    | 0.01809692                     |
| 262612_at    | AT1G14150 | 1.59E-03 | -1.28534170             | 0.00000000               | -1.41908450                   | 0.05043316                     |
| 262661_s_at  | AT1G14230 | 1.42E-03 | -0.60943220             | -0.00000048              | -0.79329440                   | 0.24977780                     |
| 261483_at    | AT1G14270 | 2.06E-03 | -0.36282730             | 0.00000048               | -0.40709448                   | 0.11260510                     |
| 261488_at    | AT1G14345 | 6.78E-04 | -1.03355930             | -0.00000048              | -1.20146850                   | -0.04803133                    |
| 261485_at    | AT1G14360 | 2.70E-03 | 1.87320660              | -0.00000048              | 1.71694800                    | 0.25743198                     |
| 261526_at    | AT1G14370 | 1.37E-03 | 1.52531050              | 0.00000000               | 1.30695820                    | -0.05459833                    |
| 261474_at    | AT1G14540 | 4.95E-04 | 0.48597026              | 0.00000000               | 0.68178964                    | -0.26703262                    |
| 262842_at    | AT1G14720 | 2.95E-03 | -0.90271140             | -0.00000048              | -0.62551310                   | -0.11852121                    |
| 262886_at    | AT1G14760 | 2.91E-03 | -0.42787194             | 0.00000024               | -0.23759246                   | -0.18410850                    |
| 262847_at    | AT1G14840 | 2.26E-03 | -0.63019300             | 0.00000024               | -0.69970465                   | -0.04323149                    |
| 262832_s_at  | AT1G14870 | 4.07E-03 | 2.48643640              | 0.00000000               | 2.39984460                    | 0.25070380                     |
| 262588_at    | AT1G15130 | 7.34E-04 | 0.42671728              | 0.00000048               | 0.39407873                    | -0.14976883                    |
| 262598_at    | AT1G15260 | 1.76E-03 | -1.23437980             | 0.00000000               | -1.46355300                   | -0.06957388                    |
| 259489_at    | AT1G15790 | 4.00E-05 | 2.03247800              | 0.00000000               | 1.87106160                    | -0.07712030                    |
| 261788_at    | AT1G15980 | 1.40E-03 | -0.97471430             | 0.00000000               | -1.12446170                   | 0.02079010                     |
| 261793_at    | AT1G16080 | 1.46E-03 | -0.75141525             | 0.00000000               | -0.79370785                   | -0.04633379                    |

|             |              |          |             |             |             |             |
|-------------|--------------|----------|-------------|-------------|-------------|-------------|
| 261836_at   | AT1G16090    | 8.35E-04 | 1.49299500  | 0.00000024  | 1.18765950  | 0.16229415  |
| 262753_at   | AT1G16340    | 4.62E-04 | -0.47847510 | 0.00000024  | -0.46093154 | 0.22661924  |
| 262731_at   | AT1G16420    | 7.68E-05 | 2.35423870  | 0.00000000  | 1.94711950  | -0.03812552 |
| 262716_at   | AT1G16470    | 2.26E-03 | 0.91914177  | 0.00000000  | 0.98971270  | 0.27498530  |
| 246327_at   | AT1G16670    | 7.18E-04 | 1.19293790  | -0.00000024 | 1.22050860  | 0.02494955  |
| 264303_s_at | AT1G16890 /  | 1.97E-03 | 0.70074270  | 0.00000048  | 0.64893055  | 0.22133780  |
| 256112_at   | AT1G16920    | 3.07E-03 | -0.37240458 | -0.00000048 | -0.33205032 | 0.05280447  |
| 262481_at   | AT1G17080    | 6.55E-04 | 0.69455480  | 0.00000048  | 0.62757490  | -0.08975363 |
| 262519_at   | AT1G17160    | 1.79E-04 | 0.17064810  | -0.00000048 | 0.07069969  | -0.13502693 |
| 262529_at   | AT1G17250    | 1.61E-03 | 0.56366300  | 0.00000000  | 0.40670037  | -0.29823947 |
| 261032_at   | AT1G17430    | 5.13E-04 | 1.03680900  | 0.00000024  | 0.92032910  | -0.22115517 |
| 260735_at   | AT1G17610    | 3.53E-03 | 0.52030730  | 0.00000000  | 0.57213520  | -0.43331242 |
| 256076_at   | AT1G18060    | 3.38E-04 | -0.98777580 | 0.00000048  | -0.89577150 | 0.16075230  |
| 261661_at   | AT1G18360    | 2.06E-03 | -0.72037363 | 0.00000000  | -0.70313025 | 0.26401280  |
| 261669_at   | AT1G18490    | 2.29E-03 | -0.46839952 | -0.00000048 | -0.26372170 | 0.03462360  |
| 255779_at   | AT1G18650    | 3.73E-04 | -1.46237830 | 0.00000000  | -1.40530780 | -0.09546614 |
| 261422_at   | AT1G18730    | 4.33E-04 | -0.63289260 | 0.00000000  | -0.86679410 | 0.16316843  |
| 261428_at   | AT1G18870    | 3.68E-03 | -0.78407574 | -0.00000024 | -0.61133430 | 0.07175160  |
| 259479_at   | AT1G19020    | 1.28E-03 | 2.59476100  | 0.00000048  | 2.46105050  | -0.14321160 |
| 256015_at   | AT1G19150    | 1.14E-04 | -1.16162060 | 0.00000000  | -1.19731380 | 0.29508696  |
| 256012_at   | AT1G19250    | 4.16E-04 | 4.97618700  | 0.00000000  | 4.55764600  | 0.43474483  |
| 260666_at   | AT1G19300    | 3.59E-03 | 1.28641560  | 0.00000024  | 1.18269110  | 0.14874315  |
| 260665_at   | AT1G19360    | 6.14E-04 | 1.05855940  | -0.00000048 | 0.91046620  | 0.07799196  |
| 260656_at   | AT1G19380    | 1.93E-03 | 1.28281690  | 0.00000000  | 0.66042614  | -0.51823710 |
| 261149_s_at | AT1G19550 /  | 3.65E-03 | -0.35571860 | -0.00000048 | -0.22065449 | 0.29462670  |
| 255782_at   | AT1G19850    | 2.35E-03 | -0.58261060 | -0.00000024 | -0.25922847 | 0.06290054  |
| 261248_at   | AT1G20030    | 5.18E-04 | -1.49843360 | -0.00000048 | -1.47031470 | 0.15540266  |
| 255941_at   | AT1G20350    | 1.85E-03 | 0.57131696  | 0.00000000  | 0.72179890  | -0.28532028 |
| 259518_at   | AT1G20510    | 4.19E-03 | 0.90693140  | 0.00000000  | 0.73573780  | -0.04284000 |
| 259564_at   | AT1G20540    | 1.16E-04 | -0.36423160 | -0.00000048 | -0.31727790 | 0.06556892  |
| 259563_s_at | AT1G20590 /  | 1.63E-03 | -0.40645720 | 0.00000024  | -0.25772667 | 0.15821695  |
| 256088_at   | AT1G20810    | 4.05E-03 | -0.68597410 | 0.00000000  | -0.46620512 | 0.18563128  |
| 262796_at   | AT1G20850    | 1.67E-04 | -0.20354939 | 0.00000000  | -0.17501593 | 0.08662367  |
| 261450_s_at | AT1G21110 // | 6.37E-04 | 2.55098900  | -0.00000024 | 2.24990490  | -0.05906189 |
| 261449_at   | AT1G21120    | 1.17E-03 | 2.02425100  | 0.00000000  | 1.27721550  | -0.20603585 |
| 259559_at   | AT1G21240    | 3.70E-03 | 3.37595990  | 0.00000000  | 3.70944880  | 0.50728416  |
| 259561_at   | AT1G21250    | 1.21E-03 | 2.39889000  | -0.00000048 | 2.34940770  | -0.06442022 |
| 259560_at   | AT1G21270    | 2.06E-03 | 1.17938610  | 0.00000000  | 1.20425130  | -0.29712105 |
| 260899_at   | AT1G21370    | 6.63E-04 | 1.15778590  | 0.00000000  | 1.10036330  | -0.10304928 |
| 260902_at   | AT1G21440    | 2.79E-03 | -1.10171990 | 0.00000000  | -0.48805570 | 0.23368597  |
| 260877_at   | AT1G21500    | 6.56E-04 | -0.95225286 | 0.00000000  | -1.38256310 | -0.24998188 |
| 260919_at   | AT1G21520 /  | 1.77E-05 | 2.16096540  | 0.00000000  | 2.53680600  | 0.47472978  |
| 262504_at   | AT1G21750    | 4.18E-03 | 1.50474600  | -0.00000048 | 1.78721810  | 0.30145216  |
| 262499_at   | AT1G21770    | 2.96E-03 | 0.39440490  | 0.00000000  | 0.15906143  | -0.30954456 |
| 260852_at   | AT1G21900    | 2.14E-03 | 1.46460300  | 0.00000000  | 1.65353870  | 0.39236070  |
| 255923_at   | AT1G22180    | 3.48E-04 | 1.75183490  | 0.00000000  | 1.63741210  | 0.12370324  |
| 255966_at   | AT1G22300    | 3.22E-03 | 0.73175430  | 0.00000048  | 0.91677666  | 0.34751750  |
| 261934_at   | AT1G22400    | 1.42E-04 | 1.95384880  | -0.00000024 | 1.91856430  | -0.04775882 |
| 261931_at   | AT1G22430    | 2.62E-03 | -0.83310103 | 0.00000000  | -0.81343246 | 0.11541891  |
| 261938_at   | AT1G22510    | 1.49E-03 | 0.76068780  | 0.00000000  | 0.72851800  | -0.25711513 |
| 264199_at   | AT1G22700    | 2.07E-03 | -0.50491190 | 0.00000048  | -0.18688583 | 0.27525330  |
| 264728_at   | AT1G22850    | 2.73E-03 | -0.55597450 | 0.00000048  | -0.49409485 | 0.03611755  |
| 264901_at   | AT1G23090    | 9.33E-04 | 1.28085570  | 0.00000048  | 0.79467870  | 0.05913019  |
| 265132_at   | AT1G23830    | 1.50E-04 | 1.04070900  | -0.00000024 | 0.69204090  | -0.17925740 |
| 265189_at   | AT1G23840    | 1.20E-05 | 1.07426260  | 0.00000000  | 1.16703180  | -0.35559058 |
| 263032_at   | AT1G23850    | 4.19E-03 | 1.30627080  | 0.00000000  | 0.84078720  | -0.05746579 |
| 264866_at   | AT1G24140    | 6.97E-04 | 2.44004250  | 0.00000024  | 2.40328070  | -0.14439440 |
| 264867_at   | AT1G24150    | 2.43E-03 | 1.83740640  | 0.00000024  | 2.05021070  | 0.05340838  |
| 264862_at   | AT1G24330    | 3.79E-03 | -0.69388247 | 0.00000000  | -0.55579040 | -0.24749279 |
| 265013_at   | AT1G24460    | 1.02E-03 | 0.30230045  | 0.00000000  | 0.15000129  | -0.07071686 |
| 247864_s_at | AT1G24807 /  | 4.20E-04 | 1.94976280  | 0.00000048  | 1.50737620  | 0.07629442  |
| 255732_at   | AT1G25450 /  | 2.63E-03 | -0.47215605 | 0.00000000  | -0.68952847 | -0.15787983 |
| 255735_at   | AT1G25520    | 2.89E-03 | 0.67744875  | 0.00000048  | 0.43799830  | 0.12536097  |
| 255739_at   | AT1G25580    | 1.32E-04 | 0.48584604  | -0.00000024 | 0.51676180  | -0.01423430 |
| 245877_at   | AT1G26220    | 1.95E-03 | -0.59362125 | 0.00000000  | -0.58818555 | 0.01903868  |
| 245873_at   | AT1G26260    | 3.65E-03 | 0.38272333  | 0.00000000  | 0.51321673  | 0.08001638  |
| 261021_at   | AT1G26380    | 4.17E-04 | 2.92352680  | 0.00000024  | 2.80937430  | -0.20534253 |
| 261005_at   | AT1G26420    | 8.94E-05 | 2.69680240  | 0.00000024  | 2.55418660  | -0.16699314 |
| 261012_at   | AT1G26600    | 1.31E-03 | -0.68044780 | -0.00000024 | -0.65617776 | -0.31791234 |
| 261269_at   | AT1G26690    | 3.09E-03 | 1.51039550  | 0.00000000  | 1.65302320  | 0.32648873  |
| 264984_at   | AT1G27000    | 8.81E-04 | 0.55948544  | 0.00000000  | 0.53971530  | -0.04856730 |
| 264989_at   | AT1G27200    | 3.01E-03 | -0.60011150 | 0.00000000  | -0.41409135 | -0.06436920 |
| 264449_at   | AT1G27460    | 8.05E-04 | -0.79283380 | 0.00000000  | -0.84878826 | -0.23909760 |
| 264442_at   | AT1G27480    | 1.55E-03 | -0.88343525 | 0.00000000  | -0.85961150 | -0.01849270 |
| 261648_at   | AT1G27730    | 3.92E-03 | 2.14536100  | 0.00000000  | 1.85764980  | -0.12261558 |
| 261650_at   | AT1G27770    | 1.80E-04 | 1.40568400  | 0.00000048  | 1.49830150  | -0.16002321 |
| 259598_at   | AT1G27980    | 5.31E-04 | 0.99704120  | 0.00000000  | 1.04305600  | -0.16309786 |
| 259586_at   | AT1G28100    | 4.89E-04 | -0.91970587 | -0.00000024 | -0.66532470 | 0.10961866  |
| 261443_at   | AT1G28480    | 2.82E-03 | 2.56757830  | -0.00000024 | 2.10307070  | 0.05356026  |
| 262749_at   | AT1G28580    | 3.15E-03 | 0.43816614  | 0.00000048  | 0.48574877  | 0.04655218  |
| 262748_at   | AT1G28610    | 3.70E-03 | -0.35737896 | 0.00000024  | -0.09425879 | 0.23965430  |
| 262744_at   | AT1G28680    | 7.92E-04 | 0.69915056  | 0.00000000  | 0.73160530  | 0.18185878  |
| 260842_at   | AT1G29150    | 5.62E-05 | 0.63517237  | 0.00000000  | 0.51586866  | 0.12254763  |
| 260897_at   | AT1G29330    | 5.06E-04 | 0.73896930  | 0.00000024  | 0.68958116  | 0.05923867  |
| 259768_at   | AT1G29390    | 1.17E-04 | -0.65433025 | 0.00000000  | -0.72239970 | -0.17895222 |
| 259789_at   | AT1G29395    | 8.78E-04 | -1.40290500 | 0.00000048  | -1.25099130 | -0.02249670 |
| 259773_at   | AT1G29500    | 7.81E-04 | -1.47028400 | 0.00000000  | -1.96513750 | -0.23004580 |
| 259775_at   | AT1G29530    | 4.29E-03 | -0.66968346 | 0.00000000  | -0.72179320 | -0.02353001 |
| 259786_at   | AT1G29660    | 3.38E-04 | -0.89009190 | 0.00000048  | -0.53319120 | 0.19256640  |

|             |           |          |             |             |             |             |
|-------------|-----------|----------|-------------|-------------|-------------|-------------|
| 260029_at   | AT1G30000 | 1.36E-03 | 0.57278490  | 0.00000000  | 0.51655483  | 0.02756596  |
| 245775_at   | AT1G30270 | 2.30E-03 | 1.02429650  | 0.00000000  | 1.19141150  | 0.19282079  |
| 261805_at   | AT1G30540 | 1.10E-03 | 0.34834100  | 0.00000000  | 0.35530043  | 0.02287674  |
| 263222_at   | AT1G30640 | 3.12E-04 | 1.22655100  | 0.00000000  | 0.81835127  | -0.19743657 |
| 265161_at   | AT1G30900 | 6.07E-04 | 2.47333430  | 0.00000000  | 2.46402600  | 0.12165570  |
| 263704_at   | AT1G31130 | 2.39E-03 | 1.19298460  | -0.00000048 | 1.26360320  | 0.29151154  |
| 263705_at   | AT1G31190 | 3.72E-03 | -0.40806484 | -0.00000048 | -0.34173012 | 0.07972240  |
| 256483_at   | AT1G31410 | 7.43E-04 | -0.60165260 | 0.00000000  | -0.65212727 | -0.02298689 |
| 256482_at   | AT1G31420 | 2.05E-03 | -0.81018066 | -0.00000048 | -0.69946957 | -0.30993605 |
| 256489_at   | AT1G31550 | 2.50E-03 | 1.09871010  | 0.00000048  | 0.99555970  | -0.01832581 |
| 246576_at   | AT1G31650 | 1.14E-03 | -0.62299440 | 0.00000000  | -0.49547005 | 0.08706808  |
| 246268_at   | AT1G31800 | 3.06E-03 | -0.88937044 | -0.00000048 | -0.86656570 | -0.07150841 |
| 255719_at   | AT1G32080 | 3.20E-04 | -0.73564960 | 0.00000000  | -0.79251003 | 0.16542244  |
| 245789_at   | AT1G32090 | 7.75E-05 | -1.10709190 | -0.00000048 | -1.08692500 | 0.14580154  |
| 245788_at   | AT1G32120 | 1.54E-03 | 0.54775570  | 0.00000000  | 0.38080597  | -0.13574934 |
| 245790_at   | AT1G32200 | 7.19E-04 | -0.75136614 | 0.00000000  | -0.71537830 | 0.17471313  |
| 245793_at   | AT1G32220 | 6.63E-04 | -0.89269210 | 0.00000000  | -1.02218910 | -0.00182152 |
| 260706_at   | AT1G32350 | 2.25E-03 | 1.19522500  | -0.00000024 | 1.19090100  | -0.45246744 |
| 260704_at   | AT1G32470 | 8.86E-04 | -0.85049390 | 0.00000048  | -0.95661590 | 0.06563473  |
| 256468_at   | AT1G32550 | 7.08E-04 | -0.49940680 | 0.00000000  | -0.63259890 | -0.00420523 |
| 261697_at   | AT1G32610 | 9.22E-04 | -0.24346256 | 0.00000000  | -0.42184973 | -0.24586200 |
| 261242_at   | AT1G32960 | 2.53E-03 | 3.28820850  | 0.00000024  | 2.64470620  | 0.06755424  |
| 261216_at   | AT1G33030 | 3.40E-03 | 1.99412540  | -0.00000024 | 1.41355940  | -0.42831087 |
| 261593_at   | AT1G33170 | 8.61E-04 | -0.65925980 | -0.00000024 | -0.53098010 | 0.19916654  |
| 256534_at   | AT1G33270 | 3.90E-03 | 0.26514673  | 0.00000000  | 0.33545303  | 0.10437822  |
| 256530_at   | AT1G33290 | 2.42E-03 | -0.39462447 | 0.00000000  | -0.50290036 | 0.16025066  |
| 245765_at   | AT1G33600 | 1.29E-04 | 0.49656677  | 0.00000000  | 0.16572046  | 0.13743734  |
| 260119_at   | AT1G33930 | 2.20E-03 | -0.38730693 | 0.00000000  | -0.38743590 | 0.15947318  |
| 260116_at   | AT1G33960 | 1.73E-03 | 3.92656560  | 0.00000000  | 4.24172260  | 0.64904857  |
| 262542_at   | AT1G34180 | 3.57E-04 | 0.63696000  | 0.00000024  | 0.79820490  | -0.43488503 |
| 262514_at   | AT1G34190 | 5.62E-04 | 0.64164686  | 0.00000048  | 0.56707860  | -0.02940464 |
| 262563_at   | AT1G34210 | 3.79E-03 | -0.57079650 | -0.00000024 | -0.69008446 | 0.08173513  |
| 261161_at   | AT1G34420 | 2.55E-05 | 1.28149370  | 0.00000000  | 1.25754400  | -0.10890031 |
| 262408_at   | AT1G34750 | 1.87E-03 | 1.47012470  | 0.00000024  | 1.70152140  | -0.00833178 |
| 255079_s_at | AT1G35160 | 4.00E-05 | 0.31416893  | 0.00000048  | 0.35349370  | -0.06394005 |
| 245755_at   | AT1G35210 | 2.12E-04 | 1.43143370  | 0.00000000  | 0.99692010  | -0.14479947 |
| 262029_at   | AT1G35680 | 2.13E-03 | -0.33449936 | 0.00000000  | -0.25612210 | 0.19744825  |
| 261339_at   | AT1G35710 | 1.42E-03 | 2.85873080  | 0.00000024  | 2.93841930  | 0.24042296  |
| 261286_at   | AT1G35780 | 4.29E-03 | -0.29766417 | 0.00000048  | -0.21270657 | 0.23952007  |
| 256461_s_at | AT1G36280 | 3.29E-03 | -0.29722548 | 0.00000000  | 0.01897001  | 0.72219515  |
| 262721_at   | AT1G43560 | 4.15E-03 | -0.70857096 | 0.00000000  | -0.76346684 | -0.09721136 |
| 259507_at   | AT1G43910 | 1.05E-03 | 3.09469220  | -0.00000024 | 3.22566750  | -0.04941416 |
| 245738_at   | AT1G44130 | 2.89E-03 | 1.35745550  | 0.00000000  | 1.44274140  | -0.11916900 |
| 261338_at   | AT1G44920 | 1.94E-03 | -0.59172297 | 0.00000000  | -0.52010010 | 0.17137480  |
| 260943_at   | AT1G45145 | 1.30E-03 | 2.36096620  | 0.00000048  | 2.17819070  | 0.17256021  |
| 245806_at   | AT1G45474 | 1.31E-04 | -0.81408930 | 0.00000000  | -0.99632500 | -0.06901217 |
| 260503_at   | AT1G47250 | 3.88E-03 | 0.95907927  | 0.00000000  | 1.04833320  | 0.40050507  |
| 262434_at   | AT1G47670 | 2.16E-03 | -0.67075634 | 0.00000000  | -0.52885675 | -0.01277065 |
| 260730_at   | AT1G48030 | 2.47E-03 | -0.56376220 | -0.00000048 | -0.32073545 | 0.27311277  |
| 260728_at   | AT1G48210 | 4.23E-03 | 1.47393850  | 0.00000000  | 1.53799100  | 0.23299990  |
| 262245_at   | AT1G48240 | 5.36E-04 | -0.79487850 | 0.00000024  | -0.76201034 | 0.01610375  |
| 262237_at   | AT1G48320 | 8.18E-05 | 1.54918100  | 0.00000048  | 1.56217000  | -0.16844294 |
| 261309_at   | AT1G48598 | 2.23E-04 | -0.93002367 | 0.00000000  | -0.82595350 | 0.22468328  |
| 256145_at   | AT1G48750 | 4.36E-04 | -0.64675546 | 0.00000000  | -0.51101875 | -0.07791138 |
| 256165_at   | AT1G48780 | 4.17E-03 | -0.66864610 | 0.00000000  | -0.54925513 | -0.33399320 |
| 260754_at   | AT1G49000 | 1.08E-03 | 1.46638750  | 0.00000000  | 1.16459180  | 0.09082770  |
| 260772_at   | AT1G49050 | 5.31E-04 | 1.39660550  | 0.00000048  | 1.49473670  | -0.28905392 |
| 262397_at   | AT1G49380 | 1.83E-03 | -0.67176200 | 0.00000000  | -0.70698640 | 0.16200876  |
| 262393_at   | AT1G49490 | 4.32E-04 | -0.60058856 | 0.00000000  | -0.53345656 | -0.14821911 |
| 261607_at   | AT1G49660 | 7.35E-04 | -0.38685298 | 0.00000048  | -0.26902390 | 0.27271270  |
| 261638_at   | AT1G49975 | 2.93E-03 | -1.01912950 | 0.00000000  | -1.20223740 | 0.11227274  |
| 261866_at   | AT1G50420 | 1.46E-03 | 0.79882310  | 0.00000024  | 0.60997580  | 0.02392769  |
| 246630_at   | AT1G50730 | 4.24E-03 | -1.14285800 | 0.00000000  | -0.98125460 | -0.23792171 |
| 246631_at   | AT1G50740 | 4.80E-04 | 1.32536510  | 0.00000000  | 1.21347710  | -0.15276718 |
| 245749_at   | AT1G51090 | 3.33E-03 | -1.77287270 | 0.00000048  | -1.52333380 | -0.10576725 |
| 245745_at   | AT1G51110 | 1.33E-03 | -0.93052100 | 0.00000000  | -1.07699680 | -0.07347632 |
| 260511_at   | AT1G51570 | 5.78E-04 | -0.62065220 | 0.00000048  | -0.66320515 | -0.06734228 |
| 256177_at   | AT1G51620 | 6.50E-04 | 1.03277870  | 0.00000000  | 0.84470130  | 0.15076923  |
| 256183_at   | AT1G51660 | 2.56E-03 | 1.72209400  | -0.00000024 | 1.70665550  | 0.13652754  |
| 256179_at   | AT1G51710 | 1.19E-03 | 0.59298944  | 0.00000000  | 0.83297350  | 0.21291828  |
| 256178_s_at | AT1G51760 | 8.42E-04 | 2.33982000  | 0.00000000  | 1.83271700  | 0.01950693  |
| 256170_at   | AT1G51790 | 2.38E-03 | 1.27967830  | 0.00000024  | 0.99908304  | -0.21743608 |
| 256169_at   | AT1G51800 | 3.67E-04 | 1.81362630  | 0.00000000  | 1.64083770  | -0.09047985 |
| 246366_at   | AT1G51850 | 6.40E-04 | 1.47358630  | -0.00000024 | 0.99245240  | 0.02201629  |
| 246373_at   | AT1G51860 | 1.99E-03 | 0.78920960  | 0.00000000  | 0.94295120  | -0.00957370 |
| 246368_at   | AT1G51890 | 2.23E-03 | 2.80433030  | 0.00000000  | 2.50484320  | -0.08948827 |
| 246370_at   | AT1G51920 | 1.90E-03 | 1.35976170  | 0.00000000  | 1.19710060  | -0.44890690 |
| 259841_at   | AT1G52200 | 4.10E-03 | 1.96426530  | 0.00000000  | 1.39427660  | -0.00843287 |
| 262155_at   | AT1G52420 | 5.93E-05 | 0.67621470  | 0.00000048  | 0.76690817  | 0.08870840  |
| 262161_at   | AT1G52600 | 6.31E-04 | 0.97546720  | 0.00000048  | 1.03853700  | 0.14683533  |
| 261317_at   | AT1G53030 | 6.20E-04 | 1.20619230  | 0.00000000  | 0.83107040  | -0.09405541 |
| 260644_at   | AT1G53290 | 1.93E-03 | -0.28653050 | 0.00000048  | -0.52071047 | -0.18053246 |
| 260989_at   | AT1G53450 | 4.13E-03 | -0.86172867 | -0.00000048 | -0.59471416 | -0.15913868 |
| 260982_at   | AT1G53520 | 4.18E-04 | -0.82540080 | 0.00000048  | -1.06626610 | -0.03249836 |
| 263156_at   | AT1G54030 | 7.51E-05 | 0.73811910  | 0.00000000  | 0.71615744  | 0.17582178  |
| 263174_at   | AT1G54040 | 3.49E-03 | -0.73627660 | 0.00000000  | -0.66492414 | 0.15176582  |
| 263162_at   | AT1G54150 | 4.23E-03 | 0.70514345  | 0.00000048  | 0.37690640  | -0.00299692 |
| 262963_at   | AT1G54220 | 2.74E-03 | -0.39883566 | 0.00000024  | -0.19735622 | 0.09157562  |
| 262960_at   | AT1G54320 | 1.14E-03 | 1.09233950  | -0.00000048 | 0.92988350  | 0.04360771  |

|             |           |          |             |             |             |             |
|-------------|-----------|----------|-------------|-------------|-------------|-------------|
| 262954_at   | AT1G54500 | 2.26E-03 | -0.77517460 | -0.00000048 | -0.81995250 | -0.05232716 |
| 264186_at   | AT1G54570 | 2.52E-03 | -0.47063303 | 0.00000024  | -0.57498455 | 0.10883904  |
| 259658_at   | AT1G55370 | 1.36E-04 | -1.31744530 | -0.00000048 | -1.56734160 | -0.06578922 |
| 260601_at   | AT1G55910 | 7.44E-04 | 1.34291550  | -0.00000048 | 1.37172370  | -0.14393711 |
| 259604_at   | AT1G56450 | 9.26E-04 | 0.84706210  | 0.00000000  | 0.86990070  | 0.26299047  |
| 259603_at   | AT1G56500 | 6.01E-05 | -0.77570630 | 0.00000048  | -0.91940403 | -0.14044619 |
| 246401_at   | AT1G57560 | 5.07E-04 | 2.28806780  | 0.00000024  | 1.81969070  | -0.19653988 |
| 246405_at   | AT1G57630 | 2.67E-04 | 3.72304200  | 0.00000024  | 3.58600190  | 0.15952086  |
| 246406_at   | AT1G57650 | 1.22E-03 | 1.06230620  | 0.00000024  | 0.93350863  | -0.11985493 |
| 256018_at   | AT1G58300 | 3.22E-03 | 1.01745630  | 0.00000000  | 1.02940750  | 0.12602878  |
| 262910_at   | AT1G59710 | 3.36E-03 | 1.00033810  | -0.00000024 | 1.17633680  | -0.10792828 |
| 262907_at   | AT1G59720 | 2.96E-04 | -0.87938550 | 0.00000000  | -0.79344010 | -0.11438966 |
| 262897_at   | AT1G59840 | 1.05E-03 | -0.91628313 | -0.00000024 | -0.90918064 | 0.21367216  |
| 262899_at   | AT1G59870 | 4.24E-03 | 0.68768406  | 0.00000048  | 0.56237745  | -0.07300949 |
| 264219_at   | AT1G60420 | 1.74E-03 | 1.36233570  | 0.00000024  | 1.21456380  | 0.31816435  |
| 264244_at   | AT1G60440 | 3.47E-03 | 0.46741915  | -0.00000048 | 0.18211603  | -0.14741135 |
| 264920_at   | AT1G60550 | 9.90E-04 | -0.55497410 | 0.00000000  | -0.85124160 | 0.12092686  |
| 264963_at   | AT1G60600 | 1.57E-03 | -0.77423190 | 0.00000048  | -0.62161300 | 0.03673267  |
| 264911_at   | AT1G60690 | 6.88E-04 | -0.80781436 | 0.00000000  | -0.66712500 | 0.11108422  |
| 264929_at   | AT1G60730 | 1.24E-03 | 1.04340700  | 0.00000000  | 1.30985620  | 0.20668983  |
| 264923_s_at | AT1G60740 | 3.22E-03 | 1.50947950  | -0.00000024 | 1.19964340  | 0.08361149  |
| 264932_at   | AT1G61240 | 1.41E-03 | -0.42515993 | 0.00000024  | -0.44862770 | -0.03677392 |
| 264879_at   | AT1G61260 | 3.11E-03 | 0.30923963  | 0.00000000  | 0.60226630  | -0.25696683 |
| 264757_at   | AT1G61360 | 8.45E-05 | 1.78759860  | 0.00000000  | 1.41456750  | -0.03998590 |
| 264756_at   | AT1G61370 | 1.76E-03 | 1.27254840  | 0.00000000  | 0.85578084  | -0.15835500 |
| 264766_at   | AT1G61420 | 7.69E-05 | 1.19053790  | -0.00000024 | 1.16523200  | -0.11879301 |
| 265008_at   | AT1G61560 | 3.02E-04 | 1.57004190  | 0.00000000  | 1.15250280  | -0.13106155 |
| 264428_at   | AT1G61790 | 2.41E-04 | 0.57428600  | 0.00000048  | 0.58984330  | 0.03677034  |
| 264400_at   | AT1G61800 | 3.66E-03 | 2.95156240  | 0.00000000  | 3.19314200  | 0.23065805  |
| 264307_at   | AT1G61900 | 1.38E-03 | -0.73464870 | 0.00000048  | -0.89186860 | -0.19120121 |
| 264744_at   | AT1G62050 | 3.80E-03 | -0.48229670 | 0.00000000  | -0.41835856 | -0.04959631 |
| 264737_at   | AT1G62210 | 2.86E-03 | -0.38981628 | 0.00000000  | -0.14718151 | -0.18146992 |
| 264746_at   | AT1G62300 | 1.82E-04 | 1.47227810  | -0.00000024 | 1.39421610  | 0.08762407  |
| 260109_at   | AT1G63260 | 1.23E-03 | -0.74206970 | 0.00000048  | -1.00990180 | -0.28373766 |
| 261545_at   | AT1G63530 | 2.36E-04 | 0.15662408  | 0.00000024  | 0.16509962  | -0.20457196 |
| 260243_at   | AT1G63720 | 3.87E-03 | 1.27470870  | 0.00000000  | 1.29778670  | 0.02034760  |
| 260314_at   | AT1G63830 | 8.14E-04 | 0.24340630  | 0.00000000  | 0.28262330  | -0.06837893 |
| 260327_at   | AT1G63840 | 1.73E-04 | 2.23022560  | -0.00000048 | 1.78256510  | -0.15232325 |
| 262344_at   | AT1G64060 | 8.69E-04 | 0.36155438  | 0.00000000  | 0.59410360  | 0.20766354  |
| 259764_at   | AT1G64280 | 1.12E-03 | 0.82640123  | 0.00000000  | 0.68731120  | -0.10218239 |
| 259738_at   | AT1G64355 | 7.88E-04 | -1.33098220 | 0.00000048  | -1.23469540 | -0.04231501 |
| 261952_at   | AT1G64430 | 3.34E-03 | -0.48066378 | 0.00000048  | -0.56314680 | -0.13966560 |
| 262003_at   | AT1G64460 | 2.82E-03 | 0.53197980  | 0.00000000  | 0.35805345  | 0.05156779  |
| 261973_at   | AT1G64610 | 4.25E-03 | 1.57871440  | 0.00000000  | 1.44885350  | 0.22607899  |
| 262878_at   | AT1G64770 | 9.26E-04 | -1.30558970 | 0.00000000  | -1.33009200 | -0.17925310 |
| 264161_at   | AT1G65420 | 2.59E-03 | -0.49148655 | 0.00000000  | -0.52301025 | -0.09779501 |
| 262932_at   | AT1G65820 | 2.86E-05 | 1.14283510  | 0.00000000  | 1.05207540  | 0.05227470  |
| 261917_at   | AT1G65920 | 4.83E-04 | -0.67630460 | -0.00000024 | -0.56294820 | -0.18248415 |
| 256526_at   | AT1G66090 | 9.58E-04 | 1.63388200  | 0.00000000  | 1.62078240  | -0.34875345 |
| 256522_at   | AT1G66160 | 2.56E-04 | 1.97713730  | 0.00000000  | 1.53918600  | 0.05765128  |
| 256376_s_at | AT1G66690 | 2.91E-03 | 1.96472260  | 0.00000000  | 1.50029800  | -0.19895756 |
| 256366_at   | AT1G66880 | 6.20E-04 | 2.97934060  | 0.00000000  | 3.10261200  | 0.67021490  |
| 245760_s_at | AT1G66910 | 2.45E-03 | 0.91048527  | -0.00000024 | 0.97288750  | 0.22507739  |
| 255912_at   | AT1G66960 | 2.54E-03 | 0.64823700  | -0.00000024 | 0.85921670  | -0.10190725 |
| 255851_at   | AT1G67040 | 2.53E-03 | -0.67328095 | -0.00000024 | -0.60131025 | 0.19471312  |
| 264998_at   | AT1G67330 | 3.80E-04 | 0.92804720  | 0.00000000  | 0.67626380  | -0.00524020 |
| 264224_at   | AT1G67440 | 3.84E-03 | -0.36643076 | 0.00000000  | -0.36375737 | 0.21171618  |
| 264232_at   | AT1G67470 | 3.51E-03 | 0.46791792  | 0.00000000  | 0.56557417  | -0.05610132 |
| 264223_s_at | AT1G67520 | 4.11E-04 | 2.02816410  | 0.00000000  | 1.74394060  | -0.00852966 |
| 245190_at   | AT1G67690 | 4.22E-03 | -0.87230350 | 0.00000000  | -0.79155517 | -0.40806710 |
| 245198_at   | AT1G67700 | 3.48E-05 | -0.79184770 | 0.00000000  | -0.78212786 | 0.07138968  |
| 245195_at   | AT1G67740 | 2.65E-03 | -0.35300112 | 0.00000000  | -0.40545988 | 0.10726929  |
| 245197_at   | AT1G67800 | 6.85E-06 | 1.36755080  | 0.00000000  | 1.61282830  | -0.06419778 |
| 245193_at   | AT1G67810 | 2.17E-04 | 2.10628560  | 0.00000024  | 1.90996310  | -0.12061501 |
| 245200_at   | AT1G67850 | 1.40E-03 | 1.39787630  | 0.00000000  | 1.47631450  | 0.36724472  |
| 259992_at   | AT1G67970 | 1.82E-03 | 0.83448650  | 0.00000000  | 0.86479710  | -0.19221592 |
| 259999_at   | AT1G68080 | 3.28E-04 | -0.51029444 | 0.00000000  | -0.35448456 | 0.16419220  |
| 260442_at   | AT1G68220 | 2.67E-03 | -0.57357025 | -0.00000048 | -0.39148092 | 0.18776321  |
| 260444_at   | AT1G68300 | 1.01E-03 | 1.31816480  | 0.00000000  | 1.20743750  | 0.12798548  |
| 260260_at   | AT1G68540 | 6.36E-04 | -0.80994510 | 0.00000024  | -0.78126050 | 0.23601079  |
| 262275_at   | AT1G68710 | 1.79E-03 | 1.06807780  | 0.00000000  | 1.28894520  | 0.26386046  |
| 257516_at   | AT1G69040 | 1.57E-03 | -0.64146520 | 0.00000000  | -0.24522400 | 0.56729270  |
| 260345_at   | AT1G69270 | 1.33E-03 | 1.32703450  | 0.00000024  | 1.29048160  | 0.01872158  |
| 256300_at   | AT1G69490 | 4.03E-04 | 2.96433260  | 0.00000000  | 1.98309420  | -0.40563320 |
| 256304_at   | AT1G69523 | 3.67E-04 | -1.00637700 | 0.00000024  | -1.37189580 | 0.06616783  |
| 260371_at   | AT1G69690 | 2.92E-03 | -0.70556164 | 0.00000048  | -0.45041418 | 0.06341791  |
| 260368_at   | AT1G69700 | 4.03E-03 | -0.97639180 | -0.00000048 | -0.96294045 | 0.01423502  |
| 264703_at   | AT1G69960 | 9.99E-04 | 0.63795185  | 0.00000000  | 0.42534304  | -0.00811863 |
| 264717_at   | AT1G70140 | 2.15E-04 | 0.71430945  | 0.00000024  | 0.64157796  | -0.30225540 |
| 264716_at   | AT1G70170 | 3.63E-03 | 0.38195038  | 0.00000024  | 0.49754667  | -0.13745880 |
| 264313_at   | AT1G70410 | 3.35E-03 | -0.53493834 | 0.00000000  | -0.62355950 | -0.13430500 |
| 260305_at   | AT1G70490 | 2.51E-03 | 0.48636818  | 0.00000000  | 0.53255844  | 0.18400002  |
| 260363_at   | AT1G70550 | 2.11E-03 | -0.46690083 | 0.00000000  | -0.53308250 | 0.17876077  |
| 260179_at   | AT1G70690 | 7.83E-04 | 1.84368130  | 0.00000024  | 1.95874190  | 0.08192015  |
| 259749_at   | AT1G71100 | 1.56E-03 | 1.54181220  | 0.00000024  | 1.44596240  | 0.48512530  |
| 259952_at   | AT1G71400 | 1.11E-03 | 0.48758388  | 0.00000024  | 0.34791207  | -0.26654744 |
| 261518_at   | AT1G71695 | 1.64E-03 | -0.68632700 | -0.00000048 | -0.64659166 | -0.04463291 |
| 261520_at   | AT1G71820 | 1.05E-03 | 0.24695969  | 0.00000000  | 0.27097130  | -0.06222773 |
| 260171_at   | AT1G71910 | 6.88E-04 | 0.32910180  | 0.00000000  | 0.23578000  | -0.14247632 |

|             |             |          |             |             |              |             |
|-------------|-------------|----------|-------------|-------------|--------------|-------------|
| 260174_at   | AT1G71940   | 2.36E-03 | 0.44978880  | 0.00000000  | 0.42080380   | -0.00944138 |
| 259801_at   | AT1G72230   | 4.57E-04 | -0.50323940 | 0.00000000  | -0.34844208  | 0.04853225  |
| 259850_at   | AT1G72240   | 1.60E-03 | 0.99848200  | 0.00000000  | 0.92181040   | -0.12825203 |
| 259852_at   | AT1G72280   | 4.22E-04 | 2.51826480  | 0.00000000  | 2.20802300   | 0.08392334  |
| 260454_at   | AT1G72310   | 2.25E-03 | -0.54650450 | 0.00000000  | -0.37528872  | 0.05147314  |
| 260399_at   | AT1G72520   | 8.46E-04 | 2.68947740  | 0.00000024  | 2.11613270   | -0.19066286 |
| 259921_at   | AT1G72540   | 1.09E-03 | 1.06962440  | 0.00000000  | 1.28283670   | -0.18649721 |
| 259912_at   | AT1G72670   | 1.49E-03 | -0.45210670 | 0.00000000  | -0.11045885  | 0.02471542  |
| 259910_at   | AT1G72700   | 8.60E-04 | 0.76042270  | 0.00000000  | 1.06934500   | 0.15908432  |
| 262381_at   | AT1G72900   | 2.86E-03 | 2.57534600  | 0.00000000  | 2.16924330   | 0.02141857  |
| 262382_at   | AT1G72920   | 9.94E-05 | 1.92275710  | 0.00000024  | 1.43702770   | -0.11766148 |
| 262383_at   | AT1G72940   | 3.64E-03 | 1.27255580  | 0.00000000  | 1.21585700   | 0.02856994  |
| 262377_at   | AT1G73110   | 1.14E-03 | -0.72030690 | 0.00000000  | -0.71688750  | 0.13675451  |
| 260046_at   | AT1G73805   | 7.42E-04 | 2.14162540  | 0.00000000  | 2.23539780   | -0.22799087 |
| 260388_at   | AT1G74070   | 1.33E-03 | -1.02870420 | 0.00000000  | -0.91448020  | 0.21095371  |
| 260394_at   | AT1G74080   | 3.50E-03 | 0.55817030  | 0.00000024  | 0.64622283   | -0.00954485 |
| 260387_at   | AT1G74100   | 3.39E-03 | 1.45833020  | 0.00000000  | 1.31511020   | 0.29172993  |
| 260249_s_at | AT1G74280 / | 1.18E-03 | 0.90910720  | -0.00000024 | 0.68143535   | -0.00880075 |
| 260248_at   | AT1G74310   | 2.62E-03 | 0.50405170  | 0.00000024  | 0.56727030   | 0.08191133  |
| 260239_at   | AT1G74360   | 5.10E-04 | 2.13909820  | 0.00000000  | 2.12361720   | -0.05412984 |
| 260211_at   | AT1G74440   | 2.31E-03 | 0.91456030  | 0.00000000  | 0.78639317   | -0.49239420 |
| 260225_at   | AT1G74590   | 3.60E-03 | 2.55197760  | 0.00000000  | 2.70040560   | 0.27036572  |
| 262177_at   | AT1G74710   | 2.50E-04 | 2.83771420  | 0.00000000  | 3.00807100   | 0.48639630  |
| 262175_at   | AT1G74880   | 3.53E-03 | -0.97000310 | -0.00000048 | -1.24330850  | 0.17401266  |
| 259925_at   | AT1G75040   | 1.91E-03 | 3.09392070  | 0.00000000  | 3.39781480   | 0.29143190  |
| 256451_s_at | AT1G75170 / | 3.70E-04 | 1.56737950  | -0.00000024 | 1.56409220   | -0.01867962 |
| 262980_at   | AT1G75680   | 8.44E-04 | -0.60664750 | 0.00000048  | -0.63134670  | -0.12658548 |
| 262970_at   | AT1G75690   | 2.47E-04 | -0.85268500 | 0.00000048  | -1.06807570  | 0.01527309  |
| 262728_at   | AT1G75820   | 1.96E-03 | -0.82946205 | 0.00000048  | -0.91203547  | -0.34371138 |
| 262682_at   | AT1G75900   | 1.92E-03 | -1.05277060 | 0.00000000  | -0.70768640  | 0.17688799  |
| 262698_at   | AT1G75960   | 2.24E-05 | -1.46682330 | -0.00000024 | -1.72141620  | -0.43515730 |
| 262671_at   | AT1G76040   | 9.95E-05 | 2.19973200  | 0.00000000  | 2.25931260   | 0.04736352  |
| 261754_at   | AT1G76130   | 3.34E-04 | 0.59775780  | 0.00000000  | 0.43762040   | 0.17893219  |
| 259884_at   | AT1G76390   | 2.79E-03 | 0.40342950  | 0.00000000  | 0.43551922   | -0.17613220 |
| 264951_at   | AT1G76970   | 8.94E-04 | 1.32475230  | 0.00000024  | 1.34652570   | -0.09886551 |
| 264954_at   | AT1G77060   | 1.12E-03 | -1.05426410 | 0.00000000  | -1.27142600  | -0.14069033 |
| 264959_at   | AT1G77090   | 2.18E-04 | -0.55028486 | 0.00000000  | -0.57625914  | 0.27937222  |
| 264485_at   | AT1G77220   | 3.07E-04 | 0.03869033  | 0.00000000  | 0.11717057   | -0.07665086 |
| 246413_at   | AT1G77310   | 4.10E-03 | -0.37783290 | -0.00000024 | -0.39315748  | -0.14205956 |
| 246384_at   | AT1G77370   | 3.21E-03 | 0.83160450  | 0.00000048  | 0.74117374   | -0.16454506 |
| 259708_at   | AT1G77420   | 1.25E-03 | 0.57362270  | 0.00000048  | 0.40659142   | -0.16520715 |
| 259707_at   | AT1G77490   | 2.21E-03 | -0.79000616 | 0.00000000  | -1.00410510  | -0.12753487 |
| 259734_at   | AT1G77500   | 2.19E-03 | 0.69317530  | -0.00000024 | 0.78780770   | 0.05613446  |
| 262137_at   | AT1G77920   | 2.41E-03 | 0.52878857  | -0.00000048 | 0.62753680   | 0.18967438  |
| 260081_at   | AT1G78170   | 1.25E-03 | -1.15240430 | 0.00000000  | -0.102883340 | 0.07789135  |
| 260082_at   | AT1G78180   | 9.02E-04 | -0.97476390 | 0.00000000  | -0.93447113  | -0.09442997 |
| 260746_at   | AT1G78380   | 1.87E-03 | 0.57693150  | 0.00000000  | 0.77066610   | 0.36776210  |
| 260804_at   | AT1G78410   | 2.76E-03 | 3.75307420  | 0.00000000  | 3.49554970   | 0.21728158  |
| 263133_at   | AT1G78450   | 2.32E-03 | -0.65394950 | 0.00000000  | -0.86899710  | 0.10668421  |
| 263134_at   | AT1G78570   | 2.00E-03 | 1.30152650  | 0.00000000  | 1.36807160   | 0.35949400  |
| 264250_at   | AT1G78680   | 3.08E-03 | -0.70068360 | 0.00000048  | -0.37610197  | 0.00330591  |
| 264291_at   | AT1G78800   | 3.58E-03 | 0.23292279  | 0.00000000  | 0.24320960   | -0.26585388 |
| 264279_s_at | AT1G78820 / | 3.10E-03 | 0.75984480  | 0.00000048  | 0.29373120   | -0.32515526 |
| 264096_at   | AT1G78995   | 7.54E-04 | -1.12295960 | -0.00000048 | -0.91722630  | 0.09558821  |
| 264120_at   | AT1G79340   | 1.67E-03 | 0.54304314  | 0.00000000  | 0.56453943   | 0.04860973  |
| 262942_at   | AT1G79450   | 9.78E-05 | 1.54991840  | 0.00000000  | 1.68962550   | 0.15393877  |
| 262945_at   | AT1G79510   | 3.32E-03 | -0.79286290 | 0.00000000  | -0.68454840  | 0.06518364  |
| 261394_at   | AT1G79680   | 2.95E-03 | 1.65140630  | 0.00000024  | 1.33277940   | -0.23239875 |
| 261346_at   | AT1G79720   | 1.90E-03 | -0.87547064 | 0.00000048  | -0.83858250  | -0.30050707 |
| 261351_at   | AT1G79790   | 3.49E-03 | -0.47985554 | 0.00000000  | -0.74422790  | -0.18524313 |
| 262059_at   | AT1G80030   | 1.97E-03 | -0.56521080 | 0.00000048  | -0.55140830  | 0.25734997  |
| 262050_at   | AT1G80130   | 3.85E-03 | 1.51773120  | 0.00000000  | 1.58313540   | 0.16793180  |
| 261892_at   | AT1G80840   | 1.11E-03 | 2.76900100  | 0.00000000  | 2.44118600   | -0.11929774 |
| 265737_at   | AT2G01180   | 1.95E-03 | 0.35514832  | 0.00000048  | 0.18954706   | -0.50607440 |
| 266342_at   | AT2G01540   | 2.75E-04 | 1.21303370  | 0.00000000  | 1.10177560   | -0.08065867 |
| 266329_at   | AT2G01590   | 3.75E-03 | -1.01878400 | 0.00000048  | -1.13128570  | -0.05645800 |
| 265868_at   | AT2G01650   | 1.07E-04 | 1.29983380  | -0.00000048 | 1.24098630   | 0.13452768  |
| 265871_at   | AT2G01680   | 2.33E-04 | 0.62321710  | 0.00000024  | 0.56160640   | 0.05643129  |
| 265869_at   | AT2G01760   | 1.10E-03 | -1.02056410 | 0.00000000  | -0.84482620  | -0.45520140 |
| 263597_at   | AT2G01870   | 1.40E-03 | -1.36503600 | 0.00000000  | -1.56725500  | -0.28603410 |
| 266120_at   | AT2G02070   | 3.01E-04 | -0.68216990 | 0.00000000  | -0.62292480  | 0.07126236  |
| 266181_at   | AT2G02390   | 9.82E-05 | 1.41550020  | 0.00000048  | 1.22162870   | 0.05192757  |
| 267481_at   | AT2G02780   | 2.67E-06 | -0.85758376 | 0.00000000  | -1.01413150  | -0.11254668 |
| 266746_s_at | AT2G02930 / | 4.14E-03 | 2.50702860  | 0.00000000  | 2.52219580   | 0.33208704  |
| 266709_at   | AT2G03120   | 3.06E-04 | 1.28583430  | 0.00000000  | 1.32716560   | 0.42057276  |
| 265719_at   | AT2G03500   | 1.45E-03 | -0.24334383 | 0.00000000  | -0.32437992  | -0.15962076 |
| 265717_at   | AT2G03510   | 3.26E-03 | 1.02939800  | -0.00000048 | 1.29807000   | 0.20071602  |
| 264041_at   | AT2G03710   | 2.43E-03 | -0.74611760 | 0.00000000  | -0.71657515  | 0.01884770  |
| 264037_at   | AT2G03750   | 1.74E-03 | -0.74660444 | 0.00000048  | -0.62719440  | 0.43664837  |
| 263322_at   | AT2G04270   | 4.12E-03 | -0.63623047 | 0.00000000  | -0.38081170  | 0.49887180  |
| 263807_at   | AT2G04400   | 1.12E-03 | 2.21139530  | 0.00000000  | 1.98761990   | 0.00871325  |
| 263854_at   | AT2G04430   | 3.27E-04 | 2.16769270  | 0.00000000  | 2.44339560   | -0.08274341 |
| 263852_at   | AT2G04450   | 2.41E-03 | 2.84825700  | -0.00000024 | 3.20522550   | 0.23471928  |
| 263054_at   | AT2G04620   | 1.23E-03 | 0.54284050  | 0.00000024  | 0.46887255   | -0.12421846 |
| 263631_at   | AT2G04900   | 2.17E-03 | 0.70424510  | 0.00000048  | 0.39650726   | -0.30271340 |
| 263048_s_at | AT2G05310 / | 9.69E-04 | -0.88003683 | 0.00000000  | -1.00273180  | -0.23616982 |
| 263105_at   | AT2G05320   | 8.19E-04 | 1.07952670  | 0.00000000  | 0.92462610   | 0.20791411  |
| 266037_at   | AT2G05940   | 1.26E-03 | 1.75553800  | -0.00000048 | 1.83786770   | 0.26719760  |
| 265373_at   | AT2G06510   | 4.28E-03 | 0.36290264  | 0.00000000  | 0.11840677   | -0.21533728 |

|             |             |          |             |             |             |             |
|-------------|-------------|----------|-------------|-------------|-------------|-------------|
| 265375_at   | AT2G06530   | 7.17E-04 | 0.64227150  | 0.00000000  | 0.68885565  | 0.03365278  |
| 263053_at   | AT2G13440   | 1.94E-03 | -0.60784390 | -0.00000024 | -0.62863540 | -0.06037903 |
| 263726_at   | AT2G13610   | 3.47E-03 | -0.91592026 | -0.00000048 | -1.13632060 | -0.38624907 |
| 263722_at   | AT2G13650   | 2.34E-03 | 0.68482830  | 0.00000048  | 0.40744400  | 0.04041910  |
| 264107_s_at | AT2G13790 / | 4.31E-04 | 2.22058200  | 0.00000000  | 2.38446040  | 0.36447716  |
| 265658_at   | AT2G13810   | 4.77E-04 | 2.39028120  | -0.00000024 | 2.39300970  | -0.07655168 |
| 267106_s_at | AT2G14720 / | 1.94E-03 | 0.52101610  | 0.00000048  | 0.68979070  | 0.01229334  |
| 265894_at   | AT2G15050   | 1.87E-03 | -0.52368260 | -0.00000048 | -0.56484413 | 0.07293892  |
| 263297_at   | AT2G15310   | 3.84E-03 | 0.65062260  | 0.00000000  | 0.62882495  | 0.18666506  |
| 263565_at   | AT2G15390   | 1.14E-04 | 1.80244540  | 0.00000000  | 1.54717640  | -0.22025204 |
| 265494_at   | AT2G15680   | 7.07E-04 | -0.54489850 | 0.00000024  | -0.44423700 | -0.15987635 |
| 265480_at   | AT2G15970   | 2.71E-04 | -0.65441180 | 0.00000000  | -0.53538230 | 0.02488422  |
| 263606_at   | AT2G16280   | 1.29E-03 | -0.97702410 | 0.00000000  | -1.03869010 | -0.21478844 |
| 263241_at   | AT2G16500   | 3.73E-03 | 1.04249000  | 0.00000000  | 0.56491137  | 0.07700348  |
| 265356_at   | AT2G16595   | 3.57E-03 | 0.70807720  | 0.00000000  | 0.69365050  | -0.04974723 |
| 266536_at   | AT2G16900   | 3.19E-03 | 1.56817960  | 0.00000024  | 1.59495780  | 0.37087130  |
| 263574_at   | AT2G16990   | 3.13E-03 | -1.28088690 | 0.00000000  | -1.16355990 | 0.03945541  |
| 263550_at   | AT2G17033   | 1.91E-03 | -0.55996180 | 0.00000000  | -0.45194864 | -0.11328650 |
| 263584_at   | AT2G17040   | 2.05E-03 | 1.98429300  | 0.00000000  | 2.15926030  | -0.12737179 |
| 263419_at   | AT2G17220   | 4.10E-06 | 0.92980003  | 0.00000048  | 1.07041500  | -0.11991453 |
| 264909_at   | AT2G17300   | 2.49E-03 | -0.78751490 | -0.00000024 | -0.80808780 | 0.27059865  |
| 264904_s_at | AT2G17420 / | 1.90E-03 | 0.83341646  | 0.00000000  | 0.76483200  | 0.20510006  |
| 264589_at   | AT2G17650   | 3.82E-03 | -0.75858974 | 0.00000024  | -0.78292800 | 0.04679346  |
| 264592_at   | AT2G17720   | 1.22E-03 | 1.62509160  | -0.00000048 | 1.48846820  | 0.08923245  |
| 264619_at   | AT2G17760   | 3.78E-03 | 0.99768543  | 0.00000000  | 0.90596580  | 0.01714039  |
| 264622_at   | AT2G17790   | 3.25E-04 | 1.17355870  | -0.00000024 | 1.16954900  | 0.41554832  |
| 266070_at   | AT2G18660   | 1.87E-03 | 3.66701560  | 0.00000000  | 3.87967250  | 0.31455708  |
| 266071_at   | AT2G18670 / | 9.59E-06 | 1.40675400  | 0.00000000  | 1.25397900  | -0.35727692 |
| 266017_at   | AT2G18690   | 1.79E-03 | 2.38329600  | 0.00000000  | 2.35693600  | 0.01873732  |
| 266018_at   | AT2G18710   | 2.61E-03 | -0.71208000 | 0.00000048  | -0.78129100 | 0.02352905  |
| 267490_at   | AT2G19130   | 6.93E-05 | 0.75045300  | 0.00000000  | 0.66509485  | -0.33270310 |
| 267436_at   | AT2G19190   | 3.10E-03 | 2.56040380  | 0.00000000  | 2.43253000  | 0.44759417  |
| 266685_at   | AT2G19710   | 1.60E-03 | 0.75683640  | 0.00000000  | 0.55880547  | -0.38346362 |
| 266682_at   | AT2G19780   | 7.09E-04 | -0.46185230 | 0.00000000  | -0.40514588 | 0.15416980  |
| 265597_at   | AT2G20142   | 4.08E-04 | 2.10571380  | 0.00000000  | 2.17637090  | 0.38654995  |
| 265283_at   | AT2G20370   | 3.26E-03 | 0.82262990  | 0.00000000  | 1.05042790  | 0.29634285  |
| 265415_at   | AT2G20890   | 2.76E-04 | -0.46741772 | -0.00000048 | -0.49737787 | 0.13102722  |
| 265385_at   | AT2G20900   | 8.93E-04 | 0.32739258  | 0.00000000  | 0.28903675  | -0.25454140 |
| 264014_at   | AT2G21210   | 1.50E-03 | -1.55826900 | 0.00000048  | -1.86419300 | -0.09607506 |
| 263761_at   | AT2G21330   | 7.08E-04 | -0.65956545 | 0.00000000  | -0.56756306 | 0.28030014  |
| 263749_at   | AT2G21520   | 7.05E-04 | 0.65039350  | 0.00000000  | 0.52958345  | -0.06250286 |
| 263765_at   | AT2G21540   | 1.21E-03 | -0.60618780 | 0.00000000  | -0.62094283 | -0.07208586 |
| 263517_at   | AT2G21620   | 1.86E-03 | 0.84250784  | 0.00000048  | 0.78705690  | 0.19451046  |
| 257432_at   | AT2G21850   | 2.64E-03 | 0.57147360  | 0.00000000  | 0.54791236  | -0.16287279 |
| 263893_at   | AT2G21900   | 2.22E-03 | 0.83651160  | 0.00000000  | 0.44944048  | -0.47190213 |
| 263880_at   | AT2G21960   | 2.11E-04 | -0.59954740 | -0.00000024 | -0.67816450 | 0.03783894  |
| 263869_at   | AT2G22000   | 2.52E-03 | -0.17532897 | -0.00000048 | -0.24771547 | -0.06849337 |
| 263429_at   | AT2G22250   | 1.62E-03 | 0.36104584  | 0.00000000  | 0.27766370  | 0.19129562  |
| 264044_at   | AT2G22480   | 1.08E-03 | 0.78944063  | -0.00000048 | 0.69583225  | -0.05864000 |
| 264000_at   | AT2G22500   | 3.26E-03 | 1.92303560  | 0.00000000  | 1.93790960  | 0.19559431  |
| 266825_at   | AT2G22890   | 2.93E-03 | -0.46838188 | 0.00000024  | -0.63395930 | 0.03928495  |
| 267288_at   | AT2G23680   | 2.14E-03 | 1.90658570  | 0.00000000  | 1.86229040  | 0.02071619  |
| 267298_at   | AT2G23760   | 2.35E-03 | -0.70110800 | 0.00000000  | -0.91075230 | -0.31861448 |
| 266001_at   | AT2G24150   | 3.94E-03 | -0.47286034 | 0.00000000  | -0.33150816 | 0.07568693  |
| 266000_at   | AT2G24180   | 1.08E-04 | 1.20649810  | 0.00000048  | 1.09506270  | -0.09357452 |
| 263788_at   | AT2G24580   | 3.67E-03 | -0.42639350 | 0.00000024  | -0.48488760 | 0.40241623  |
| 263800_at   | AT2G24600   | 1.29E-03 | 1.33660130  | 0.00000000  | 1.01626780  | -0.50013730 |
| 263539_at   | AT2G24850   | 7.35E-04 | 4.28734500  | 0.00000048  | 3.87068460  | 0.33055067  |
| 264382_at   | AT2G25110   | 2.34E-03 | 1.32664970  | 0.00000000  | 1.47829390  | 0.27491808  |
| 264380_at   | AT2G25190   | 2.02E-03 | 0.35629750  | 0.00000000  | 0.41540194  | -0.14886642 |
| 265617_at   | AT2G25520   | 5.35E-04 | 0.79153967  | 0.00000000  | 0.94505215  | 0.08190298  |
| 257365_x_at | AT2G26020   | 1.67E-03 | 2.82654290  | 0.00000000  | 2.10409700  | -0.89009380 |
| 266845_at   | AT2G26110   | 1.95E-03 | -0.36684465 | 0.00000024  | -0.34771228 | -0.13418150 |
| 267380_at   | AT2G26170   | 2.27E-03 | 1.11097150  | 0.00000000  | 1.03611330  | 0.07257652  |
| 267381_at   | AT2G26190   | 2.67E-04 | 0.88864040  | -0.00000048 | 0.84370613  | -0.10253191 |
| 267374_at   | AT2G26230   | 1.18E-03 | 0.60957910  | -0.00000048 | 0.83876660  | 0.19461107  |
| 267400_at   | AT2G26240   | 1.48E-03 | 0.56347610  | 0.00000000  | 0.42183400  | -0.16890192 |
| 267377_at   | AT2G26250   | 5.58E-04 | -0.62299395 | 0.00000048  | -0.74158480 | -0.03257465 |
| 245042_at   | AT2G26540   | 2.84E-03 | -0.55187580 | -0.00000048 | -0.59593487 | -0.01285267 |
| 245027_at   | AT2G26550   | 1.06E-03 | -0.95745254 | 0.00000000  | -0.65177800 | 0.17985344  |
| 267610_at   | AT2G26650   | 3.09E-04 | 0.51963090  | -0.00000024 | 0.22740674  | -0.06369567 |
| 265628_at   | AT2G27290   | 3.43E-03 | -0.73850536 | -0.00000048 | -0.96162940 | -0.37732935 |
| 265620_at   | AT2G27310   | 5.69E-04 | 1.02007560  | 0.00000000  | 0.57681750  | 0.05644870  |
| 265665_at   | AT2G27420   | 1.82E-03 | -0.16483092 | 0.00000000  | -0.18266726 | 0.16134524  |
| 266261_at   | AT2G27580   | 1.13E-03 | 0.81936836  | 0.00000000  | 0.56183050  | 0.12360025  |
| 266247_at   | AT2G27660   | 4.06E-03 | 1.21769170  | 0.00000024  | 1.30430530  | -0.05816531 |
| 264063_at   | AT2G27900   | 3.18E-03 | 0.36847878  | -0.00000000 | 0.44296694  | -0.10296440 |
| 266158_at   | AT2G28070   | 1.11E-03 | -0.24516940 | 0.00000024  | -0.19732523 | 0.12313914  |
| 265276_at   | AT2G28400   | 3.05E-04 | 1.70371940  | 0.00000000  | 1.34999300  | 0.10247827  |
| 264078_at   | AT2G28470   | 9.55E-04 | -0.79894066 | -0.00000048 | -0.65721130 | -0.04713011 |
| 266782_at   | AT2G29120   | 1.19E-03 | 1.57772590  | 0.00000000  | 1.47436240  | -0.01675177 |
| 266277_at   | AT2G29310   | 8.26E-04 | -1.24756000 | 0.00000000  | -1.18435480 | 0.06439257  |
| 266292_at   | AT2G29350   | 3.40E-03 | 2.52078150  | -0.00000024 | 2.57328130  | 0.27783870  |
| 266289_at   | AT2G29390   | 1.34E-03 | -0.29044724 | 0.00000048  | -0.24389744 | -0.00348902 |
| 266273_at   | AT2G29410   | 2.87E-03 | 0.67879750  | 0.00000000  | 0.71023273  | 0.00624132  |
| 266267_at   | AT2G29460   | 9.78E-04 | 3.72704460  | -0.00000024 | 3.29705670  | 0.34596348  |
| 266835_at   | AT2G29990   | 1.89E-03 | 1.77923250  | 0.00000000  | 1.77321340  | 0.13075209  |
| 267301_at   | AT2G30110   | 1.95E-03 | 0.56605196  | 0.00000048  | 0.51884794  | 0.20281649  |
| 267300_at   | AT2G30140   | 1.36E-03 | 1.87731790  | 0.00000048  | 1.82287500  | 0.28511715  |

|             |           |          |             |             |             |             |
|-------------|-----------|----------|-------------|-------------|-------------|-------------|
| 267247_at   | AT2G30170 | 3.93E-03 | -0.41604853 | -0.00000048 | -0.62809370 | 0.15337849  |
| 255869_at   | AT2G30270 | 6.83E-04 | 0.27849580  | 0.00000048  | 0.23802567  | 0.04727507  |
| 267471_at   | AT2G30390 | 2.38E-03 | -0.69453764 | 0.00000000  | -0.61034440 | 0.05024576  |
| 267496_at   | AT2G30550 | 3.96E-03 | 2.01494400  | 0.00000000  | 1.59902570  | -0.14289045 |
| 267202_s_at | AT2G31020 | 3.72E-03 | 0.92103386  | -0.00000024 | 0.59122870  | -0.07843256 |
| 267152_at   | AT2G31040 | 7.71E-04 | -0.85526180 | 0.00000048  | -0.85392190 | -0.00562191 |
| 266481_at   | AT2G31070 | 2.81E-04 | -0.71027994 | 0.00000000  | -0.83135750 | 0.02045584  |
| 263249_at   | AT2G31360 | 5.26E-04 | -0.54254913 | 0.00000048  | -0.36743880 | 0.23669400  |
| 263426_at   | AT2G31570 | 7.55E-04 | 0.56111430  | -0.00000048 | 0.72122480  | -0.06005192 |
| 263478_at   | AT2G31880 | 1.27E-03 | 1.98693470  | 0.00000000  | 2.17169800  | 0.00010204  |
| 263471_at   | AT2G31890 | 4.01E-03 | -0.68109536 | -0.00000048 | -0.66779780 | -0.03947496 |
| 263472_at   | AT2G31955 | 3.05E-03 | 0.85052824  | 0.00000048  | 0.91549635  | 0.06201887  |
| 265728_at   | AT2G31990 | 7.73E-05 | 0.78085136  | 0.00000000  | 1.18853000  | -0.35079312 |
| 265725_at   | AT2G32030 | 1.59E-03 | 1.03261780  | 0.00000024  | 0.83807470  | -0.23024893 |
| 265723_at   | AT2G32140 | 3.40E-04 | 1.63016150  | 0.00000000  | 2.07383420  | -0.01488948 |
| 265679_at   | AT2G32240 | 8.26E-04 | 1.16997200  | 0.00000000  | 0.89951990  | -0.09189606 |
| 267061_at   | AT2G32480 | 9.90E-04 | -0.45936870 | -0.00000048 | -0.67792270 | 0.09706783  |
| 267549_at   | AT2G32640 | 2.03E-03 | -0.90832260 | 0.00000000  | -0.70648193 | 0.21919203  |
| 267546_at   | AT2G32680 | 1.37E-03 | 2.86740450  | 0.00000024  | 3.09125140  | 0.34773684  |
| 267599_at   | AT2G32850 | 2.28E-04 | 0.24207830  | 0.00000000  | 0.23612976  | -0.07476711 |
| 245166_at   | AT2G33170 | 2.11E-04 | 0.46443510  | 0.00000000  | 0.51482487  | -0.13419700 |
| 255798_at   | AT2G33255 | 3.20E-04 | -0.49452686 | 0.00000000  | -0.42471933 | 0.15489817  |
| 255816_at   | AT2G33470 | 1.61E-03 | 0.57567310  | 0.00000000  | 0.58428526  | 0.16230583  |
| 255845_at   | AT2G33600 | 3.70E-03 | 0.52705810  | 0.00000024  | 0.54772234  | 0.22466755  |
| 255797_at   | AT2G33630 | 3.52E-03 | 0.84710790  | 0.00000000  | 0.80339860  | 0.07842016  |
| 267452_at   | AT2G33860 | 2.53E-04 | -0.72588970 | -0.00000048 | -0.50740814 | 0.03647995  |
| 267023_at   | AT2G34250 | 2.61E-03 | 0.90756800  | 0.00000048  | 0.81218624  | 0.01441765  |
| 266995_at   | AT2G34500 | 1.08E-04 | 1.37035180  | 0.00000000  | 1.18657160  | 0.02567172  |
| 266956_at   | AT2G34510 | 5.48E-04 | -0.73491144 | 0.00000000  | -0.61993694 | 0.26743317  |
| 266905_at   | AT2G34560 | 1.43E-03 | -0.92259550 | 0.00000000  | -0.82498740 | -0.05844212 |
| 267310_at   | AT2G34680 | 4.10E-04 | -0.94694900 | -0.00000048 | -0.80907774 | -0.11981916 |
| 267430_at   | AT2G34860 | 3.38E-04 | -0.51840020 | -0.00000048 | -0.49885654 | 0.15804672  |
| 267412_at   | AT2G34940 | 1.94E-04 | 0.61213875  | 0.00000000  | 0.86618160  | -0.41228200 |
| 267413_at   | AT2G34960 | 1.10E-03 | 0.82646203  | -0.00000024 | 0.61402090  | 0.01336980  |
| 266621_at   | AT2G35450 | 1.55E-03 | -0.77418900 | 0.00000000  | -0.50694010 | -0.17730951 |
| 266638_at   | AT2G35490 | 1.83E-04 | -0.32551765 | 0.00000048  | -0.33761024 | 0.04948282  |
| 265845_at   | AT2G35610 | 5.89E-04 | 0.76764490  | 0.00000000  | 0.57705880  | -0.05732441 |
| 263947_at   | AT2G35820 | 3.46E-03 | -0.48921490 | 0.00000000  | -0.39859462 | -0.27309490 |
| 263948_at   | AT2G35980 | 3.52E-03 | 2.97289040  | 0.00000024  | 2.63842300  | -0.45438123 |
| 263287_at   | AT2G36145 | 1.95E-03 | -1.20578240 | 0.00000000  | -1.35642480 | 0.31665993  |
| 263906_at   | AT2G36250 | 2.40E-05 | -0.78241110 | 0.00000048  | -0.49887990 | 0.09246063  |
| 263928_at   | AT2G36330 | 4.62E-04 | 0.73299074  | 0.00000024  | 0.60971930  | -0.19160843 |
| 263846_at   | AT2G36990 | 2.85E-03 | -0.78788850 | 0.00000000  | -0.80633545 | -0.08702898 |
| 265446_at   | AT2G37110 | 6.11E-04 | 1.00090740  | 0.00000048  | 1.15097620  | 0.10573387  |
| 265967_at   | AT2G37450 | 1.02E-03 | -0.95263770 | 0.00000000  | -0.90328145 | 0.23992872  |
| 267170_at   | AT2G37585 | 2.71E-03 | -0.84020543 | 0.00000000  | -0.86814570 | -0.24860382 |
| 267165_at   | AT2G37710 | 1.36E-03 | 1.76874160  | 0.00000048  | 1.71941470  | -0.00141382 |
| 267181_at   | AT2G37760 | 1.53E-03 | 1.16016600  | 0.00000000  | 1.08669300  | -0.02079535 |
| 266807_at   | AT2G37790 | 3.33E-03 | -0.64813540 | 0.00000000  | -0.30740047 | 0.16058111  |
| 267142_at   | AT2G38290 | 7.38E-04 | 1.55936340  | 0.00000048  | 1.41546920  | -0.11327124 |
| 267027_at   | AT2G38330 | 2.67E-04 | -0.59937096 | -0.00000048 | -0.62754583 | -0.15023184 |
| 267036_at   | AT2G38465 | 2.50E-03 | -0.96205020 | 0.00000024  | -1.36498480 | -0.33947540 |
| 267028_at   | AT2G38470 | 1.83E-03 | 2.08914000  | -0.00000048 | 1.83498810  | -0.30437756 |
| 266398_at   | AT2G38680 | 1.38E-03 | -0.42029548 | -0.00000024 | -0.29084563 | -0.00023770 |
| 266419_at   | AT2G38760 | 3.86E-03 | -0.53829430 | 0.00000000  | -0.79050374 | 0.04792786  |
| 266167_at   | AT2G38860 | 8.12E-04 | 2.22982220  | -0.00000048 | 2.19375560  | -0.16194630 |
| 266170_at   | AT2G39050 | 1.52E-03 | 0.58439540  | 0.00000024  | 0.58057880  | -0.01500964 |
| 266968_at   | AT2G39360 | 3.82E-03 | 0.64408064  | 0.00000000  | 0.18424750  | -0.28257704 |
| 266979_at   | AT2G39470 | 1.69E-05 | -1.02217820 | -0.00000048 | -1.12021160 | -0.00233698 |
| 266985_at   | AT2G39550 | 3.30E-03 | 0.60696700  | 0.00000024  | 0.33543515  | -0.11995912 |
| 267623_at   | AT2G39650 | 3.12E-03 | 0.86082840  | 0.00000000  | 0.79922460  | 0.11422539  |
| 245088_at   | AT2G39850 | 1.95E-03 | -0.95686746 | -0.00000024 | -0.92051480 | -0.20178413 |
| 267359_at   | AT2G40020 | 1.19E-03 | -0.31950712 | 0.00000000  | -0.53842163 | -0.01928663 |
| 263379_at   | AT2G40140 | 2.45E-03 | 1.84061190  | 0.00000048  | 1.84808350  | 0.17998362  |
| 263830_at   | AT2G40260 | 1.09E-03 | -0.35441900 | 0.00000000  | -0.47050428 | -0.20900631 |
| 263804_at   | AT2G40270 | 3.93E-03 | 1.22604470  | 0.00000048  | 1.28619770  | -0.02644062 |
| 255827_at   | AT2G40600 | 1.84E-03 | 0.93684864  | 0.00000000  | 0.81404495  | -0.23787642 |
| 255878_at   | AT2G40620 | 4.13E-03 | -0.52810025 | 0.00000000  | -0.75991750 | -0.28899193 |
| 267069_at   | AT2G41010 | 4.41E-04 | 1.37343690  | 0.00000000  | 1.01489190  | -0.01078129 |
| 267073_at   | AT2G41160 | 1.61E-03 | 0.56587744  | -0.00000024 | 0.50362780  | -0.12934089 |
| 266424_at   | AT2G41330 | 1.64E-03 | -0.48609972 | 0.00000000  | -0.48846793 | -0.08362389 |
| 266371_at   | AT2G41410 | 9.76E-04 | 2.05779650  | 0.00000048  | 2.20511250  | -0.19145012 |
| 267103_at   | AT2G41490 | 4.32E-04 | 0.94959070  | 0.00000000  | 0.81709766  | 0.22135448  |
| 260496_at   | AT2G41700 | 1.58E-03 | 0.69936466  | 0.00000000  | 0.42832088  | -0.20740986 |
| 267537_at   | AT2G41880 | 1.59E-03 | 0.63339186  | 0.00000000  | 0.37175940  | -0.33485390 |
| 267580_at   | AT2G41990 | 1.33E-03 | -1.21546270 | 0.00000048  | -1.30713460 | -0.27783012 |
| 267635_at   | AT2G42220 | 9.55E-04 | -0.77082350 | 0.00000000  | -0.84472750 | -0.01292896 |
| 265876_at   | AT2G42290 | 1.79E-03 | -0.38671374 | -0.00000024 | -0.24802756 | -0.05234218 |
| 265883_at   | AT2G42310 | 2.53E-04 | 0.15280294  | 0.00000048  | 0.22211266  | -0.09612989 |
| 265855_at   | AT2G42390 | 1.43E-03 | 0.49096918  | 0.00000000  | 0.33239650  | -0.21917725 |
| 265269_at   | AT2G42950 | 1.78E-05 | 0.48689985  | -0.00000024 | 0.59643410  | -0.11533856 |
| 265260_at   | AT2G43000 | 1.26E-03 | 2.81101900  | 0.00000000  | 2.47356700  | 0.17568088  |
| 266439_s_at | AT2G43200 | 1.97E-03 | -0.86230090 | 0.00000000  | -0.78678560 | 0.01079130  |
| 260545_at   | AT2G43350 | 1.85E-03 | 0.49707603  | 0.00000000  | 0.51317690  | -0.10193157 |
| 260542_at   | AT2G43560 | 3.63E-03 | -0.48742150 | 0.00000048  | -0.62964580 | 0.25775576  |
| 260556_at   | AT2G43620 | 2.50E-03 | 1.46714260  | 0.00000000  | 1.41803740  | 0.06741786  |
| 267214_at   | AT2G43970 | 8.45E-04 | 0.89769983  | 0.00000000  | 0.87038470  | -0.20212650 |
| 267189_at   | AT2G44180 | 4.78E-04 | 0.77245855  | 0.00000048  | 0.81764126  | -0.21456242 |
| 267344_at   | AT2G44230 | 1.48E-03 | -0.82936500 | 0.00000024  | -0.79090880 | 0.14679360  |

|             |             |          |             |             |             |             |
|-------------|-------------|----------|-------------|-------------|-------------|-------------|
| 267342_at   | AT2G44520   | 8.26E-04 | 0.70175457  | -0.00000024 | 0.55550670  | 0.14832210  |
| 266821_at   | AT2G44840   | 2.86E-03 | 0.78511095  | 0.00000000  | 0.79251194  | -0.00334501 |
| 267500_s_at | AT2G44890 / | 2.14E-03 | 1.47220660  | 0.00000000  | 1.29265500  | 0.25036025  |
| 266104_at   | AT2G45150   | 2.00E-03 | -0.46580482 | -0.00000024 | -0.21295261 | 0.10313416  |
| 251395_at   | AT2G45470   | 1.71E-03 | -0.90480330 | 0.00000000  | -0.94490385 | 0.06648922  |
| 266925_at   | AT2G45740   | 1.46E-03 | -0.72758675 | -0.00000048 | -0.59024334 | 0.09229183  |
| 266922_s_at | AT2G45950 / | 3.09E-03 | -0.38950825 | 0.00000000  | -0.56667470 | -0.03771210 |
| 250604_at   | AT2G45960 / | 7.61E-05 | 1.17395350  | 0.00000000  | 1.12293390  | -0.31533860 |
| 266898_at   | AT2G45990   | 7.06E-04 | -0.36326647 | 0.00000000  | -0.18402481 | 0.16324997  |
| 266596_at   | AT2G46150   | 7.48E-04 | 1.14599230  | 0.00000024  | 1.29801800  | 0.29565500  |
| 266555_at   | AT2G46270   | 1.11E-04 | 0.94333170  | 0.00000000  | 0.80680320  | -0.09318113 |
| 263783_at   | AT2G46400   | 9.33E-04 | 2.77642680  | 0.00000000  | 2.84412670  | 0.16090060  |
| 265460_at   | AT2G46600   | 4.18E-03 | 0.85437536  | 0.00000000  | 0.93780470  | -0.56927395 |
| 265450_at   | AT2G46620   | 5.67E-04 | 1.25551080  | -0.00000024 | 1.34383200  | -0.11620379 |
| 266767_at   | AT2G46910   | 9.25E-04 | -0.86157750 | 0.00000048  | -1.11419370 | -0.08551502 |
| 266749_at   | AT2G47060   | 5.41E-04 | 0.21813393  | 0.00000000  | 0.22675419  | -0.09189367 |
| 266761_at   | AT2G47130   | 3.82E-04 | 2.18633940  | -0.00000024 | 2.13219240  | -0.08557677 |
| 260581_at   | AT2G47190   | 7.71E-04 | 0.63740873  | 0.00000000  | 0.46984982  | -0.15435600 |
| 260530_at   | AT2G47320   | 1.30E-03 | 0.30514240  | 0.00000048  | 0.44077778  | 0.03775072  |
| 260579_at   | AT2G47380   | 7.40E-04 | 0.84885790  | 0.00000048  | 0.73994540  | 0.21543694  |
| 245175_at   | AT2G47470   | 2.16E-03 | 1.37170270  | -0.00000048 | 1.58629850  | 0.45496560  |
| 245174_at   | AT2G47500   | 4.14E-03 | -0.38407730 | 0.00000024  | -0.29725910 | 0.10856724  |
| 251234_s_at | AT2G47650 / | 4.21E-03 | 0.83809376  | -0.00000048 | 1.08889530  | 0.28228950  |
| 266461_at   | AT2G47730   | 1.49E-06 | 1.11112210  | 0.00000000  | 1.03855470  | 0.01369524  |
| 266464_at   | AT2G47800   | 3.32E-03 | 2.36115400  | 0.00000024  | 2.52204080  | 0.48239970  |
| 266505_at   | AT2G47830   | 1.18E-03 | 0.50566506  | 0.00000024  | 0.29470180  | -0.10274410 |
| 266460_at   | AT2G47930   | 2.08E-03 | -1.19340990 | 0.00000000  | -1.23881500 | -0.29158830 |
| 265773_at   | AT2G48070   | 1.49E-03 | -0.67945194 | 0.00000048  | -0.76267670 | -0.12929726 |
| 259271_at   | AT3G01170   | 9.04E-05 | 0.65084696  | -0.00000024 | 0.57341003  | -0.11802936 |
| 258949_at   | AT3G01370   | 1.88E-04 | -0.53101730 | 0.00000048  | -0.65690994 | 0.00735569  |
| 259193_at   | AT3G01480   | 1.07E-03 | -0.31350850 | -0.00000048 | -0.52921534 | 0.25316525  |
| 259191_at   | AT3G01720   | 4.09E-04 | 1.34873770  | -0.00000024 | 1.40322160  | 0.16801786  |
| 258997_at   | AT3G01810   | 1.29E-03 | -0.63137674 | -0.00000048 | -0.50032760 | 0.01487160  |
| 258947_at   | AT3G01830   | 2.09E-03 | 3.89635470  | 0.00000000  | 3.43186100  | -0.03429556 |
| 258860_at   | AT3G02050   | 3.83E-03 | -0.48546076 | 0.00000000  | -0.36798334 | 0.10739040  |
| 256328_at   | AT3G02360   | 7.79E-04 | 0.87983704  | -0.00000048 | 0.91402340  | 0.23296547  |
| 258493_at   | AT3G02555   | 1.46E-03 | -0.24139047 | -0.00000024 | -0.13991427 | 0.18948483  |
| 258481_at   | AT3G02600   | 1.93E-03 | -0.39318180 | 0.00000000  | -0.34245777 | 0.04214954  |
| 258495_at   | AT3G02690   | 3.85E-03 | -0.67740200 | 0.00000048  | -0.73795795 | 0.04808283  |
| 258607_at   | AT3G02730   | 1.43E-03 | -0.55339956 | 0.00000000  | -0.47608995 | 0.01971149  |
| 258614_at   | AT3G02770   | 6.13E-04 | 1.52958200  | 0.00000048  | 1.40966370  | 0.03777504  |
| 257536_at   | AT3G02800   | 1.55E-03 | 0.93641330  | 0.00000000  | 0.45092654  | -0.37505865 |
| 258606_at   | AT3G02840   | 7.94E-04 | 2.13793560  | 0.00000000  | 1.83330250  | -0.17339015 |
| 259043_at   | AT3G03440   | 4.17E-03 | 0.59781240  | 0.00000000  | 0.68348430  | 0.04640102  |
| 259198_at   | AT3G03610   | 2.20E-03 | 0.89196587  | 0.00000000  | 0.83434390  | -0.02810121 |
| 258588_s_at | AT3G04120   | 1.85E-03 | 0.90292835  | -0.00000048 | 0.96241236  | 0.38902378  |
| 258593_at   | AT3G04480   | 3.47E-03 | 0.78940580  | -0.00000048 | 0.90760420  | 0.17485094  |
| 258599_at   | AT3G04520   | 2.58E-04 | -0.26349258 | 0.00000000  | -0.24160337 | 0.11399126  |
| 258792_at   | AT3G04640   | 3.52E-03 | 1.37275890  | 0.00000048  | 1.04708100  | 0.00963187  |
| 2585791_at  | AT3G04720   | 3.95E-03 | 2.04577350  | 0.00000000  | 1.87877800  | 0.02528572  |
| 258804_at   | AT3G04760   | 1.71E-03 | -0.47760534 | -0.00000048 | -0.45138168 | 0.03220987  |
| 259093_at   | AT3G04860   | 2.04E-03 | -0.62831880 | 0.00000000  | -0.52609250 | -0.11083102 |
| 259092_at   | AT3G04870   | 6.37E-04 | -0.38932467 | -0.00000048 | -0.26333237 | 0.12394428  |
| 259308_at   | AT3G05180   | 6.62E-04 | -0.91124034 | 0.00000000  | -0.80318740 | 0.12789440  |
| 259297_at   | AT3G05360   | 3.81E-03 | 0.86858700  | 0.00000024  | 0.49587893  | -0.08713985 |
| 259105_at   | AT3G05500   | 3.44E-03 | 1.12603660  | 0.00000000  | 1.34410330  | -0.00321770 |
| 258735_at   | AT3G05880   | 2.73E-03 | -0.71080494 | 0.00000000  | -0.70756720 | -0.15270376 |
| 258750_at   | AT3G05910   | 2.89E-03 | -1.01861240 | 0.00000000  | -0.86196613 | -0.22356892 |
| 258563_at   | AT3G05970   | 5.34E-04 | 1.16012950  | 0.00000000  | 1.01840020  | 0.05878401  |
| 256402_at   | AT3G06130   | 5.76E-05 | -0.65816855 | -0.00000024 | -0.64037920 | -0.12504530 |
| 256418_at   | AT3G06160   | 2.83E-03 | -0.63174963 | -0.00000024 | -0.48976254 | 0.15059710  |
| 258536_at   | AT3G06540   | 2.90E-03 | 0.58546734  | -0.00000048 | 0.43197870  | 0.15702677  |
| 258522_at   | AT3G06660   | 3.65E-03 | -0.34620930 | 0.00000048  | -0.40719604 | -0.06985450 |
| 258535_at   | AT3G06750   | 5.12E-04 | -0.87000847 | 0.00000048  | -0.77601050 | -0.00120211 |
| 258524_at   | AT3G06810   | 7.20E-05 | 0.51446486  | 0.00000000  | 0.45676756  | 0.17707992  |
| 258555_at   | AT3G06860   | 1.96E-03 | 0.78052664  | 0.00000000  | 0.83052635  | 0.25039530  |
| 258823_at   | AT3G07200   | 1.31E-03 | -0.43881488 | 0.00000000  | -0.17064285 | 0.08392906  |
| 259019_at   | AT3G07370   | 3.26E-03 | 0.65361450  | 0.00000024  | 0.50237940  | -0.03372955 |
| 259065_at   | AT3G07520   | 2.69E-04 | 0.97571087  | 0.00000024  | 0.83899020  | -0.22403050 |
| 259021_at   | AT3G07540   | 4.14E-03 | -0.57895540 | 0.00000000  | -0.70071316 | -0.12871647 |
| 259251_at   | AT3G07600   | 2.97E-03 | 1.04351620  | 0.00000000  | 0.71533130  | -0.41679263 |
| 259256_at   | AT3G07680   | 1.72E-03 | 0.80675983  | 0.00000000  | 0.86668680  | 0.11393786  |
| 259255_at   | AT3G07690   | 5.29E-04 | 0.49893498  | -0.00000024 | 0.42423130  | -0.22249556 |
| 259228_at   | AT3G07720   | 2.28E-04 | 1.03969050  | -0.00000048 | 1.06608300  | 0.02874613  |
| 258643_at   | AT3G08010   | 1.68E-03 | -0.52178670 | 0.00000000  | -0.70857525 | -0.04096985 |
| 258676_at   | AT3G08600   | 2.57E-04 | -0.79892540 | 0.00000000  | -0.58730936 | 0.14229488  |
| 258678_at   | AT3G08690   | 3.04E-04 | 0.61875250  | -0.00000048 | 0.67084074  | 0.07371140  |
| 258682_at   | AT3G08720   | 3.83E-03 | 1.48986200  | 0.00000000  | 1.25870470  | 0.07923293  |
| 258982_at   | AT3G08870   | 2.80E-04 | 1.72082710  | 0.00000024  | 1.38752700  | -0.54229975 |
| 258989_at   | AT3G08920   | 3.05E-04 | -1.10400150 | 0.00000000  | -1.09416100 | -0.14158583 |
| 258984_at   | AT3G08970   | 3.32E-03 | 1.58775160  | 0.00000000  | 1.45938940  | -0.15024805 |
| 259213_at   | AT3G09010   | 2.79E-03 | 1.80010700  | 0.00000000  | 1.58673430  | -0.09558153 |
| 259037_at   | AT3G09350   | 1.98E-03 | 0.97483300  | -0.00000024 | 0.97900724  | 0.26898885  |
| 259033_at   | AT3G09410   | 9.57E-04 | 2.23642830  | 0.00000000  | 1.82937100  | 0.04099107  |
| 257535_at   | AT3G09490   | 2.34E-04 | 1.76608800  | 0.00000000  | 1.54170160  | -0.13051677 |
| 258708_at   | AT3G09580   | 4.50E-04 | -0.78712130 | 0.00000000  | -1.01090100 | -0.15460396 |
| 258696_at   | AT3G09650   | 2.56E-03 | -0.45028472 | 0.00000000  | -0.47865010 | -0.02855396 |
| 258650_at   | AT3G09830   | 1.27E-03 | 1.27585840  | 0.00000000  | 1.34744450  | 0.13725185  |
| 258941_at   | AT3G09940   | 3.80E-03 | 2.91797880  | 0.00000024  | 2.16729450  | -0.00707555 |



|             |           |          |             |             |             |             |
|-------------|-----------|----------|-------------|-------------|-------------|-------------|
| 258931_at   | AT3G10010 | 3.25E-03 | 0.48601103  | 0.00000000  | 0.50047493  | -0.00852418 |
| 258927_at   | AT3G10160 | 4.00E-04 | -0.63763070 | 0.00000048  | -0.62089490 | 0.11767292  |
| 259150_at   | AT3G10320 | 1.69E-04 | 0.95410633  | -0.00000024 | 0.57374120  | -0.08256960 |
| 259148_at   | AT3G10350 | 2.29E-03 | -0.20099354 | 0.00000000  | -0.17702866 | 0.12254429  |
| 259156_at   | AT3G10380 | 9.26E-04 | 0.58597660  | 0.00000000  | 0.57761240  | 0.10460997  |
| 258923_at   | AT3G10450 | 3.18E-05 | -0.36147547 | -0.00000024 | -0.10544968 | 0.04294682  |
| 258915_at   | AT3G10640 | 7.24E-05 | 1.38174150  | 0.00000000  | 1.19161270  | 0.07023025  |
| 258759_at   | AT3G10800 | 1.14E-03 | 0.80887460  | -0.00000048 | 0.58245850  | 0.12356424  |
| 256441_at   | AT3G10940 | 2.49E-04 | -1.57902220 | 0.00000000  | -1.08018800 | 0.08169174  |
| 256431_s_at | AT3G11010 | 6.41E-04 | 2.58760930  | 0.00000000  | 2.39524080  | 0.09861851  |
| 256446_at   | AT3G11110 | 2.86E-03 | -0.61222935 | -0.00000024 | -0.76004650 | -0.18170714 |
| 256256_at   | AT3G11230 | 9.08E-04 | 0.60268974  | 0.00000048  | 0.65205574  | 0.11584473  |
| 256255_at   | AT3G11280 | 2.95E-04 | 1.29087920  | 0.00000000  | 1.04624700  | -0.02645445 |
| 256252_at   | AT3G11340 | 8.98E-05 | 4.60054300  | 0.00000000  | 4.04159450  | 0.24977064  |
| 258786_at   | AT3G11820 | 2.38E-04 | 1.62170410  | -0.00000048 | 1.48153540  | 0.04113531  |
| 258787_at   | AT3G11840 | 7.70E-05 | 1.88739590  | 0.00000000  | 1.58552790  | -0.31836700 |
| 258731_at   | AT3G11880 | 1.47E-03 | 0.51291750  | 0.00000000  | 0.63460255  | 0.14787102  |
| 256275_at   | AT3G12110 | 5.75E-05 | -0.91219260 | 0.00000024  | -1.01461270 | 0.03548288  |
| 256263_at   | AT3G12290 | 6.62E-04 | 0.47672224  | 0.00000000  | 0.43531704  | 0.17387724  |
| 256245_at   | AT3G12580 | 9.25E-04 | 2.09307480  | 0.00000000  | 1.68318200  | 0.07338572  |
| 257700_at   | AT3G12740 | 2.54E-03 | 1.43690540  | 0.00000000  | 1.25317430  | -0.06483126 |
| 257690_at   | AT3G12830 | 5.87E-04 | 1.52980280  | -0.00000024 | 1.12537960  | -0.22063780 |
| 257547_at   | AT3G13000 | 3.16E-03 | -1.38650770 | 0.00000000  | -1.21855000 | -0.24284363 |
| 257861_at   | AT3G13050 | 2.92E-03 | 0.55315590  | 0.00000000  | 0.43535614  | -0.24648333 |
| 257184_at   | AT3G13090 | 2.09E-03 | 0.71082616  | 0.00000000  | 0.64695430  | 0.04970527  |
| 257185_at   | AT3G13100 | 1.66E-05 | 2.64061360  | -0.00000024 | 2.60138230  | -0.02547216 |
| 257190_at   | AT3G13120 | 2.68E-04 | -0.61935140 | 0.00000000  | -0.47171068 | 0.15956402  |
| 257657_at   | AT3G13235 | 6.75E-04 | 0.94480800  | 0.00000000  | 1.00800990  | 0.09524775  |
| 257662_at   | AT3G13320 | 1.97E-03 | 0.30436802  | 0.00000000  | 0.17361593  | -0.18781757 |
| 257708_at   | AT3G13330 | 2.21E-03 | 1.36110450  | -0.00000048 | 1.61758570  | 0.28492832  |
| 256981_at   | AT3G13380 | 4.22E-04 | 1.82216690  | -0.00000024 | 1.95310350  | 0.55922604  |
| 256786_at   | AT3G13740 | 2.85E-03 | -0.58597900 | 0.00000000  | -0.58646250 | 0.16552925  |
| 256787_at   | AT3G13790 | 1.40E-03 | 1.37499480  | 0.00000048  | 1.43096450  | 0.11525822  |
| 257606_at   | AT3G13870 | 7.23E-04 | 0.57032824  | 0.00000000  | 0.57360170  | -0.04962921 |
| 258201_at   | AT3G13910 | 1.30E-03 | 1.81203250  | 0.00000024  | 1.44347000  | -0.26669955 |
| 258203_at   | AT3G13950 | 2.23E-03 | 2.24434690  | 0.00000024  | 2.22730880  | -0.10513282 |
| 258362_at   | AT3G14280 | 1.22E-03 | 0.90449050  | 0.00000000  | 0.79402566  | -0.08092952 |
| 258355_at   | AT3G14330 | 5.56E-04 | -1.04558250 | 0.00000024  | -0.78311850 | 0.17841148  |
| 257279_at   | AT3G14430 | 2.86E-04 | 0.66975546  | 0.00000000  | 0.51468610  | -0.05358553 |
| 257277_at   | AT3G14470 | 2.13E-04 | 1.61313720  | -0.00000024 | 1.46353100  | -0.30092740 |
| 258063_at   | AT3G14620 | 7.68E-04 | 1.04779050  | 0.00000048  | 0.91554403  | -0.30211258 |
| 258113_at   | AT3G14650 | 1.70E-03 | -0.93287134 | 0.00000000  | -0.62634850 | 0.39282942  |
| 256547_at   | AT3G14840 | 3.08E-03 | 0.94381620  | 0.00000000  | 0.98479940  | 0.07840443  |
| 256856_at   | AT3G15110 | 9.26E-04 | -0.58680344 | 0.00000000  | -0.80191660 | 0.07063437  |
| 256854_at   | AT3G15180 | 2.34E-03 | 0.48392320  | 0.00000024  | 0.45089960  | -0.06830716 |
| 258382_at   | AT3G15355 | 3.21E-03 | 0.03455925  | 0.00000000  | 0.43377113  | -0.09485984 |
| 257294_at   | AT3G15570 | 1.56E-03 | -1.10849550 | 0.00000000  | -0.92231610 | 0.08621740  |
| 258269_at   | AT3G15690 | 4.01E-03 | -0.61336994 | 0.00000048  | -0.61089610 | 0.02455664  |
| 258250_at   | AT3G15850 | 5.43E-04 | -1.22515110 | 0.00000000  | -1.25883480 | -0.03340149 |
| 258331_at   | AT3G15980 | 3.60E-03 | 0.82496880  | -0.00000048 | 0.88010980  | 0.07570839  |
| 258285_at   | AT3G16140 | 2.64E-03 | -0.30969095 | 0.00000000  | -0.46873140 | -0.04337072 |
| 259330_at   | AT3G16270 | 2.89E-03 | 0.70584820  | 0.00000000  | 0.52557420  | 0.10348177  |
| 259379_at   | AT3G16350 | 2.17E-03 | -0.50699090 | 0.00000024  | -0.75859520 | -0.03715253 |
| 257206_at   | AT3G16530 | 1.07E-03 | 2.56411460  | 0.00000000  | 2.31516220  | -0.07346439 |
| 257895_at   | AT3G16950 | 1.42E-04 | -0.98492956 | 0.00000000  | -0.68607400 | 0.11535072  |
| 257888_at   | AT3G16990 | 7.64E-04 | 0.98947480  | 0.00000000  | 0.85458040  | -0.02391243 |
| 258439_at   | AT3G17240 | 2.05E-03 | 1.22670840  | 0.00000000  | 1.40908430  | 0.34077263  |
| 257295_at   | AT3G17420 | 3.04E-03 | 1.50158140  | 0.00000000  | 1.65627410  | 0.64358664  |
| 258409_at   | AT3G17640 | 3.82E-03 | -1.38524100 | 0.00000000  | -1.34110520 | -0.23131537 |
| 258377_at   | AT3G17690 | 9.66E-04 | 0.72814370  | 0.00000000  | 0.65268920  | -0.02854466 |
| 258351_at   | AT3G17700 | 2.23E-03 | 1.08307030  | 0.00000000  | 0.63389490  | -0.33542442 |
| 258156_at   | AT3G18050 | 4.10E-03 | -0.71764610 | -0.00000048 | -0.62874890 | 0.04534817  |
| 257734_at   | AT3G18370 | 2.16E-03 | 1.05951260  | 0.00000000  | 0.98189783  | -0.10550475 |
| 257751_at   | AT3G18690 | 3.09E-04 | 0.46940947  | 0.00000000  | 0.05306959  | -0.25358963 |
| 257750_at   | AT3G18800 | 3.88E-03 | -0.94714713 | 0.00000000  | -0.97303960 | -0.28702188 |
| 256657_at   | AT3G18860 | 9.58E-05 | 0.22168207  | 0.00000000  | 0.31660604  | -0.07297564 |
| 256653_at   | AT3G18870 | 3.79E-04 | -0.43816948 | 0.00000000  | -0.50407980 | 0.14421773  |
| 256892_at   | AT3G19000 | 1.93E-03 | -0.97554970 | -0.00000048 | -0.88263680 | 0.21450186  |
| 256922_at   | AT3G19010 | 1.32E-03 | 1.93466090  | 0.00000048  | 1.69087840  | 0.08327150  |
| 257038_at   | AT3G19260 | 5.02E-04 | 1.25568490  | 0.00000000  | 1.21234320  | -0.00613117 |
| 258025_at   | AT3G19480 | 4.60E-04 | -0.89655230 | 0.00000000  | -0.98691535 | 0.14540386  |
| 256627_at   | AT3G19970 | 4.27E-03 | 0.89776590  | -0.00000024 | 0.77343440  | -0.03329063 |
| 256624_at   | AT3G19990 | 9.36E-04 | 0.23259139  | 0.00000000  | 0.27924514  | -0.22422099 |
| 257113_at   | AT3G20130 | 2.44E-03 | -0.63621210 | -0.00000024 | -0.72393584 | -0.33736850 |
| 257088_at   | AT3G20510 | 4.11E-03 | 1.25822160  | 0.00000048  | 1.38617990  | -0.10124874 |
| 256698_at   | AT3G20680 | 3.97E-03 | -1.06283570 | 0.00000048  | -1.08219050 | -0.11831427 |
| 256805_at   | AT3G20930 | 3.25E-03 | -0.73937535 | 0.00000000  | -0.87240600 | -0.04100919 |
| 256969_at   | AT3G21080 | 1.16E-03 | 1.85607480  | 0.00000000  | 1.97264050  | 0.21017694  |
| 258037_at   | AT3G21230 | 4.01E-03 | 2.21468830  | 0.00000000  | 1.69570260  | 0.25839972  |
| 257540_at   | AT3G21520 | 3.23E-04 | 1.88500810  | 0.00000000  | 1.66477870  | -0.45020150 |
| 258173_at   | AT3G21630 | 4.26E-04 | 0.96416664  | 0.00000048  | 0.81170607  | -0.22986078 |
| 256795_at   | AT3G22110 | 2.07E-03 | 0.19341469  | 0.00000000  | 0.32854557  | 0.14037466  |
| 256793_at   | AT3G22160 | 1.19E-03 | 1.59245970  | 0.00000000  | 1.41495700  | -0.07061124 |
| 256937_at   | AT3G22620 | 3.74E-03 | 2.12191100  | 0.00000024  | 1.79960510  | 0.50486300  |
| 257759_at   | AT3G23070 | 3.01E-03 | -0.59892035 | -0.00000048 | -0.82295680 | 0.16302325  |
| 257763_s_at | AT3G23110 | 3.75E-03 | 2.29614160  | 0.00000024  | 2.21079830  | 0.22641945  |
| 258102_at   | AT3G23600 | 3.88E-03 | 0.83655980  | 0.00000000  | 0.89427090  | 0.18617249  |
| 257202_at   | AT3G23750 | 1.46E-03 | -0.49923038 | 0.00000000  | -0.62799454 | -0.20772648 |
| 257171_at   | AT3G23760 | 7.23E-04 | -0.62584760 | -0.00000048 | -0.69173837 | 0.28409290  |

|             |             |          |             |             |             |             |
|-------------|-------------|----------|-------------|-------------|-------------|-------------|
| 256914_at   | AT3G23880   | 4.18E-03 | -1.34379240 | 0.00000024  | -1.55000570 | 0.18841410  |
| 257252_at   | AT3G24170   | 3.79E-03 | 0.52501200  | 0.00000000  | 0.57873870  | 0.09145117  |
| 257249_at   | AT3G24180   | 1.71E-03 | 1.12462760  | -0.00000048 | 1.15738820  | 0.15252447  |
| 257168_at   | AT3G24430   | 9.24E-04 | -0.91297720 | 0.00000000  | 1.06499200  | -0.03299761 |
| 258133_at   | AT3G24500   | 8.08E-06 | 1.20950940  | 0.00000000  | 1.11339500  | 0.08279014  |
| 257598_at   | AT3G24800   | 1.54E-03 | -0.66134690 | 0.00000000  | 0.71863604  | -0.15496588 |
| 257591_at   | AT3G24900   | 1.78E-03 | 0.80687930  | 0.00000024  | 0.92238927  | -0.00908065 |
| 257909_at   | AT3G25480   | 4.10E-03 | -0.55267644 | 0.00000048  | -0.55637810 | 0.14383078  |
| 256756_at   | AT3G25610   | 5.54E-04 | 2.00463000  | -0.00000024 | 1.87542920  | -0.04097796 |
| 256728_at   | AT3G25660   | 3.61E-04 | -0.69029950 | 0.00000000  | -0.51534130 | 0.10936356  |
| 257642_at   | AT3G25710   | 4.02E-03 | -0.86731243 | 0.00000000  | -0.54738570 | 0.39140534  |
| 257644_at   | AT3G25780   | 3.33E-03 | 2.39845320  | 0.00000024  | 1.83635900  | 0.11741781  |
| 258072_at   | AT3G26090   | 2.50E-04 | 0.95563220  | 0.00000000  | 0.66359687  | -0.09722590 |
| 257623_at   | AT3G26210   | 3.23E-03 | 3.13242820  | 0.00000000  | 2.93255140  | 0.27727938  |
| 256869_at   | AT3G26420 / | 7.45E-04 | 0.95499610  | 0.00000000  | 0.91443586  | -0.05658031 |
| 256883_at   | AT3G26440   | 1.48E-04 | 1.87846350  | -0.00000024 | 2.06026100  | 0.32081437  |
| 256877_at   | AT3G26470   | 2.66E-03 | 1.08237270  | 0.00000024  | 1.26694870  | -0.07219982 |
| 252170_at   | AT3G26560 / | 3.72E-03 | 3.35010050  | -0.00000048 | 3.45226720  | 0.32590675  |
| 257314_at   | AT3G26590   | 2.31E-05 | 1.10306980  | -0.00000024 | 1.03307320  | 0.41061497  |
| 257612_at   | AT3G26600   | 9.93E-04 | 1.33525370  | 0.00000000  | 1.19088700  | 0.06233096  |
| 258259_s_at | AT3G26820 / | 1.11E-04 | 2.02375320  | 0.00000000  | 1.67807080  | 0.16526198  |
| 258277_at   | AT3G26830   | 1.50E-03 | 4.80949800  | 0.00000000  | 4.49168000  | 0.45205498  |
| 256753_at   | AT3G27160   | 4.62E-04 | -0.70854425 | 0.00000000  | -0.57874200 | 0.02259731  |
| 257174_at   | AT3G27190   | 2.69E-03 | 0.38495398  | 0.00000024  | 0.44480420  | 0.03595853  |
| 257713_at   | AT3G27380   | 2.69E-03 | 0.85928390  | 0.00000000  | 0.77592990  | 0.27419280  |
| 257228_at   | AT3G27890   | 8.66E-05 | 0.86245920  | 0.00000048  | 0.75987150  | -0.03049517 |
| 256851_at   | AT3G27930   | 2.91E-03 | 0.11663222  | 0.00000000  | 0.06467629  | -0.04149580 |
| 256576_at   | AT3G28210   | 8.08E-04 | 1.71421340  | 0.00000000  | 1.78284880  | 0.09078050  |
| 256633_at   | AT3G28340   | 3.90E-03 | 2.09693100  | 0.00000024  | 1.71907380  | -0.02822495 |
| 257902_at   | AT3G28450   | 3.11E-04 | 0.77045010  | 0.00000000  | 0.68457747  | -0.07021809 |
| 256593_at   | AT3G28510   | 4.88E-05 | 3.39449550  | 0.00000000  | 3.42110400  | 0.18713236  |
| 256596_at   | AT3G28540   | 2.17E-03 | 2.02979180  | 0.00000000  | 2.19648890  | 0.18041658  |
| 256989_at   | AT3G28580   | 1.19E-05 | 2.64418240  | 0.00000000  | 2.40914370  | 0.13213778  |
| 256583_at   | AT3G28850   | 4.13E-03 | 0.58322550  | 0.00000000  | 0.57919740  | -0.25977826 |
| 257139_at   | AT3G28890   | 7.32E-04 | 0.35148406  | 0.00000000  | 0.55588200  | 0.06027122  |
| 258002_at   | AT3G28930   | 3.75E-03 | 2.03476720  | 0.00000000  | 1.76163530  | 0.05965376  |
| 258000_at   | AT3G28940   | 2.59E-03 | 1.18737840  | 0.00000000  | 1.15136200  | 0.21404552  |
| 258001_at   | AT3G28950   | 2.71E-03 | 0.87331960  | 0.00000048  | 0.87491894  | 0.31076002  |
| 257773_at   | AT3G29185   | 8.77E-04 | -0.85378313 | 0.00000048  | -0.93917656 | 0.00237465  |
| 257774_at   | AT3G29250   | 1.06E-03 | 1.07730960  | 0.00000000  | 1.17175750  | -0.10938549 |
| 256735_at   | AT3G29400   | 2.49E-03 | 0.48805475  | 0.00000000  | 0.51071607  | -0.13313246 |
| 252724_at   | AT3G43540   | 1.31E-03 | -0.64759350 | 0.00000048  | -0.59030010 | 0.32570505  |
| 252707_at   | AT3G43790   | 2.49E-03 | -0.43783950 | 0.00000000  | -0.30832790 | -0.02083850 |
| 252652_at   | AT3G44720   | 6.32E-04 | 1.80043840  | -0.00000024 | 1.77271800  | 0.19468140  |
| 246340_s_at | AT3G44860 / | 3.32E-03 | 2.24639940  | 0.00000000  | 1.57086850  | -0.32247472 |
| 252602_at   | AT3G45040   | 4.10E-03 | 0.71207240  | 0.00000000  | 0.60223820  | -0.30262090 |
| 252615_at   | AT3G45230   | 4.03E-04 | -0.50039910 | 0.00000000  | -0.52535440 | -0.00604105 |
| 252572_at   | AT3G45290   | 1.50E-04 | 2.15162600  | 0.00000000  | 1.93483920  | 0.30313350  |
| 252587_at   | AT3G45620   | 1.03E-03 | 1.67256780  | 0.00000000  | 1.73048500  | 0.19774961  |
| 252592_at   | AT3G45640 / | 9.29E-05 | 0.95456123  | 0.00000000  | 0.96165276  | -0.20506096 |
| 252529_at   | AT3G46490   | 6.46E-04 | -0.63410950 | -0.00000024 | -0.62904050 | 0.14404368  |
| 252473_s_at | AT3G46610 / | 3.20E-03 | -0.80055140 | 0.00000000  | -0.80031323 | 0.14473772  |
| 252481_at   | AT3G46630   | 2.07E-03 | -0.71075060 | 0.00000048  | -0.77308800 | 0.00926828  |
| 252482_at   | AT3G46670   | 4.36E-04 | -0.94511150 | -0.00000024 | -0.87388086 | 0.26852465  |
| 252450_s_at | AT3G47090 / | 4.11E-03 | 1.30631180  | 0.00000024  | 1.21889690  | 0.03122735  |
| 252451_at   | AT3G47100   | 7.77E-04 | -0.30306530 | 0.00000000  | -0.31715596 | -0.15052414 |
| 252459_s_at | AT3G47220 / | 2.02E-03 | 0.32952880  | 0.00000000  | 0.19974422  | 0.09210396  |
| 252411_at   | AT3G47430   | 1.79E-03 | -0.96042250 | -0.00000048 | -1.05374740 | 0.12202215  |
| 252417_at   | AT3G47480   | 3.02E-03 | 2.95997800  | 0.00000024  | 3.06984140  | 0.05297518  |
| 252421_at   | AT3G47540   | 3.65E-04 | 3.38695670  | 0.00000024  | 3.11541130  | 0.49610066  |
| 252431_at   | AT3G47700   | 2.98E-04 | 0.40673614  | 0.00000024  | 0.18467712  | -0.01741242 |
| 252403_at   | AT3G48080   | 1.41E-03 | 1.89450550  | -0.00000024 | 1.91023970  | -0.20957446 |
| 252373_at   | AT3G48090   | 5.22E-05 | 2.04099320  | 0.00000000  | 2.45916130  | 0.61194180  |
| 252353_at   | AT3G48200   | 2.22E-03 | -0.76458406 | 0.00000000  | -0.64519310 | 0.29186583  |
| 252365_at   | AT3G48350   | 4.17E-03 | -0.61317350 | -0.00000024 | -0.71836520 | -0.01567571 |
| 252366_at   | AT3G48420   | 1.45E-03 | -1.27088020 | 0.00000048  | -1.37057160 | -0.09127140 |
| 252345_at   | AT3G48640   | 2.88E-03 | 2.19671080  | 0.00000000  | 2.15277960  | -0.18723607 |
| 252346_at   | AT3G48650   | 4.94E-04 | 2.19513340  | 0.00000000  | 2.26614200  | -0.04872441 |
| 252334_at   | AT3G48850   | 3.50E-03 | 1.67315580  | 0.00000024  | 1.45565510  | 0.08272386  |
| 252296_at   | AT3G48970   | 2.68E-03 | -0.60544970 | 0.00000024  | -0.79744315 | -0.08964324 |
| 252280_at   | AT3G49260   | 2.01E-04 | -0.94926430 | 0.00000000  | -1.11252780 | -0.05355120 |
| 252309_at   | AT3G49340   | 1.81E-03 | 1.74563860  | -0.00000024 | 1.49901510  | 0.28132534  |
| 252310_at   | AT3G49350   | 1.61E-03 | 1.02340750  | -0.00000024 | 0.92817070  | 0.03435135  |
| 252313_at   | AT3G49390   | 4.11E-04 | 0.70559263  | 0.00000000  | 0.93958380  | 0.30431460  |
| 252261_at   | AT3G49500   | 4.48E-04 | -0.20710468 | 0.00000048  | -0.32070112 | -0.11261511 |
| 252278_at   | AT3G49530   | 1.31E-03 | 1.06942560  | 0.00000024  | 1.21398930  | 0.00846839  |
| 252265_at   | AT3G49620   | 9.53E-04 | 3.33806180  | 0.00000000  | 2.13800530  | -0.27314758 |
| 252234_at   | AT3G49780   | 9.47E-04 | 2.21881100  | 0.00000000  | 1.73635290  | -0.15611935 |
| 252223_at   | AT3G49850   | 3.63E-03 | -0.25095700 | 0.00000000  | -0.22057605 | 0.03600597  |
| 252214_at   | AT3G50260   | 7.82E-04 | 1.14864350  | 0.00000000  | 1.17404030  | 0.11440849  |
| 252199_at   | AT3G50270   | 1.93E-03 | -0.36757946 | 0.00000048  | -0.60354996 | -0.07368565 |
| 252165_at   | AT3G50550   | 2.06E-03 | 0.66929126  | 0.00000024  | 0.40715456  | -0.09068322 |
| 252184_at   | AT3G50660   | 4.26E-03 | -0.83500910 | 0.00000000  | -1.06352400 | 0.15694809  |
| 252181_at   | AT3G50685   | 8.94E-05 | -1.08964350 | 0.00000000  | -1.10494800 | -0.07906294 |
| 252136_at   | AT3G50770   | 8.43E-05 | 2.87921290  | 0.00000000  | 2.46873710  | -0.40418910 |
| 252132_at   | AT3G50790   | 5.82E-05 | -0.73186445 | -0.00000048 | -0.73150660 | -0.05600739 |
| 252130_at   | AT3G50820   | 8.00E-04 | -0.65113830 | 0.00000000  | -0.68196250 | -0.01508108 |
| 252131_at   | AT3G50930   | 1.01E-03 | 2.83207500  | 0.00000024  | 2.87615010  | 0.08546805  |
| 252126_at   | AT3G50950   | 8.34E-04 | 0.79262540  | 0.00000000  | 0.76238537  | -0.28073550 |

|           |           |          |             |             |             |             |
|-----------|-----------|----------|-------------|-------------|-------------|-------------|
| 252098_at | AT3G51330 | 9.37E-04 | 2.55210640  | 0.00000000  | 2.53519100  | -0.10803366 |
| 252092_at | AT3G51420 | 2.30E-03 | -0.94010260 | 0.00000000  | -1.04969690 | 0.04558039  |
| 252117_at | AT3G51430 | 2.39E-03 | 1.51885180  | 0.00000000  | 1.49777700  | -0.05384541 |
| 252068_at | AT3G51440 | 2.96E-03 | 1.66097830  | -0.00000024 | 1.49987600  | -0.38610458 |
| 252116_at | AT3G51510 | 7.56E-04 | -0.85280610 | -0.00000048 | -0.94389250 | -0.09915243 |
| 252112_at | AT3G51580 | 2.64E-03 | 0.56109570  | 0.00000000  | 0.57612085  | 0.03259873  |
| 246305_at | AT3G51890 | 1.17E-06 | 1.23941760  | -0.00000048 | 1.09196200  | -0.31739210 |
| 256682_at | AT3G52200 | 1.53E-03 | 0.47348928  | -0.00000048 | 0.56645820  | 0.04319334  |
| 256680_at | AT3G52230 | 3.86E-03 | -0.53350353 | 0.00000000  | -0.46338797 | 0.00791407  |
| 252053_at | AT3G52400 | 5.59E-04 | 1.83628370  | -0.00000024 | 1.70067260  | -0.23308325 |
| 252060_at | AT3G52430 | 1.18E-03 | 3.59896470  | -0.00000024 | 3.48153110  | 0.59488800  |
| 252047_at | AT3G52490 | 2.50E-03 | -0.33743906 | 0.00000024  | -0.19440746 | 0.30625010  |
| 252008_at | AT3G52610 | 2.03E-03 | -0.35390520 | 0.00000048  | -0.49081635 | -0.07498884 |
| 252023_at | AT3G52920 | 5.33E-04 | -0.44686030 | 0.00000000  | -0.50330377 | 0.32703876  |
| 251969_at | AT3G53130 | 1.99E-03 | -0.43594265 | 0.00000000  | -0.41872072 | 0.29105043  |
| 251970_at | AT3G53150 | 7.73E-04 | 1.26262660  | 0.00000024  | 1.41366740  | -0.22995949 |
| 251972_at | AT3G53170 | 1.73E-03 | -0.58437680 | 0.00000000  | -0.36844206 | -0.06483316 |
| 251975_at | AT3G53230 | 6.58E-05 | 2.06491610  | 0.00000000  | 1.92692850  | 0.11557841  |
| 251930_at | AT3G53780 | 1.83E-04 | 0.73629236  | 0.00000048  | 0.66152050  | -0.04292917 |
| 251910_at | AT3G53810 | 3.06E-03 | 1.17422820  | 0.00000000  | 0.92726517  | -0.06205225 |
| 251917_at | AT3G53970 | 1.65E-03 | 0.24528980  | -0.00000048 | 0.28389835  | -0.13465977 |
| 251932_at | AT3G54010 | 2.92E-04 | 0.57644176  | 0.00000000  | 0.54511120  | 0.07995367  |
| 251884_at | AT3G54150 | 9.89E-05 | 2.20109130  | 0.00000000  | 2.10229400  | -0.43382406 |
| 251847_at | AT3G54640 | 5.23E-04 | 2.48794080  | 0.00000000  | 2.29057500  | 0.10969257  |
| 251860_at | AT3G54660 | 2.23E-05 | -0.45235348 | 0.00000048  | -0.43461275 | 0.09038067  |
| 251839_at | AT3G54950 | 1.25E-04 | 1.11679790  | 0.00000000  | 1.26757740  | 0.57714130  |
| 251823_at | AT3G55080 | 8.34E-05 | -0.44562100 | -0.00000048 | -0.62386630 | -0.15437770 |
| 251832_at | AT3G55150 | 2.75E-03 | 1.09065510  | 0.00000000  | 0.68671010  | -0.30462550 |
| 251790_at | AT3G55470 | 1.17E-04 | 1.44027850  | -0.00000024 | 1.21541600  | 0.03543711  |
| 251759_at | AT3G55630 | 1.82E-03 | -1.04720350 | 0.00000048  | -1.07917790 | 0.23769140  |
| 251761_at | AT3G55700 | 2.58E-03 | 0.84675956  | 0.00000000  | 0.68612860  | 0.16257739  |
| 251762_at | AT3G55800 | 9.88E-05 | -0.58919144 | -0.00000048 | -0.70407295 | 0.15772343  |
| 251769_at | AT3G55950 | 6.46E-04 | 1.99907400  | -0.00000024 | 1.86559580  | -0.00348115 |
| 251744_at | AT3G56010 | 3.05E-03 | -0.30411577 | 0.00000000  | -0.33019638 | 0.41675568  |
| 251736_at | AT3G56130 | 2.67E-04 | -0.62169740 | 0.00000048  | -0.73073290 | -0.07846117 |
| 251720_at | AT3G56160 | 2.03E-03 | -0.84513760 | 0.00000000  | -0.57709860 | 0.15040755  |
| 251739_at | AT3G56170 | 2.13E-03 | 1.22935390  | 0.00000000  | 1.32138200  | 0.15550923  |
| 251705_at | AT3G56400 | 3.01E-03 | 2.13761430  | -0.00000048 | 1.87803320  | -0.26823664 |
| 251684_at | AT3G56410 | 1.48E-03 | 0.66945650  | 0.00000000  | 0.23755598  | -0.44208765 |
| 251701_at | AT3G56650 | 2.66E-03 | -0.37967920 | 0.00000000  | -0.49484062 | 0.10327721  |
| 246293_at | AT3G56710 | 3.06E-03 | 1.31904320  | 0.00000000  | 1.13274340  | -0.14817238 |
| 251659_at | AT3G57090 | 1.43E-04 | 0.57550955  | 0.00000000  | 0.65455246  | -0.11954498 |
| 251670_at | AT3G57190 | 2.31E-03 | -0.73510550 | 0.00000000  | -0.71765160 | -0.02301693 |
| 251672_at | AT3G57230 | 4.24E-03 | 0.42432594  | 0.00000000  | 0.26274943  | -0.08371544 |
| 251673_at | AT3G57240 | 2.03E-03 | 3.85970350  | 0.00000000  | 3.78656000  | 0.30115938  |
| 251624_at | AT3G57280 | 1.74E-03 | 0.95107126  | 0.00000000  | 0.79982760  | -0.17430496 |
| 251649_at | AT3G57330 | 1.74E-04 | 1.14603280  | 0.00000048  | 0.93924570  | -0.38000324 |
| 251633_at | AT3G57460 | 7.60E-04 | 1.92118050  | 0.00000000  | 1.58956190  | -0.32200290 |
| 251621_at | AT3G57700 | 2.31E-03 | 1.22268920  | -0.00000024 | 1.02079340  | -0.23045278 |
| 251647_at | AT3G57770 | 4.17E-03 | -0.74757195 | 0.00000000  | -0.68870735 | -0.14371014 |
| 251612_at | AT3G57950 | 1.93E-03 | 0.54326415  | 0.00000000  | 0.75920770  | -0.05788231 |
| 251526_at | AT3G58640 | 3.47E-03 | 0.53252983  | 0.00000048  | 0.48214293  | -0.16858149 |
| 251507_at | AT3G59080 | 2.83E-03 | 0.55182600  | -0.00000024 | 0.39038014  | -0.45638967 |
| 251521_at | AT3G59420 | 3.54E-03 | -0.54491854 | 0.00000000  | -0.43994212 | 0.04149461  |
| 251475_at | AT3G59660 | 3.51E-04 | 1.54866120  | 0.00000024  | 1.43471340  | 0.11884975  |
| 251479_at | AT3G59700 | 7.90E-05 | 1.63035870  | 0.00000000  | 1.43331150  | -0.12240338 |
| 251461_at | AT3G59780 | 4.29E-03 | -0.77822210 | 0.00000000  | -0.75688170 | -0.17845535 |
| 251449_at | AT3G59920 | 1.62E-04 | 0.47255564  | 0.00000000  | 0.46007776  | -0.11695623 |
| 251456_at | AT3G60120 | 3.56E-03 | 0.85986710  | -0.00000024 | 0.66393950  | -0.06196189 |
| 251406_at | AT3G60260 | 2.77E-03 | 1.12442300  | 0.00000000  | 1.20313740  | 0.22433567  |
| 251414_at | AT3G60370 | 6.52E-04 | -0.59888360 | 0.00000000  | -0.63705444 | 0.05696011  |
| 251400_at | AT3G60420 | 3.00E-04 | 3.21592950  | 0.00000048  | 3.10922670  | 0.23666954  |
| 251370_at | AT3G60450 | 1.87E-04 | 2.12911500  | 0.00000000  | 2.08170220  | 0.17826033  |
| 251419_at | AT3G60470 | 3.14E-05 | 1.18696310  | 0.00000000  | 1.31585600  | -0.11436462 |
| 251386_at | AT3G60800 | 1.72E-03 | 0.76243640  | 0.00000048  | 0.85720253  | 0.21343708  |
| 251390_at | AT3G60860 | 1.85E-03 | 0.57293270  | 0.00000000  | 0.45149470  | -0.05841017 |
| 251353_at | AT3G61080 | 1.73E-03 | -0.84203150 | 0.00000000  | -0.96301913 | 0.08727741  |
| 251336_at | AT3G61190 | 7.20E-05 | 2.78399730  | 0.00000000  | 2.66871550  | -0.00089169 |
| 251330_at | AT3G61550 | 2.08E-03 | -0.97881603 | 0.00000000  | -1.18538860 | -0.22325134 |
| 251289_at | AT3G61830 | 1.10E-03 | -0.51151466 | 0.00000000  | -0.49272943 | -0.11993957 |
| 251243_at | AT3G61870 | 2.39E-03 | -0.63993216 | 0.00000000  | -0.73135376 | 0.11439085  |
| 251218_at | AT3G62410 | 1.14E-03 | -0.70548200 | 0.00000000  | -0.85168743 | -0.05199146 |
| 251222_at | AT3G62580 | 4.03E-03 | 0.87573195  | 0.00000000  | 0.71608160  | 0.20113945  |
| 251191_at | AT3G62590 | 1.83E-03 | 0.46906996  | 0.00000024  | 0.36063385  | -0.44460750 |
| 251227_at | AT3G62700 | 9.70E-05 | -0.48536300 | -0.00000048 | -0.38207197 | 0.22950983  |
| 251232_at | AT3G62780 | 2.64E-03 | 1.22556970  | 0.00000000  | 0.96634220  | -0.29754280 |
| 251200_at | AT3G63010 | 3.32E-03 | 1.15614580  | 0.00000024  | 1.49423120  | 0.34591770  |
| 251205_at | AT3G63080 | 1.99E-04 | 0.85677340  | 0.00000048  | 0.64997290  | -0.18303728 |
| 251150_at | AT3G63120 | 1.75E-03 | -0.73425840 | 0.00000000  | -0.59124040 | -0.20178223 |
| 251157_at | AT3G63140 | 1.97E-04 | -0.72718570 | 0.00000048  | -0.80781840 | 0.15883636  |
| 251176_at | AT3G63380 | 9.07E-04 | 2.64082480  | 0.00000000  | 2.47510340  | -0.16230583 |
| 251121_at | AT3G63420 | 1.10E-03 | 1.10302730  | 0.00000024  | 0.81531715  | 0.01424575  |
| 251179_at | AT3G63460 | 3.73E-04 | 0.56794550  | 0.00000048  | 0.59262896  | 0.08984327  |
| 251120_at | AT3G63490 | 2.43E-03 | -0.53317976 | 0.00000000  | -0.40659142 | 0.25385952  |
| 255709_at | AT4G00180 | 1.22E-03 | -0.57476280 | 0.00000048  | -0.50509050 | -0.13079596 |
| 255691_at | AT4G00370 | 3.43E-03 | -0.53390410 | 0.00000048  | -0.36538792 | 0.16725492  |
| 255674_at | AT4G00430 | 3.56E-03 | -0.72344400 | -0.00000048 | -0.48384714 | 0.27519083  |
| 255681_at | AT4G00550 | 1.58E-03 | 0.48445868  | 0.00000000  | 0.42022014  | -0.20757055 |
| 255630_at | AT4G00700 | 1.19E-03 | 2.45365140  | 0.00000024  | 2.39689600  | -0.12204886 |

|             |           |          |             |             |             |             |
|-------------|-----------|----------|-------------|-------------|-------------|-------------|
| 255637_at   | AT4G00750 | 2.72E-03 | -0.66430500 | -0.00000024 | -0.93854310 | -0.21454310 |
| 255660_at   | AT4G00755 | 1.24E-03 | -0.82484436 | 0.00000000  | -0.80960060 | 0.25761510  |
| 255645_at   | AT4G00880 | 2.10E-03 | -0.74977636 | 0.00000000  | -0.65767000 | 0.01511383  |
| 255627_at   | AT4G00955 | 1.04E-03 | 0.79676770  | 0.00000000  | 0.64312506  | -0.26929522 |
| 255599_at   | AT4G01010 | 1.51E-04 | 1.43889140  | 0.00000024  | 1.43660640  | -0.18754101 |
| 255572_at   | AT4G01050 | 5.53E-04 | -0.58099794 | 0.00000000  | -0.45282364 | 0.09117937  |
| 255607_at   | AT4G01130 | 3.44E-03 | -1.31268690 | 0.00000000  | -1.42910430 | -0.31796074 |
| 255623_at   | AT4G01310 | 1.53E-03 | -0.63639164 | 0.00000048  | -0.57397795 | 0.22914553  |
| 255624_at   | AT4G01370 | 2.15E-03 | 1.10359950  | 0.00000000  | 0.96992730  | 0.12568188  |
| 255621_at   | AT4G01390 | 3.06E-03 | -0.89134410 | 0.00000000  | -0.11866951 | 0.59447720  |
| 255595_at   | AT4G01700 | 4.16E-03 | 2.41453650  | -0.00000024 | 2.39454030  | 0.07109642  |
| 255596_at   | AT4G01720 | 3.46E-03 | 1.27173800  | 0.00000000  | 0.98345065  | -0.07760239 |
| 255560_at   | AT4G02030 | 1.78E-03 | 0.39549685  | -0.00000048 | 0.25006008  | -0.09904623 |
| 255506_at   | AT4G02130 | 6.12E-04 | -0.75572490 | 0.00000000  | -0.88419724 | -0.36590195 |
| 255479_at   | AT4G02380 | 1.33E-03 | 2.77530530  | 0.00000048  | 2.57729960  | -0.34600973 |
| 255503_at   | AT4G02420 | 3.33E-04 | 1.25294730  | 0.00000000  | 1.14250330  | -0.23962665 |
| 255499_at   | AT4G02730 | 2.21E-03 | 0.69623900  | 0.00000000  | 0.65685964  | 0.14473080  |
| 255452_at   | AT4G02880 | 4.22E-03 | 0.12893248  | 0.00000048  | 0.17362880  | -0.33626533 |
| 255410_at   | AT4G03100 | 1.84E-03 | -0.51365470 | -0.00000048 | -0.36819530 | 0.28979874  |
| 255436_at   | AT4G03150 | 4.19E-03 | -0.91022680 | 0.00000000  | -0.72747900 | -0.02102757 |
| 255402_at   | AT4G03205 | 2.25E-03 | -0.51328635 | 0.00000000  | -0.27554345 | 0.15390301  |
| 255406_at   | AT4G03450 | 1.32E-03 | 2.82311580  | -0.00000024 | 2.62782670  | -0.18301797 |
| 255348_at   | AT4G03820 | 3.61E-03 | 0.95350456  | 0.00000000  | 0.97039130  | 0.13155007  |
| 255319_at   | AT4G04220 | 6.09E-04 | 2.37281500  | -0.00000024 | 2.14598900  | 0.15718412  |
| 255331_at   | AT4G04330 | 5.34E-04 | -1.03008990 | 0.00000048  | -1.01453020 | -0.15725088 |
| 255332_at   | AT4G04340 | 2.22E-03 | -0.70711565 | -0.00000048 | -0.69812630 | 0.01260710  |
| 255340_at   | AT4G04490 | 2.01E-04 | 2.41392100  | 0.00000000  | 2.29272250  | -0.20605826 |
| 255341_at   | AT4G04500 | 2.19E-03 | 2.53257230  | 0.00000024  | 2.68232540  | 0.00217223  |
| 255342_at   | AT4G04510 | 3.18E-05 | 0.70735526  | 0.00000000  | 1.18831560  | -0.00545454 |
| 255344_s_at | AT4G04540 | 3.62E-03 | 1.30816080  | 0.00000048  | 1.21240380  | -0.02728128 |
| 255301_at   | AT4G04800 | 4.15E-03 | 0.74469376  | 0.00000024  | 0.49257612  | -0.06892228 |
| 255298_at   | AT4G04840 | 1.61E-03 | -1.21389870 | 0.00000000  | -1.55127330 | -0.08756685 |
| 255277_at   | AT4G04890 | 6.92E-04 | -0.48979664 | 0.00000000  | -0.34573126 | -0.00690413 |
| 255308_at   | AT4G04910 | 2.80E-04 | 0.65307810  | -0.00000048 | 0.74622440  | 0.23617363  |
| 255280_at   | AT4G04960 | 8.53E-04 | 0.52583337  | 0.00000024  | 0.26709760  | 0.06006837  |
| 255265_at   | AT4G05190 | 4.16E-03 | -0.18932915 | 0.00000000  | -0.20629478 | 0.45051240  |
| 255243_at   | AT4G05590 | 3.07E-03 | 0.69628096  | 0.00000000  | 0.82168220  | -0.05921865 |
| 255193_at   | AT4G07400 | 5.08E-04 | -0.39330983 | 0.00000000  | -0.44914390 | -0.07914352 |
| 255151_at   | AT4G08180 | 4.11E-04 | 0.69468427  | -0.00000024 | 0.50027990  | 0.03161740  |
| 255117_s_at | AT4G08700 | 2.42E-03 | -0.21625924 | 0.00000000  | -0.11122489 | -0.00675750 |
| 255110_at   | AT4G08770 | 1.21E-04 | 2.55028200  | 0.00000000  | 2.77658990  | -0.01068759 |
| 255111_at   | AT4G08780 | 1.82E-03 | 1.17345900  | 0.00000024  | 0.86824536  | -0.07658458 |
| 255116_at   | AT4G08850 | 3.67E-04 | 1.39398570  | 0.00000000  | 1.42703960  | -0.14109468 |
| 255078_at   | AT4G09010 | 9.18E-04 | -0.69199276 | -0.00000048 | -0.82859707 | -0.05779171 |
| 255082_at   | AT4G09160 | 1.59E-03 | -0.59190370 | 0.00000024  | -0.72080300 | -0.35407520 |
| 255043_at   | AT4G09640 | 1.53E-03 | -0.50557400 | -0.00000024 | -0.34655166 | -0.10726857 |
| 255810_at   | AT4G10140 | 1.56E-03 | 0.46930170  | 0.00000048  | 0.46708155  | -0.02065420 |
| 255019_at   | AT4G10210 | 3.15E-03 | -0.18686199 | 0.00000024  | -0.23229504 | 0.04791546  |
| 254970_at   | AT4G10340 | 1.45E-04 | -0.03354073 | 0.00000048  | -0.05422449 | 0.05746651  |
| 254982_at   | AT4G10470 | 1.65E-03 | -0.45637798 | 0.00000000  | -0.52080107 | 0.45877218  |
| 254975_at   | AT4G10500 | 3.11E-03 | 3.01455600  | 0.00000000  | 3.09691520  | 0.73483420  |
| 254952_at   | AT4G10955 | 3.29E-04 | 1.27553800  | 0.00000000  | 1.04518530  | -0.20789933 |
| 254948_at   | AT4G11000 | 1.71E-03 | 0.60096980  | -0.00000024 | 0.53999950  | -0.38722944 |
| 254965_at   | AT4G11090 | 1.56E-03 | 0.19588375  | 0.00000000  | 0.19238424  | -0.04532766 |
| 254905_at   | AT4G11170 | 1.67E-03 | 0.65874790  | 0.00000024  | 0.73754334  | -0.18149662 |
| 254926_at   | AT4G11280 | 1.32E-03 | 2.16370530  | 0.00000024  | 2.04365830  | 0.56856130  |
| 254922_at   | AT4G11370 | 1.49E-03 | 1.47066430  | 0.00000024  | 1.14579150  | 0.08820319  |
| 254897_at   | AT4G11470 | 3.35E-04 | 0.55187510  | -0.00000024 | 0.19752765  | -0.07757044 |
| 254891_at   | AT4G11740 | 1.71E-03 | 0.56590080  | 0.00000000  | 0.33589650  | 0.00621748  |
| 254894_at   | AT4G11840 | 2.20E-03 | 1.85968280  | 0.00000024  | 1.16312840  | -0.05499721 |
| 254847_at   | AT4G11850 | 2.06E-04 | 1.45666050  | 0.00000024  | 1.13671370  | -0.06982517 |
| 254869_at   | AT4G11890 | 1.07E-03 | 3.20246600  | 0.00000000  | 3.07846300  | 0.31679726  |
| 254863_at   | AT4G11980 | 1.37E-03 | -0.47383046 | 0.00000048  | -0.56776667 | 0.15148067  |
| 254857_at   | AT4G12120 | 1.15E-03 | 0.98919510  | 0.00000000  | 0.87936830  | -0.13081002 |
| 254833_s_at | AT4G12280 | 3.00E-03 | 1.09479520  | 0.00000048  | 0.83135414  | -0.06642628 |
| 254835_s_at | AT4G12310 | 1.76E-04 | -0.81972504 | 0.00000048  | -0.94370080 | 0.31550837  |
| 254815_at   | AT4G12420 | 1.12E-03 | -1.01212070 | -0.00000048 | -0.96505930 | -0.20572281 |
| 254784_at   | AT4G12720 | 3.12E-04 | 2.18795540  | 0.00000000  | 2.13202950  | -0.02091885 |
| 254790_at   | AT4G12800 | 3.75E-03 | -0.04783344 | 0.00000000  | -0.19249153 | 0.11346388  |
| 254783_at   | AT4G12830 | 4.19E-03 | -1.46728610 | -0.00000048 | -1.45013930 | 0.17132092  |
| 254791_at   | AT4G12910 | 1.52E-03 | -0.49006940 | 0.00000000  | -0.35547304 | 0.15865421  |
| 254745_at   | AT4G13460 | 6.96E-04 | -0.43767880 | 0.00000000  | -0.53276160 | -0.17898369 |
| 254723_at   | AT4G13510 | 7.75E-04 | 1.48150540  | -0.00000048 | 1.18620060  | 0.05995894  |
| 254727_at   | AT4G13670 | 1.11E-03 | -0.41679573 | 0.00000048  | -0.62024640 | 0.02535725  |
| 254741_s_at | AT4G13900 | 5.40E-04 | 2.66355630  | 0.00000000  | 2.54558800  | 0.02889490  |
| 254284_at   | AT4G14210 | 2.67E-03 | -0.68160343 | 0.00000000  | -0.70682430 | -0.10828781 |
| 245329_at   | AT4G14365 | 1.21E-03 | 3.07922890  | 0.00000000  | 2.85572620  | 0.12710667  |
| 245611_at   | AT4G14390 | 3.23E-03 | 0.71241190  | 0.00000024  | 0.60503580  | -0.17658854 |
| 245566_at   | AT4G14610 | 1.24E-05 | 1.37624050  | 0.00000000  | 1.22987410  | -0.29774046 |
| 245315_at   | AT4G14800 | 2.17E-04 | 0.85410120  | 0.00000048  | 0.95463514  | 0.15518999  |
| 245396_at   | AT4G14870 | 4.10E-03 | -0.67790985 | 0.00000048  | -0.83656883 | -0.11282969 |
| 245298_at   | AT4G15010 | 2.93E-03 | 0.62679960  | 0.00000000  | 0.64831257  | 0.05198765  |
| 245545_at   | AT4G15280 | 3.70E-03 | 0.37292147  | 0.00000024  | 0.44891882  | 0.02279329  |
| 245289_at   | AT4G15470 | 7.39E-04 | 0.70384980  | 0.00000000  | 0.70063780  | 0.04522419  |
| 245317_at   | AT4G15610 | 1.73E-03 | 1.88682750  | 0.00000048  | 1.46122500  | 0.10424280  |
| 245291_at   | AT4G16155 | 3.40E-03 | -0.51512290 | 0.00000048  | -0.78270150 | -0.02068186 |
| 245393_at   | AT4G16260 | 3.21E-03 | 3.04622840  | 0.00000024  | 2.56969450  | 0.10448337  |
| 245338_at   | AT4G16442 | 3.98E-03 | -0.58913183 | 0.00000000  | -0.69681597 | -0.09907579 |
| 245318_at   | AT4G16980 | 2.32E-03 | -0.50692034 | 0.00000048  | -0.71863030 | -0.11895084 |

|             |           |          |             |             |             |             |
|-------------|-----------|----------|-------------|-------------|-------------|-------------|
| 245266_at   | AT4G17070 | 2.45E-03 | 1.58588080  | 0.00000000  | 1.23855260  | -0.26434207 |
| 245417_at   | AT4G17360 | 8.76E-04 | -1.01956870 | -0.00000024 | -1.17024920 | 0.13173366  |
| 245395_at   | AT4G17420 | 2.39E-03 | 0.44225073  | 0.00000000  | 0.42690277  | -0.15174246 |
| 245357_at   | AT4G17560 | 8.00E-04 | -0.60982084 | 0.00000000  | -0.50330020 | 0.13049030  |
| 245428_at   | AT4G17570 | 8.11E-04 | 0.57077456  | 0.00000000  | 0.57953690  | 0.20930862  |
| 245354_at   | AT4G17600 | 1.78E-03 | -0.55116940 | -0.00000048 | -0.63233566 | 0.24959326  |
| 245401_at   | AT4G17670 | 3.05E-03 | 1.44960600  | 0.00000000  | 1.66402050  | 0.27288938  |
| 245365_at   | AT4G17720 | 2.91E-03 | 1.34913250  | 0.00000048  | 1.38023900  | 0.17042351  |
| 254690_at   | AT4G17830 | 6.22E-05 | 0.85284233  | -0.00000048 | 0.83473396  | -0.02165222 |
| 254660_at   | AT4G18250 | 1.19E-05 | 2.80680660  | 0.00000024  | 2.44639870  | -0.23214817 |
| 254669_at   | AT4G18370 | 2.96E-04 | -0.89038086 | -0.00000048 | -0.93509390 | -0.06891441 |
| 254670_at   | AT4G18390 | 2.86E-03 | -0.83043240 | 0.00000000  | -0.81997110 | -0.10542059 |
| 254673_at   | AT4G18430 | 2.12E-03 | 2.60772000  | 0.00000000  | 2.39629750  | -0.03623390 |
| 254646_at   | AT4G18530 | 6.36E-04 | -0.42868543 | 0.00000024  | -0.25106573 | -0.07905459 |
| 254649_at   | AT4G18570 | 5.06E-04 | -1.09610220 | 0.00000000  | -1.01968530 | -0.27075660 |
| 254624_at   | AT4G18580 | 3.21E-05 | 0.84000635  | 0.00000024  | 0.71033790  | -0.06928706 |
| 254643_at   | AT4G18820 | 2.71E-03 | -0.37122846 | 0.00000000  | -0.24298239 | 0.13361740  |
| 254605_at   | AT4G18950 | 1.88E-03 | 0.54609275  | 0.00000000  | 0.47305298  | 0.00048113  |
| 254604_at   | AT4G19070 | 3.39E-03 | -0.49669957 | 0.00000048  | -0.28200245 | 0.01880407  |
| 254612_at   | AT4G19100 | 3.14E-03 | -0.72708370 | 0.00000000  | -0.84934900 | -0.15216350 |
| 254571_at   | AT4G19370 | 2.33E-04 | 2.34412860  | -0.00000024 | 1.71860310  | 0.14309049  |
| 254553_at   | AT4G19530 | 2.28E-03 | -0.95017815 | 0.00000000  | -1.22403760 | -0.02731276 |
| 254545_at   | AT4G19830 | 6.06E-04 | -0.79858350 | -0.00000048 | -1.04646920 | 0.23222542  |
| 254505_at   | AT4G19985 | 1.09E-03 | -0.61842610 | 0.00000000  | -0.61327980 | 0.13910866  |
| 254524_at   | AT4G20000 | 4.38E-04 | 1.47584370  | 0.00000024  | 1.47431160  | -0.11486816 |
| 254500_at   | AT4G20110 | 8.12E-04 | 2.57518820  | 0.00000024  | 2.49240160  | 0.23509932  |
| 254478_at   | AT4G20330 | 2.48E-03 | 0.28926420  | 0.00000000  | 0.25538063  | -0.02289867 |
| 254466_at   | AT4G20430 | 1.92E-03 | -0.77125310 | 0.00000000  | -0.50005627 | -0.04221201 |
| 254432_at   | AT4G20830 | 2.29E-03 | 2.18954370  | 0.00000000  | 1.85368200  | 0.37066364  |
| 254431_at   | AT4G20840 | 3.56E-04 | -0.34739614 | 0.00000024  | -0.83777523 | 0.25187254  |
| 254453_at   | AT4G21120 | 1.35E-03 | 1.29697850  | 0.00000000  | 1.02594180  | -0.00716591 |
| 254416_at   | AT4G21380 | 2.03E-03 | 1.70808740  | 0.00000000  | 1.41796080  | -0.22615695 |
| 254408_at   | AT4G21390 | 2.60E-04 | 2.14850020  | -0.00000024 | 1.26981590  | -0.19634128 |
| 254409_at   | AT4G21400 | 1.28E-05 | 1.78419970  | 0.00000000  | 1.22490720  | -0.38051224 |
| 254372_at   | AT4G21620 | 2.94E-03 | -0.49183273 | 0.00000000  | -0.37358665 | 0.07054186  |
| 254385_s_at | AT4G21830 | 1.90E-03 | 3.62133120  | -0.00000024 | 3.39079900  | 0.26578212  |
| 254387_at   | AT4G21850 | 6.84E-04 | 2.41660980  | 0.00000000  | 2.21263220  | -0.31723404 |
| 254388_at   | AT4G21860 | 1.20E-03 | -0.58226680 | 0.00000000  | -0.67489815 | 0.11170006  |
| 254335_at   | AT4G22260 | 1.88E-05 | 0.68242500  | 0.00000024  | 0.79297686  | 0.20884752  |
| 254318_at   | AT4G22530 | 5.01E-04 | 1.87373210  | 0.00000024  | 1.56936980  | 0.00826836  |
| 254276_at   | AT4G22820 | 3.89E-03 | 0.57067394  | 0.00000048  | 0.35166454  | -0.06641150 |
| 254289_at   | AT4G22980 | 2.06E-03 | 1.14295360  | 0.00000000  | 0.78097060  | -0.22888231 |
| 254292_at   | AT4G23030 | 6.28E-04 | 0.68419840  | 0.00000024  | 0.81089450  | -0.01718235 |
| 254266_at   | AT4G23130 | 2.13E-03 | 1.51540450  | 0.00000000  | 1.19827440  | -0.58338760 |
| 254265_s_at | AT4G23140 | 1.26E-03 | 2.95145560  | 0.00000024  | 3.00483230  | 0.11212039  |
| 254256_at   | AT4G23180 | 6.16E-05 | 0.66917086  | 0.00000000  | 0.44170475  | -0.39034700 |
| 254241_at   | AT4G23190 | 1.18E-04 | 1.34270260  | 0.00000024  | 1.48260640  | -0.03648329 |
| 254242_at   | AT4G23200 | 1.00E-03 | 1.14796640  | -0.00000048 | 0.99588394  | -0.44870758 |
| 254243_at   | AT4G23210 | 1.51E-03 | 2.40085740  | 0.00000024  | 2.54045060  | 0.31254816  |
| 254255_at   | AT4G23220 | 3.77E-04 | 2.67527250  | 0.00000000  | 2.37982560  | -0.33837366 |
| 254261_at   | AT4G23460 | 1.14E-05 | 0.80919313  | 0.00000000  | 0.76912355  | 0.02540302  |
| 254262_at   | AT4G23470 | 6.17E-04 | 1.69435790  | -0.00000048 | 1.50561100  | -0.11670589 |
| 254211_at   | AT4G23570 | 2.93E-03 | 1.60527990  | 0.00000000  | 1.53090050  | 0.11175203  |
| 254229_at   | AT4G23610 | 3.85E-04 | 2.30652710  | -0.00000024 | 2.36370470  | -0.13973522 |
| 254224_at   | AT4G23650 | 2.11E-03 | 0.79706000  | 0.00000000  | 0.72103500  | 0.27287054  |
| 254215_at   | AT4G23700 | 1.81E-03 | 2.52747770  | 0.00000024  | 2.45432100  | 0.30605220  |
| 254231_at   | AT4G23810 | 1.87E-03 | 3.05246260  | 0.00000000  | 2.81734000  | -0.09265304 |
| 254221_at   | AT4G23820 | 1.45E-03 | -0.90393114 | 0.00000000  | -0.95620060 | -0.20016909 |
| 254192_at   | AT4G23850 | 3.85E-03 | 0.95559500  | 0.00000000  | 0.94888450  | -0.11008692 |
| 254190_at   | AT4G23885 | 2.76E-03 | 2.02324870  | 0.00000000  | 1.88743230  | 0.15891695  |
| 254166_at   | AT4G24190 | 2.46E-03 | 1.56482030  | -0.00000048 | 1.71796660  | 0.25218630  |
| 254125_at   | AT4G24670 | 1.21E-03 | -0.67920756 | 0.00000024  | -0.72884180 | 0.04718399  |
| 254118_at   | AT4G24790 | 4.17E-03 | -0.59714840 | 0.00000000  | -0.45648813 | 0.09003854  |
| 254103_at   | AT4G25030 | 3.04E-04 | 0.64427090  | -0.00000048 | 0.71755600  | -0.08531046 |
| 254091_at   | AT4G25070 | 1.35E-03 | 0.39380240  | 0.00000024  | 0.53404000  | -0.08158875 |
| 254105_at   | AT4G25080 | 1.15E-04 | -0.79408836 | -0.00000048 | -0.79688690 | 0.08748198  |
| 254093_at   | AT4G25110 | 1.25E-03 | 1.56856780  | 0.00000024  | 1.67284870  | -0.26529694 |
| 254060_at   | AT4G25350 | 3.24E-04 | 0.33260750  | -0.00000024 | 0.21844530  | -0.02335930 |
| 254063_at   | AT4G25390 | 3.23E-03 | 1.06107520  | 0.00000000  | 0.70006250  | -0.20295572 |
| 254077_at   | AT4G25640 | 9.16E-04 | 0.75872755  | 0.00000000  | 0.93189670  | 0.16076660  |
| 254020_at   | AT4G25700 | 2.29E-03 | -0.65095377 | 0.00000000  | -0.96504590 | 0.08684921  |
| 254082_at   | AT4G25720 | 2.26E-03 | 0.78394890  | 0.00000000  | 0.55704020  | 0.02981520  |
| 254024_at   | AT4G25780 | 9.77E-05 | -2.05992940 | 0.00000024  | -2.25027280 | 0.28915262  |
| 254040_at   | AT4G25900 | 1.70E-03 | 1.47635840  | -0.00000048 | 1.55915260  | 0.25647163  |
| 254032_at   | AT4G25940 | 3.40E-03 | 0.22175932  | 0.00000000  | 0.00644207  | -0.49413824 |
| 253992_at   | AT4G26060 | 2.90E-04 | 1.44031910  | 0.00000000  | 1.20049290  | -0.11386299 |
| 253993_at   | AT4G26070 | 2.20E-03 | 1.04741000  | 0.00000048  | 0.89578676  | -0.20422268 |
| 254010_at   | AT4G26240 | 1.25E-03 | 0.56948230  | -0.00000048 | 0.65843487  | 0.04269600  |
| 253987_at   | AT4G26270 | 2.50E-03 | 1.21177530  | 0.00000000  | 1.42035250  | 0.04946137  |
| 253966_at   | AT4G26520 | 7.45E-04 | -0.94473934 | 0.00000000  | -1.13071610 | 0.11477876  |
| 253956_at   | AT4G26700 | 2.79E-03 | -0.62191060 | 0.00000000  | -0.79378510 | 0.03576756  |
| 253946_at   | AT4G26790 | 3.19E-03 | -0.56975390 | 0.00000000  | -0.52444840 | 0.01982021  |
| 253950_at   | AT4G26910 | 1.96E-03 | 1.39884420  | 0.00000000  | 1.40259270  | -0.03847885 |
| 253923_at   | AT4G27060 | 1.62E-04 | -0.13214016 | 0.00000048  | -0.21605492 | -0.01008415 |
| 253915_at   | AT4G27280 | 2.57E-04 | 1.94766330  | 0.00000000  | 1.89531760  | -0.28034496 |
| 253911_at   | AT4G27300 | 1.06E-03 | 0.89890146  | 0.00000000  | 0.65426207  | -0.31797980 |
| 253860_at   | AT4G27700 | 1.00E-03 | -0.78685570 | -0.00000048 | -0.59492590 | 0.30388880  |
| 253825_at   | AT4G28025 | 1.22E-03 | -0.64883040 | 0.00000000  | -0.95385265 | -0.07939053 |
| 253855_at   | AT4G28050 | 2.61E-03 | -0.64142130 | 0.00000000  | -0.60702230 | -0.10810566 |

|             |           |          |             |             |             |             |
|-------------|-----------|----------|-------------|-------------|-------------|-------------|
| 253811_at   | AT4G28190 | 2.31E-03 | -0.85242580 | -0.00000024 | -0.92865396 | -0.49690676 |
| 253776_at   | AT4G28390 | 1.93E-05 | 1.82649330  | -0.00000024 | 1.90373040  | -0.05500078 |
| 253779_at   | AT4G28490 | 1.06E-04 | 1.92584990  | 0.00000024  | 1.61422730  | 0.07930708  |
| 253789_at   | AT4G28570 | 8.04E-05 | 0.47034264  | 0.00000000  | 0.56358430  | -0.15315580 |
| 253755_at   | AT4G29040 | 3.68E-04 | 0.74250840  | -0.00000048 | 0.81540010  | 0.04756451  |
| 253747_at   | AT4G29050 | 3.32E-03 | 0.48066425  | 0.00000000  | 0.23344111  | -0.42199730 |
| 253735_at   | AT4G29160 | 2.45E-03 | 0.80494880  | -0.00000024 | 0.78379726  | 0.18973112  |
| 253708_at   | AT4G29210 | 1.09E-04 | 0.67375994  | -0.00000024 | 0.74941780  | 0.05904031  |
| 253712_at   | AT4G29330 | 8.10E-04 | 1.15393880  | 0.00000000  | 0.93385840  | 0.26548338  |
| 253696_at   | AT4G29740 | 3.90E-03 | 1.21643070  | 0.00000000  | 1.63553520  | 0.27766370  |
| 253643_at   | AT4G29780 | 1.73E-03 | 1.05714540  | 0.00000000  | 0.86764720  | -0.23950863 |
| 253646_at   | AT4G29810 | 3.45E-03 | 1.37484650  | 0.00000000  | 1.39120390  | 0.05927658  |
| 253702_at   | AT4G29900 | 2.20E-03 | 1.46164370  | 0.00000000  | 1.34209590  | -0.03349638 |
| 253642_at   | AT4G29960 | 1.30E-03 | 0.63209250  | 0.00000000  | 0.59146070  | 0.12225151  |
| 253624_at   | AT4G30580 | 3.73E-04 | -0.51261140 | -0.00000048 | -0.57436560 | 0.07642222  |
| 253579_at   | AT4G30610 | 2.97E-03 | -1.06720760 | -0.00000024 | -1.10996820 | 0.16750193  |
| 253547_at   | AT4G30950 | 1.00E-03 | -0.43463040 | 0.00000000  | -0.55564930 | -0.02361298 |
| 253546_at   | AT4G31040 | 4.14E-03 | -0.33605720 | 0.00000000  | -0.31268024 | 0.02161408  |
| 253518_at   | AT4G31400 | 2.36E-03 | -0.37214446 | 0.00000000  | -0.36711980 | -0.02686596 |
| 253534_at   | AT4G31500 | 2.70E-03 | 1.49770500  | 0.00000048  | 1.50542120  | 0.06438875  |
| 253530_at   | AT4G31530 | 1.17E-03 | -0.41667128 | 0.00000048  | -0.46953368 | 0.07378721  |
| 253537_at   | AT4G31560 | 1.03E-03 | -0.56963370 | 0.00000000  | -0.57384040 | -0.01652765 |
| 253533_at   | AT4G31590 | 4.67E-04 | -0.66165090 | -0.00000048 | -0.44768380 | -0.08137298 |
| 253485_at   | AT4G31800 | 4.03E-03 | 3.05651280  | 0.00000000  | 2.82885220  | 0.31779718  |
| 253429_at   | AT4G32420 | 1.99E-03 | -0.46830177 | 0.00000048  | -0.29399610 | -0.06145321 |
| 253440_at   | AT4G32570 | 1.19E-03 | -1.09748320 | 0.00000000  | -0.84951925 | 0.17843151  |
| 253389_at   | AT4G32680 | 1.00E-04 | 0.43203545  | 0.00000000  | 0.38816595  | 0.00443983  |
| 253401_at   | AT4G32870 | 2.48E-03 | 1.51869680  | 0.00000000  | 1.23392720  | -0.39853525 |
| 253406_at   | AT4G32890 | 3.50E-03 | -0.44940400 | 0.00000000  | -0.58996940 | 0.04512668  |
| 253411_at   | AT4G32980 | 3.46E-03 | -0.98319890 | -0.00000024 | -0.49525690 | 0.50015260  |
| 253387_at   | AT4G33010 | 9.58E-04 | -0.81374980 | 0.00000000  | -0.68952320 | 0.12670040  |
| 253414_at   | AT4G33050 | 1.43E-03 | 2.49607320  | 0.00000000  | 2.37949600  | -0.08074522 |
| 253361_at   | AT4G33100 | 1.19E-05 | 0.50406980  | 0.00000024  | 0.28365470  | -0.08772874 |
| 253334_at   | AT4G33360 | 3.92E-03 | 1.04482560  | -0.00000048 | 1.01447300  | -0.04858589 |
| 253337_at   | AT4G33470 | 1.50E-03 | -0.67015980 | 0.00000000  | -0.71438694 | 0.03196383  |
| 253343_at   | AT4G33540 | 1.58E-03 | 1.50531290  | 0.00000000  | 1.33840130  | 0.18035841  |
| 253302_at   | AT4G33660 | 2.36E-03 | -1.52001000 | 0.00000000  | -1.72918560 | -0.32102203 |
| 253307_at   | AT4G33670 | 9.24E-04 | -0.41298437 | -0.00000048 | -0.39895964 | 0.06675673  |
| 253303_at   | AT4G33780 | 4.15E-04 | 0.71861360  | 0.00000000  | 0.77207994  | 0.19493866  |
| 253283_at   | AT4G34090 | 2.39E-03 | -0.93628050 | 0.00000048  | -1.15609840 | -0.12674332 |
| 253282_at   | AT4G34120 | 2.96E-03 | 0.75305176  | 0.00000000  | 0.80504704  | 0.26290607  |
| 253284_at   | AT4G34150 | 1.52E-03 | 1.25245050  | 0.00000000  | 1.31633420  | -0.06950092 |
| 253285_at   | AT4G34250 | 1.43E-03 | -0.75885606 | 0.00000000  | -0.88483070 | 0.04904556  |
| 253257_at   | AT4G34390 | 1.09E-03 | 1.51113270  | 0.00000000  | 1.48077250  | 0.08443356  |
| 253173_at   | AT4G35110 | 1.58E-03 | 2.43097730  | 0.00000000  | 2.45077470  | 0.03197861  |
| 253181_at   | AT4G35180 | 6.83E-04 | 2.71767520  | 0.00000000  | 2.66721400  | 0.09118557  |
| 253188_at   | AT4G35300 | 2.59E-03 | -0.73047450 | -0.00000048 | -0.51158380 | 0.32348108  |
| 253195_at   | AT4G35420 | 1.10E-03 | -0.49541760 | 0.00000024  | -0.36557030 | -0.10810280 |
| 253147_at   | AT4G35600 | 1.74E-03 | 0.87736680  | 0.00000000  | 0.83210370  | -0.11983705 |
| 253118_at   | AT4G35950 | 1.72E-03 | -0.55556010 | 0.00000000  | -0.56525900 | 0.05405808  |
| 253075_at   | AT4G36150 | 1.41E-03 | 0.94693420  | -0.00000024 | 0.67162440  | -0.15755415 |
| 246162_at   | AT4G36400 | 2.05E-03 | 0.20999193  | 0.00000024  | 0.16348243  | -0.05035353 |
| 246195_at   | AT4G36410 | 1.05E-03 | -0.87168810 | 0.00000000  | -1.30127690 | -0.33042622 |
| 246219_at   | AT4G36760 | 1.26E-03 | 0.36060047  | 0.00000000  | 0.32572985  | -0.12601566 |
| 246214_at   | AT4G36988 | 1.56E-03 | 2.35888430  | 0.00000000  | 2.11177060  | 0.12904430  |
| 246194_at   | AT4G37000 | 2.24E-03 | -0.76121664 | 0.00000048  | -0.75233746 | 0.16876459  |
| 246231_at   | AT4G37080 | 3.12E-04 | -1.04078580 | -0.00000048 | -1.02892610 | 0.16462612  |
| 253044_at   | AT4G37290 | 3.36E-03 | 0.47903514  | 0.00000000  | 0.83462024  | -0.23296070 |
| 253099_s_at | AT4G37520 | 3.59E-04 | 2.29499770  | 0.00000024  | 1.96266800  | 0.40176558  |
| 253063_at   | AT4G37640 | 5.35E-04 | 1.79652550  | 0.00000000  | 1.60180330  | 0.08521128  |
| 253038_at   | AT4G37790 | 2.22E-04 | 0.46649313  | -0.00000024 | 0.38948680  | 0.02882218  |
| 252979_at   | AT4G38225 | 4.21E-03 | -0.65216160 | 0.00000000  | -0.70707417 | 0.00334740  |
| 252981_at   | AT4G38260 | 3.60E-03 | 1.22777560  | 0.00000000  | 1.19517370  | 0.19308686  |
| 252975_s_at | AT4G38430 | 1.42E-04 | -0.86285020 | -0.00000048 | -0.72603416 | -0.08746958 |
| 252977_at   | AT4G38560 | 6.95E-04 | 1.41061020  | 0.00000000  | 1.45455100  | -0.14777136 |
| 252971_at   | AT4G38770 | 1.28E-03 | -0.27136564 | -0.00000048 | -0.55751705 | -0.02006197 |
| 252921_at   | AT4G39030 | 6.87E-04 | 2.59823940  | -0.00000024 | 2.74315880  | 0.20928931  |
| 252945_at   | AT4G39140 | 1.58E-03 | 0.76778460  | -0.00000024 | 0.67171380  | 0.31540490  |
| 252879_at   | AT4G39390 | 1.42E-03 | 0.93310310  | 0.00000000  | 0.90203047  | 0.25146960  |
| 252906_at   | AT4G39640 | 1.49E-03 | 0.18847800  | 0.00000000  | 0.07649994  | -0.10899830 |
| 252908_at   | AT4G39670 | 4.27E-04 | 2.64576150  | 0.00000000  | 2.44568870  | 0.01112890  |
| 252861_at   | AT4G39820 | 1.23E-03 | 0.95721626  | 0.00000000  | 0.79033900  | 0.20227623  |
| 252862_at   | AT4G39830 | 1.24E-03 | 2.01021960  | 0.00000000  | 2.10938430  | 0.01834202  |
| 252825_at   | AT4G39890 | 3.02E-03 | 1.20655560  | 0.00000024  | 1.12512610  | -0.07104135 |
| 252876_at   | AT4G39970 | 2.73E-03 | -0.91283990 | 0.00000000  | -1.07883690 | -0.10625982 |
| 251142_at   | AT5G01015 | 1.02E-03 | -1.82012560 | -0.00000048 | -1.96494630 | -0.27070856 |
| 251089_at   | AT5G01390 | 1.78E-03 | -0.54920960 | -0.00000048 | -0.43128730 | -0.37689400 |
| 251054_at   | AT5G01540 | 2.58E-04 | 1.86956120  | 0.00000000  | 1.65321060  | -0.22910666 |
| 251061_at   | AT5G01830 | 3.34E-03 | 0.63082194  | 0.00000024  | 0.27551556  | -0.01608515 |
| 251063_at   | AT5G01850 | 1.11E-03 | 1.72911740  | 0.00000024  | 1.68508390  | 0.38428260  |
| 251068_at   | AT5G01920 | 2.91E-04 | -1.11918070 | 0.00000048  | -1.17381100 | -0.14094973 |
| 251033_at   | AT5G01960 | 1.96E-03 | 0.35904170  | 0.00000000  | 0.30630684  | -0.06462812 |
| 251077_at   | AT5G01980 | 2.84E-03 | 0.59834910  | 0.00000000  | 0.64189625  | -0.06113911 |
| 251037_at   | AT5G02100 | 5.56E-06 | 1.14643430  | 0.00000000  | 0.80730580  | 0.00994825  |
| 251040_at   | AT5G02250 | 3.21E-04 | -0.54387045 | -0.00000048 | -0.44903898 | 0.04635191  |
| 250990_at   | AT5G02290 | 2.10E-03 | 0.94710160  | 0.00000000  | 0.92808104  | -0.12312651 |
| 251046_at   | AT5G02370 | 1.98E-03 | -0.66590047 | 0.00000024  | -0.49931502 | -0.23664379 |
| 250994_at   | AT5G02490 | 1.12E-03 | 2.52060600  | 0.00000000  | 2.45360900  | 0.13877177  |
| 251013_at   | AT5G02540 | 2.84E-03 | -0.33089685 | 0.00000024  | -0.85929300 | -0.17079353 |

|           |           |          |             |             |             |             |
|-----------|-----------|----------|-------------|-------------|-------------|-------------|
| 250998_at | AT5G02620 | 3.84E-04 | 0.44325447  | 0.00000000  | 0.33068037  | -0.14995337 |
| 250999_at | AT5G02630 | 1.18E-04 | 0.49561740  | 0.00000000  | 0.41372870  | 0.02050400  |
| 251008_at | AT5G02710 | 3.18E-03 | -0.85278320 | 0.00000000  | -0.62108400 | 0.33253384  |
| 250934_at | AT5G03030 | 2.68E-04 | 0.26542377  | 0.00000000  | 0.17657518  | -0.13752985 |
| 250930_at | AT5G03160 | 4.75E-04 | 1.52674910  | -0.00000024 | 1.37842370  | 0.13813806  |
| 250899_at | AT5G03340 | 9.92E-04 | 0.98903656  | -0.00000024 | 0.76294756  | 0.17972660  |
| 250918_at | AT5G03610 | 2.61E-03 | 1.02045010  | 0.00000000  | 0.84862230  | 0.22891665  |
| 250916_at | AT5G03630 | 3.25E-04 | 1.25091310  | 0.00000048  | 0.99639416  | 0.23910856  |
| 250879_at | AT5G04060 | 3.88E-03 | -0.58176947 | -0.00000024 | -0.49285698 | -0.10633612 |
| 245693_at | AT5G04260 | 4.19E-03 | 0.33243418  | 0.00000000  | 0.31486510  | 0.02832937  |
| 250849_at | AT5G04410 | 4.10E-03 | 0.27006817  | 0.00000048  | 0.22947788  | -0.14267730 |
| 250829_at | AT5G04720 | 1.40E-03 | 1.85896020  | 0.00000000  | 1.85512210  | 0.09121180  |
| 250863_at | AT5G04750 | 3.07E-03 | 0.55163100  | 0.00000048  | 0.58776000  | 0.00627804  |
| 250856_at | AT5G04810 | 8.66E-04 | -0.87205220 | -0.00000048 | -0.88804054 | -0.10775137 |
| 250812_at | AT5G04900 | 1.57E-04 | -0.47480774 | 0.00000000  | -0.60536550 | 0.23063564  |
| 250831_at | AT5G04920 | 2.35E-03 | 0.53639410  | 0.00000000  | 0.49866152  | -0.18611431 |
| 250818_at | AT5G04930 | 5.20E-04 | 1.30120610  | 0.00000048  | 1.28986020  | -0.30514812 |
| 250821_at | AT5G05190 | 2.51E-03 | 0.46081114  | 0.00000024  | 0.40947342  | -0.28367066 |
| 250796_at | AT5G05300 | 3.47E-05 | 1.92425780  | 0.00000000  | 1.60771370  | -0.04908681 |
| 250775_at | AT5G05460 | 1.66E-05 | 1.00819060  | 0.00000024  | 1.00363060  | -0.41810608 |
| 250738_at | AT5G05730 | 7.48E-04 | 1.98452000  | 0.00000000  | 1.61634020  | 0.02546120  |
| 250763_at | AT5G06060 | 1.40E-03 | -0.42688322 | 0.00000048  | -0.48735762 | 0.09592438  |
| 250694_at | AT5G06710 | 2.06E-04 | -0.67709970 | 0.00000024  | -0.35250760 | -0.02687550 |
| 250697_at | AT5G06800 | 3.50E-03 | -0.25913525 | 0.00000024  | -0.22873473 | -0.00957584 |
| 250655_at | AT5G06960 | 2.93E-03 | 0.76801180  | 0.00000024  | 0.68463254  | 0.10966396  |
| 250668_at | AT5G07020 | 2.52E-03 | -0.42524672 | -0.00000048 | -0.51358270 | 0.17193270  |
| 250640_at | AT5G07150 | 3.87E-03 | 0.50600910  | 0.00000024  | 0.74697850  | -0.16214705 |
| 250626_at | AT5G07350 | 4.27E-03 | 0.86210300  | -0.00000048 | 0.69627476  | -0.01416779 |
| 250627_at | AT5G07360 | 1.51E-03 | 0.77264833  | -0.00000024 | 0.66991997  | -0.19986248 |
| 250577_at | AT5G07910 | 1.94E-03 | 0.55702260  | 0.00000000  | 0.67706300  | 0.14621449  |
| 250569_at | AT5G08130 | 3.06E-03 | -0.47678542 | 0.00000048  | -0.59266305 | 0.03769016  |
| 250575_at | AT5G08240 | 1.41E-03 | 1.45303010  | -0.00000024 | 1.52204360  | -0.06208706 |
| 246053_at | AT5G08340 | 3.39E-04 | -0.56779766 | 0.00000000  | -0.46476007 | -0.32164645 |
| 246036_at | AT5G08370 | 5.10E-04 | -0.93172290 | 0.00000000  | -0.67758870 | 0.10189295  |
| 250528_at | AT5G08600 | 2.79E-03 | -0.25027156 | -0.00000024 | -0.20396209 | 0.12001324  |
| 250531_at | AT5G08650 | 3.14E-04 | -0.55708410 | 0.00000000  | -0.91382027 | 0.06493521  |
| 245932_at | AT5G09290 | 1.22E-03 | 0.85391260  | 0.00000000  | 1.24805570  | -0.51147390 |
| 245881_at | AT5G09460 | 1.59E-03 | -0.51847816 | -0.00000024 | -0.18096328 | 0.23176980  |
| 250516_at | AT5G09620 | 1.78E-04 | 0.44268894  | 0.00000048  | 0.33878660  | 0.00529480  |
| 250478_at | AT5G10250 | 2.91E-03 | -0.66151550 | 0.00000000  | -0.69932747 | -0.02228975 |
| 250435_at | AT5G10380 | 2.81E-03 | 2.00994730  | 0.00000048  | 2.35454030  | -0.00869227 |
| 250429_at | AT5G10470 | 2.26E-03 | -0.60174800 | -0.00000048 | -0.72569130 | 0.11011410  |
| 246018_at | AT5G10695 | 8.12E-05 | 1.94063850  | 0.00000000  | 1.67715360  | -0.34542322 |
| 250400_at | AT5G10740 | 2.44E-04 | 1.15322780  | -0.00000024 | 0.85410595  | -0.29407310 |
| 245806_at | AT5G11070 | 1.40E-03 | -0.85684013 | 0.00000000  | -0.73868610 | 0.26968430  |
| 250415_at | AT5G11210 | 1.95E-03 | 0.70061730  | 0.00000024  | 0.78999330  | -0.16070032 |
| 250362_at | AT5G11380 | 2.67E-03 | -0.34501170 | 0.00000048  | -0.32422042 | 0.02987289  |
| 250339_at | AT5G11670 | 3.57E-03 | 1.15794090  | 0.00000048  | 1.03705120  | -0.02162838 |
| 250334_at | AT5G11770 | 1.83E-03 | 0.27359295  | 0.00000000  | 0.42898893  | 0.05063868  |
| 250302_at | AT5G11920 | 1.47E-04 | 2.46568580  | 0.00000000  | 2.30549380  | -0.03393436 |
| 250301_at | AT5G11970 | 1.69E-03 | 1.35794730  | 0.00000000  | 1.04795460  | -0.13321209 |
| 250305_at | AT5G12150 | 6.90E-04 | -0.65082600 | 0.00000000  | -0.75650930 | -0.07200527 |
| 245183_at | AT5G12440 | 4.20E-03 | -0.56444764 | 0.00000048  | -0.43342042 | 0.10683012  |
| 250264_at | AT5G12890 | 2.17E-04 | 0.70797825  | 0.00000024  | 0.71374510  | -0.11715221 |
| 250267_at | AT5G12930 | 8.36E-04 | 1.24813320  | 0.00000000  | 1.04517150  | 0.02754235  |
| 250277_at | AT5G12940 | 7.12E-04 | 0.36225033  | 0.00000024  | 0.54938200  | -0.04028750 |
| 250272_at | AT5G13000 | 2.04E-03 | -0.51525400 | 0.00000048  | -0.40825224 | -0.03392220 |
| 250276_at | AT5G13030 | 3.69E-03 | 0.60012150  | -0.00000048 | 0.62198925  | 0.11100960  |
| 245976_at | AT5G13080 | 1.30E-03 | 1.87871000  | -0.00000024 | 1.31728890  | -0.13232470 |
| 250289_at | AT5G13190 | 2.94E-04 | 1.58472350  | 0.00000000  | 1.44510700  | -0.14818573 |
| 250279_at | AT5G13200 | 1.50E-03 | 1.38794900  | 0.00000000  | 1.37071080  | -0.04655981 |
| 250286_at | AT5G13320 | 8.76E-04 | 3.19903760  | 0.00000000  | 3.26682900  | 0.44817257  |
| 250261_at | AT5G13400 | 7.26E-04 | -1.17285250 | -0.00000048 | -1.23963790 | -0.12992048 |
| 250262_at | AT5G13410 | 2.82E-03 | -0.57021904 | 0.00000000  | -0.77806090 | -0.27947140 |
| 245855_at | AT5G13550 | 3.98E-03 | 0.83332160  | 0.00000000  | 0.53244925  | 0.13655877  |
| 250255_at | AT5G13730 | 2.29E-03 | -1.21543810 | 0.00000000  | -1.46613000 | -0.06250668 |
| 250151_at | AT5G14570 | 3.25E-03 | -0.54733560 | 0.00000000  | -0.75561760 | -0.09379816 |
| 250146_at | AT5G14660 | 4.08E-03 | -0.70839360 | 0.00000000  | -0.63669680 | 0.35182762  |
| 246547_at | AT5G14970 | 8.01E-04 | -0.55260515 | 0.00000000  | -0.80367520 | -0.00126457 |
| 250160_at | AT5G15210 | 1.50E-03 | -0.32128860 | 0.00000000  | -0.30474950 | 0.10952568  |
| 246565_at | AT5G15530 | 6.71E-04 | -0.65542510 | 0.00000024  | -0.58040690 | 0.05263948  |
| 246532_at | AT5G15870 | 1.11E-03 | 1.75245570  | 0.00000000  | 1.76964240  | 0.30223536  |
| 246483_at | AT5G16000 | 5.17E-05 | -0.88623860 | 0.00000048  | -0.78116800 | -0.08035421 |
| 246488_at | AT5G16010 | 3.31E-04 | -0.38154364 | 0.00000000  | -0.22656060 | 0.00607586  |
| 246485_at | AT5G16080 | 6.58E-04 | 1.08543780  | 0.00000000  | 1.21362400  | 0.08633304  |
| 246498_at | AT5G16230 | 6.55E-04 | 2.39981910  | 0.00000024  | 2.08612970  | 0.25737810  |
| 250125_at | AT5G16390 | 1.55E-03 | -0.48183870 | -0.00000048 | -0.48060130 | 0.13409472  |
| 250129_at | AT5G16450 | 3.51E-03 | 0.42717028  | 0.00000000  | 0.43214464  | 0.14402819  |
| 250102_at | AT5G16590 | 6.89E-04 | -0.70113660 | 0.00000048  | -0.76624180 | -0.03911686 |
| 250105_at | AT5G16630 | 4.37E-04 | -0.42749882 | -0.00000024 | -0.38740325 | -0.23954177 |
| 246422_at | AT5G17060 | 3.93E-03 | 1.22103400  | -0.00000024 | 1.15854020  | 0.27871084  |
| 250094_at | AT5G17380 | 7.25E-04 | 1.14452220  | -0.00000048 | 0.94602110  | 0.06086636  |
| 246427_at | AT5G17400 | 1.83E-03 | -0.87824535 | 0.00000000  | -0.75330760 | -0.20784068 |
| 246434_at | AT5G17520 | 1.90E-03 | -0.76191900 | 0.00000048  | -0.73213960 | 0.04506111  |
| 250056_at | AT5G17660 | 2.07E-03 | -0.67338085 | 0.00000024  | -0.38507295 | -0.07605934 |
| 250075_at | AT5G17670 | 5.11E-04 | -0.70886850 | 0.00000048  | -0.95592546 | 0.01661778  |
| 250062_at | AT5G17760 | 1.33E-03 | 2.89295430  | 0.00000024  | 3.75268030  | 0.83878230  |
| 250054_at | AT5G17860 | 2.85E-03 | 1.81423900  | 0.00000000  | 1.10202500  | 0.02916336  |
| 250014_at | AT5G17990 | 1.48E-03 | 1.64698980  | 0.00000048  | 1.65030480  | 0.40348625  |

|             |             |          |             |             |             |             |
|-------------|-------------|----------|-------------|-------------|-------------|-------------|
| 250016_at   | AT5G18100   | 1.59E-03 | -0.47415495 | 0.00000048  | -0.49679660 | -0.01242638 |
| 249988_at   | AT5G18310   | 4.70E-04 | 1.03276920  | -0.00000048 | 0.98386860  | -0.00309753 |
| 250041_at   | AT5G18410   | 3.41E-03 | -0.64845324 | 0.00000000  | -0.77361390 | -0.23576832 |
| 249983_at   | AT5G18470   | 9.00E-04 | 3.51239440  | -0.00000024 | 3.34050270  | 0.23110962  |
| 249974_at   | AT5G18780   | 1.07E-03 | 0.81285095  | 0.00000000  | 0.86241674  | -0.23647094 |
| 249978_at   | AT5G18850   | 3.15E-03 | -0.69997810 | 0.00000048  | -0.48336887 | 0.03023624  |
| 249957_at   | AT5G18900   | 3.46E-03 | 0.69940186  | 0.00000000  | 0.78410390  | 0.12708235  |
| 249918_at   | AT5G19240   | 1.86E-03 | 2.55816750  | 0.00000000  | 2.20767880  | -0.21896935 |
| 245911_at   | AT5G19690   | 3.36E-03 | 0.95113420  | 0.00000000  | 1.14650680  | 0.32756805  |
| 246150_at   | AT5G19930   | 4.46E-04 | 0.87594890  | 0.00000000  | 0.84002350  | -0.08703852 |
| 246143_at   | AT5G19980   | 4.05E-03 | 1.16945740  | 0.00000000  | 1.25101380  | 0.05706501  |
| 246147_s_at | AT5G19990 / | 2.34E-03 | 0.56475020  | 0.00000000  | 0.58068514  | 0.12074709  |
| 246110_at   | AT5G20140   | 2.13E-03 | -0.45706272 | -0.00000024 | -0.43506694 | 0.05096769  |
| 246099_at   | AT5G20230   | 1.63E-03 | 2.41540000  | 0.00000000  | 2.22260240  | -0.16652775 |
| 246122_at   | AT5G20380   | 6.54E-04 | -0.61427736 | 0.00000048  | -0.61045790 | -0.03088617 |
| 246098_at   | AT5G20400   | 3.05E-04 | 1.82328600  | 0.00000000  | 1.49752160  | 0.21825123  |
| 246135_at   | AT5G20885   | 1.09E-03 | -0.43878317 | 0.00000048  | -0.23836803 | 0.12895155  |
| 245686_at   | AT5G22060   | 2.04E-03 | 1.53042170  | 0.00000000  | 1.52145530  | 0.17192698  |
| 249928_at   | AT5G22250   | 3.81E-03 | 1.50076440  | -0.00000024 | 1.17520880  | -0.11265039 |
| 249940_at   | AT5G22380   | 1.90E-03 | 1.37609530  | 0.00000000  | 1.07552170  | -0.13020515 |
| 249896_at   | AT5G22530   | 4.48E-04 | 2.80511100  | 0.00000000  | 2.37407970  | -0.05068708 |
| 249890_at   | AT5G22570   | 2.08E-03 | 4.04358400  | -0.00000024 | 3.62639710  | 0.44280982  |
| 249899_at   | AT5G22620   | 3.81E-04 | -0.67810726 | 0.00000048  | -0.67615320 | 0.00411034  |
| 249910_at   | AT5G22630   | 2.49E-04 | 1.25338790  | 0.00000024  | 1.04825020  | 0.14234757  |
| 249909_s_at | AT5G22770 / | 4.54E-04 | 0.77461240  | 0.00000000  | 0.66808130  | 0.16995096  |
| 249866_at   | AT5G23010   | 1.37E-03 | -1.45718770 | 0.00000048  | -0.65980150 | 0.02320814  |
| 249876_at   | AT5G23060   | 4.28E-04 | -0.98252060 | -0.00000048 | -1.06506590 | 0.19885015  |
| 249847_at   | AT5G23210   | 2.15E-03 | -0.98374080 | 0.00000000  | -1.23604750 | -0.27462770 |
| 249796_at   | AT5G23540   | 1.14E-03 | 0.73052600  | -0.00000048 | 0.84466124  | 0.19318676  |
| 249806_at   | AT5G23850   | 4.33E-04 | 1.36307240  | 0.00000000  | 1.36812830  | 0.14439678  |
| 249810_at   | AT5G23920   | 3.32E-03 | -0.85405730 | -0.00000048 | -0.78199196 | -0.08903647 |
| 249770_at   | AT5G24110   | 4.83E-04 | 2.81863880  | -0.00000024 | 2.46967890  | -0.22015023 |
| 249777_at   | AT5G24210   | 4.74E-04 | 2.83095740  | 0.00000000  | 2.81479880  | 0.02163124  |
| 249785_at   | AT5G24300   | 6.69E-05 | -0.77817106 | -0.00000048 | -0.53242400 | 0.24348688  |
| 249732_at   | AT5G24420   | 2.41E-03 | -1.71278550 | -0.00000048 | -1.29769780 | 0.30347633  |
| 249754_at   | AT5G24530   | 4.55E-04 | 2.51503800  | 0.00000000  | 2.57594730  | -0.00454712 |
| 249743_at   | AT5G24540   | 3.21E-04 | 1.40799400  | 0.00000000  | 1.09109970  | -0.10817289 |
| 249755_at   | AT5G24580   | 2.12E-03 | -0.45029163 | 0.00000000  | -0.26249194 | 0.01456523  |
| 246976_s_at | AT5G24810   | 7.56E-04 | 1.19198560  | 0.00000048  | 1.10768800  | 0.14695597  |
| 246927_s_at | AT5G25250 / | 1.51E-03 | 3.81783300  | -0.00000024 | 3.52580880  | 0.48142480  |
| 246895_at   | AT5G25540   | 1.30E-03 | 0.82848790  | 0.00000048  | 0.70297720  | 0.07186365  |
| 246858_at   | AT5G25930   | 5.10E-04 | 2.25264170  | 0.00000024  | 1.74337150  | -0.18734646 |
| 246870_at   | AT5G26030   | 3.12E-03 | 1.52231070  | 0.00000048  | 1.50376940  | 0.25896215  |
| 246847_at   | AT5G26820   | 3.99E-03 | -0.79254150 | 0.00000000  | -1.05189940 | -0.04625750 |
| 246849_at   | AT5G26850   | 6.75E-04 | -0.33785105 | 0.00000048  | -0.14132404 | 0.15587200  |
| 246821_at   | AT5G26920   | 2.48E-03 | 2.64328770  | 0.00000000  | 3.06657310  | 0.44795465  |
| 246792_at   | AT5G27290   | 2.49E-04 | -1.06865930 | 0.00000048  | -1.08666610 | 0.05175448  |
| 246777_at   | AT5G27420   | 1.22E-03 | 2.24474900  | 0.00000000  | 2.34462070  | -0.06039286 |
| 246779_at   | AT5G27520   | 1.91E-03 | 0.87236166  | 0.00000000  | 0.71495580  | 0.03865504  |
| 246736_at   | AT5G27560   | 8.63E-05 | -0.79221725 | -0.00000048 | -0.74386406 | 0.13567162  |
| 246789_at   | AT5G27600   | 3.82E-04 | 1.10237690  | -0.00000024 | 0.95450974  | -0.31091976 |
| 246749_at   | AT5G27830   | 8.59E-04 | 1.33529950  | 0.00000024  | 1.33968260  | 0.23551488  |
| 246682_at   | AT5G33290   | 1.33E-03 | 1.04557700  | 0.00000048  | 0.90775300  | -0.03470135 |
| 255859_at   | AT5G34930   | 2.95E-03 | 0.46070457  | 0.00000000  | 0.36903167  | -0.15205574 |
| 246653_at   | AT5G35200   | 3.42E-03 | 0.67558575  | 0.00000000  | 0.77904654  | -0.01960087 |
| 246654_s_at | AT5G35210 / | 1.12E-03 | -0.27771378 | 0.00000000  | -0.20556402 | 0.38927984  |
| 249691_at   | AT5G36170   | 1.50E-04 | -0.70092820 | 0.00000000  | -0.87830590 | -0.09051943 |
| 246620_at   | AT5G36220   | 2.02E-03 | 2.25728560  | 0.00000000  | 1.67497440  | -0.13083196 |
| 246621_at   | AT5G36230   | 2.09E-03 | -0.14943647 | 0.00000000  | -0.02134943 | 0.04821587  |
| 249638_at   | AT5G36880   | 3.74E-03 | 1.01475860  | -0.00000048 | 0.97401047  | 0.17222070  |
| 249639_at   | AT5G36930   | 3.93E-03 | 0.79286600  | 0.00000000  | 0.94617033  | -0.23807550 |
| 249652_at   | AT5G37070   | 1.32E-03 | 1.14914560  | 0.00000000  | 1.01340630  | 0.07717037  |
| 249610_at   | AT5G37360   | 9.23E-04 | -0.44921780 | -0.00000048 | -0.66879654 | -0.04939365 |
| 249625_at   | AT5G37480   | 6.75E-04 | 0.81114817  | 0.00000000  | 0.67409610  | -0.16296577 |
| 249618_at   | AT5G37490   | 3.33E-04 | 0.15203261  | 0.00000024  | 0.31566024  | -0.13634300 |
| 249581_at   | AT5G37600   | 1.69E-03 | 1.80195380  | 0.00000000  | 2.02633240  | 0.56672764  |
| 249579_at   | AT5G37680   | 3.30E-03 | -0.80825780 | 0.00000000  | -0.71636033 | -0.18670702 |
| 249582_at   | AT5G37780   | 2.34E-03 | 0.67071724  | 0.00000048  | 0.74977160  | 0.18488741  |
| 249554_at   | AT5G38290   | 2.72E-03 | -0.80229354 | 0.00000000  | -0.80248594 | 0.16180325  |
| 249510_at   | AT5G38510   | 2.21E-03 | -0.95992090 | 0.00000000  | -1.07780120 | -0.07825327 |
| 249524_at   | AT5G38520   | 1.02E-03 | -0.97117376 | 0.00000000  | -1.04845810 | 0.15692711  |
| 249523_at   | AT5G38630   | 3.82E-03 | 0.65014980  | 0.00000048  | 0.60936450  | 0.03883553  |
| 249525_at   | AT5G38650   | 6.30E-04 | 0.68483590  | 0.00000000  | 0.56375840  | -0.03630018 |
| 249527_at   | AT5G38710   | 2.21E-04 | 2.39893840  | 0.00000024  | 1.75863030  | -0.09690380 |
| 249537_at   | AT5G38830   | 3.97E-03 | 0.53903960  | 0.00000000  | 0.53611183  | 0.24229717  |
| 249481_at   | AT5G38900   | 1.77E-03 | 2.94982670  | 0.00000000  | 2.73633770  | 0.00597048  |
| 249480_s_at | AT5G38990 / | 1.08E-03 | 0.70427560  | 0.00000000  | 0.44603777  | -0.12449169 |
| 249485_at   | AT5G39020   | 6.51E-04 | 0.90113354  | 0.00000000  | 0.66926813  | -0.25363730 |
| 249486_at   | AT5G39030   | 3.09E-03 | 0.40550566  | 0.00000000  | 0.47131157  | -0.21359539 |
| 249487_at   | AT5G39040   | 5.86E-04 | 0.74737170  | -0.00000024 | 0.72206783  | -0.00276279 |
| 249489_at   | AT5G39090   | 3.16E-03 | 0.80696680  | 0.00000000  | 0.72077775  | -0.29707742 |
| 249453_at   | AT5G39510   | 2.55E-03 | 0.54714730  | 0.00000000  | 0.57217360  | 0.02505159  |
| 249417_at   | AT5G39670   | 7.67E-04 | 3.06385800  | 0.00000000  | 3.17365220  | 0.27089143  |
| 249423_at   | AT5G39785   | 2.25E-03 | 1.06567360  | 0.00000000  | 0.95072390  | 0.10476971  |
| 249385_at   | AT5G39950   | 1.95E-03 | 1.05641510  | 0.00000000  | 1.06784870  | 0.00741196  |
| 249393_at   | AT5G40170   | 4.29E-04 | 1.06802610  | 0.00000000  | 0.87855480  | 0.16981030  |
| 249397_at   | AT5G40230   | 2.13E-03 | 0.35537648  | 0.00000024  | 0.92333674  | 0.17823195  |
| 249410_at   | AT5G40380   | 3.18E-05 | -0.82553580 | 0.00000000  | -1.18512730 | -0.35618448 |
| 249374_at   | AT5G40580   | 2.34E-04 | 0.68661020  | 0.00000048  | 0.63816020  | 0.07168245  |



|             |           |          |             |             |             |             |
|-------------|-----------|----------|-------------|-------------|-------------|-------------|
| 249343_at   | AT5G40650 | 3.39E-03 | 0.52264404  | 0.00000000  | 0.45824242  | 0.06527472  |
| 249372_at   | AT5G40760 | 3.14E-03 | 1.62569670  | -0.00000024 | 1.57658910  | 0.39025617  |
| 249346_at   | AT5G40780 | 7.02E-04 | 2.12858770  | 0.00000000  | 1.99451920  | 0.07772255  |
| 249288_at   | AT5G41050 | 3.27E-03 | -1.15468290 | -0.00000048 | -1.27450700 | 0.09784699  |
| 249290_at   | AT5G41060 | 1.53E-03 | -0.48640227 | -0.00000024 | -0.30634308 | 0.11541915  |
| 249314_at   | AT5G41180 | 1.24E-03 | 1.09574440  | 0.00000024  | 1.06510260  | 0.16920924  |
| 249255_at   | AT5G41610 | 4.41E-04 | 0.52421500  | 0.00000000  | 0.67755985  | 0.12694645  |
| 249279_at   | AT5G41920 | 3.14E-03 | -0.23335266 | 0.00000000  | -0.23350906 | 0.08686638  |
| 249252_at   | AT5G42010 | 3.36E-03 | 0.59077310  | 0.00000000  | 0.74613190  | 0.06605625  |
| 249237_at   | AT5G42050 | 7.01E-04 | 1.62328480  | 0.00000000  | 1.74294570  | 0.09295893  |
| 249230_at   | AT5G42070 | 6.01E-04 | -1.28585620 | 0.00000000  | -1.20780320 | -0.16590881 |
| 249234_at   | AT5G42200 | 1.13E-04 | -1.06467890 | 0.00000000  | -1.28767800 | -0.19517231 |
| 249197_at   | AT5G42380 | 8.25E-04 | 1.75537750  | 0.00000012  | 1.94641450  | -0.04053497 |
| 249212_at   | AT5G42690 | 1.06E-03 | -0.23656869 | 0.00000000  | -0.20494652 | -0.10555673 |
| 249161_at   | AT5G42790 | 3.57E-03 | 1.00522140  | 0.00000048  | 0.99900720  | 0.29523468  |
| 249188_at   | AT5G42830 | 2.88E-04 | 1.20908690  | 0.00000000  | 1.16124150  | -0.38926172 |
| 249177_at   | AT5G42850 | 3.51E-03 | 0.42152310  | 0.00000048  | 0.35097600  | 0.12297440  |
| 249130_at   | AT5G43100 | 6.10E-05 | 0.49140453  | 0.00000000  | 0.53665830  | -0.16070557 |
| 249120_at   | AT5G43750 | 3.90E-04 | -0.96342325 | 0.00000000  | -1.04447790 | -0.04262638 |
| 249096_at   | AT5G43910 | 2.62E-04 | 2.02160500  | 0.00000024  | 2.05910920  | 0.03368759  |
| 249077_at   | AT5G43940 | 1.73E-03 | 0.46666288  | -0.00000048 | 0.68250800  | 0.06616545  |
| 249075_at   | AT5G44000 | 1.47E-03 | -0.48044920 | 0.00000000  | -0.40325785 | -0.11374426 |
| 249069_at   | AT5G44010 | 3.15E-03 | -0.58828900 | -0.00000024 | -0.52199270 | 0.29118800  |
| 249078_at   | AT5G44070 | 3.13E-04 | 1.06197790  | 0.00000048  | 1.00097610  | -0.12541294 |
| 249083_at   | AT5G44140 | 5.53E-04 | -0.40034652 | 0.00000000  | -0.18183088 | -0.07852650 |
| 249089_at   | AT5G44240 | 5.56E-04 | 0.82764006  | -0.00000048 | 0.49162388  | -0.29448557 |
| 249052_at   | AT5G44420 | 2.01E-03 | 3.36235760  | -0.00000024 | 3.04722740  | -0.97673010 |
| 249002_at   | AT5G44520 | 4.25E-04 | -0.58746720 | 0.00000000  | -0.72692490 | 0.03712559  |
| 249004_at   | AT5G44570 | 3.90E-03 | 1.69240710  | 0.00000000  | 1.62374830  | 0.13295865  |
| 254521_at   | AT5G44820 | 2.74E-03 | 2.14009000  | 0.00000000  | 1.61222150  | -0.17581868 |
| 249021_at   | AT5G44820 | 2.43E-03 | 1.30580380  | 0.00000000  | 1.30390020  | -0.03176332 |
| 249001_at   | AT5G44990 | 3.55E-03 | 0.91534950  | 0.00000000  | 0.46442270  | -0.37729645 |
| 248971_at   | AT5G45000 | 1.93E-05 | 1.72479250  | 0.00000024  | 1.51700640  | -0.21213889 |
| 248975_at   | AT5G45040 | 9.36E-04 | -1.21143030 | -0.00000048 | -1.28333350 | -0.03300095 |
| 248981_at   | AT5G45110 | 1.78E-03 | 1.31309220  | 0.00000000  | 1.29094840  | -0.12600231 |
| 248983_at   | AT5G45130 | 3.78E-03 | 1.02410030  | 0.00000048  | 1.01673510  | 0.21551037  |
| 248997_at   | AT5G45300 | 1.02E-03 | -0.66915700 | 0.00000000  | -0.47434520 | -0.08694601 |
| 248967_at   | AT5G45350 | 4.01E-03 | -0.16859531 | 0.00000048  | -0.10989904 | -0.03378248 |
| 248941_s_at | AT5G45460 | 2.74E-03 | 1.57435890  | 0.00000024  | 1.70039960  | 0.49922514  |
| 248942_at   | AT5G45480 | 8.84E-04 | 0.91797540  | -0.00000048 | 0.92115736  | 0.07356072  |
| 248944_at   | AT5G45500 | 3.21E-03 | 1.13540700  | -0.00000048 | 1.02677200  | -0.19026184 |
| 248951_at   | AT5G45550 | 2.91E-03 | 0.70186330  | 0.00000048  | 0.57254460  | -0.00511932 |
| 248962_at   | AT5G45680 | 5.49E-04 | -0.96726704 | 0.00000048  | -1.15060900 | -0.12363434 |
| 248932_at   | AT5G46050 | 2.34E-03 | 1.72836540  | 0.00000000  | 1.63062620  | 0.18226194  |
| 248934_at   | AT5G46080 | 5.60E-04 | 1.19155120  | 0.00000024  | 1.08940670  | -0.20069313 |
| 248905_at   | AT5G46250 | 2.71E-04 | 0.63456820  | 0.00000048  | 0.56691120  | -0.04221010 |
| 248896_at   | AT5G46350 | 3.03E-03 | 0.66998600  | 0.00000000  | 0.79707265  | -0.17853689 |
| 248899_at   | AT5G46390 | 2.19E-03 | -0.53267956 | 0.00000048  | -0.47609830 | -0.10182619 |
| 248906_at   | AT5G46420 | 6.66E-04 | -0.65092470 | 0.00000000  | -0.74183080 | 0.03682470  |
| 248821_at   | AT5G47070 | 3.31E-03 | 1.24300430  | 0.00000024  | 1.32285360  | 0.08038497  |
| 248833_at   | AT5G47120 | 1.27E-03 | 1.50151200  | 0.00000000  | 1.60487600  | 0.30202007  |
| 248792_at   | AT5G47200 | 9.71E-04 | 0.83225346  | -0.00000048 | 0.92173815  | 0.26935863  |
| 248794_at   | AT5G47220 | 7.00E-04 | 2.79037100  | 0.00000024  | 2.45559400  | 0.11047530  |
| 248787_at   | AT5G47420 | 4.20E-03 | 0.88619660  | -0.00000048 | 0.82837060  | 0.10079718  |
| 248766_at   | AT5G47580 | 8.04E-04 | 0.84059880  | 0.00000000  | 0.66839430  | -0.08989358 |
| 248765_at   | AT5G47650 | 5.05E-04 | -0.49014830 | 0.00000000  | -0.42741728 | -0.15530610 |
| 248769_at   | AT5G47730 | 3.66E-04 | 0.88929915  | 0.00000000  | 0.86008763  | 0.01658464  |
| 248775_at   | AT5G47850 | 1.61E-04 | 0.80305123  | 0.00000000  | 1.06741860  | -0.05465722 |
| 248719_at   | AT5G47910 | 1.46E-03 | 1.33887100  | -0.00000048 | 1.22659020  | 0.04294729  |
| 248726_at   | AT5G47960 | 1.47E-04 | 0.75367950  | 0.00000024  | 0.79341245  | 0.22889805  |
| 248698_at   | AT5G48380 | 4.57E-04 | 1.64992140  | 0.00000048  | 1.69677260  | 0.25022173  |
| 248656_at   | AT5G48460 | 1.31E-03 | -0.78774405 | 0.00000000  | -0.83921385 | -0.24771404 |
| 248686_at   | AT5G48540 | 5.46E-04 | 2.55560300  | -0.00000048 | 2.21923110  | 0.01616526  |
| 248624_at   | AT5G48790 | 1.44E-03 | -0.86011505 | 0.00000048  | -1.22943450 | -0.07117701 |
| 248615_at   | AT5G49570 | 2.66E-03 | 1.41946320  | -0.00000024 | 1.20880370  | 0.15009070  |
| 248562_at   | AT5G49680 | 2.20E-04 | 0.86555960  | 0.00000000  | 0.50047590  | -0.15135312 |
| 248574_at   | AT5G49830 | 2.14E-03 | 0.45256567  | -0.00000048 | 0.44689655  | 0.03715515  |
| 248580_at   | AT5G49890 | 1.62E-03 | 0.23571491  | 0.00000048  | 0.23171377  | -0.04096651 |
| 248531_at   | AT5G49950 | 2.98E-03 | 0.41068697  | 0.00000024  | 0.41622830  | 0.04704332  |
| 248547_at   | AT5G50280 | 3.06E-03 | -0.65208983 | -0.00000024 | -0.63484170 | 0.21305513  |
| 248521_s_at | AT5G50520 | 2.55E-03 | 0.60360480  | 0.00000048  | 0.47956753  | -0.25945997 |
| 248523_s_at | AT5G50580 | 3.27E-03 | -0.41817617 | 0.00000000  | -0.28325891 | -0.04751110 |
| 248442_at   | AT5G51280 | 1.65E-03 | 0.49818230  | -0.00000048 | 0.43721914  | 0.03550911  |
| 248409_at   | AT5G51540 | 1.12E-04 | -0.73214960 | -0.00000048 | -0.72571470 | -0.11160040 |
| 248422_at   | AT5G51640 | 2.01E-03 | 0.80177450  | 0.00000000  | 0.68063736  | -0.03040171 |
| 248426_at   | AT5G51740 | 3.31E-04 | 0.60438013  | 0.00000000  | 0.74798630  | -0.06539202 |
| 248381_at   | AT5G51830 | 1.65E-03 | 1.30708890  | 0.00000024  | 1.27942610  | 0.08224344  |
| 248402_at   | AT5G52100 | 6.67E-04 | -1.00544330 | 0.00000000  | -1.02498580 | 0.09705210  |
| 248346_at   | AT5G52210 | 9.34E-04 | 0.30822754  | 0.00000024  | 0.27930164  | -0.24540377 |
| 248349_at   | AT5G52240 | 4.28E-03 | 0.48667860  | 0.00000000  | 0.52788734  | 0.05772638  |
| 248336_at   | AT5G52420 | 7.43E-05 | -0.69049170 | 0.00000000  | -0.66705940 | 0.27408028  |
| 248338_at   | AT5G52440 | 2.95E-03 | -0.76854470 | -0.00000048 | -0.70584726 | -0.08831167 |
| 248313_at   | AT5G52580 | 2.59E-03 | 0.42308950  | 0.00000000  | 0.46447563  | -0.12586069 |
| 248332_at   | AT5G52640 | 1.75E-04 | 2.58598330  | -0.00000024 | 2.09115740  | -0.30512810 |
| 248327_at   | AT5G52750 | 6.15E-04 | 2.52641250  | 0.00000024  | 2.33535480  | -0.23067951 |
| 248322_at   | AT5G52760 | 1.00E-03 | 3.37972700  | 0.00000000  | 3.45464180  | 0.25401950  |
| 248330_at   | AT5G52810 | 1.53E-03 | 2.85455800  | 0.00000024  | 2.89220570  | 0.33065915  |
| 248285_at   | AT5G52960 | 3.29E-03 | -0.65313053 | -0.00000048 | -0.66614676 | 0.08856773  |
| 248287_at   | AT5G52970 | 5.01E-05 | -1.04513500 | 0.00000000  | -1.01498170 | 0.13652611  |

|             |           |          |             |             |             |             |
|-------------|-----------|----------|-------------|-------------|-------------|-------------|
| 248298_at   | AT5G53110 | 1.76E-03 | 1.04356170  | 0.00000000  | 1.23761700  | 0.18713236  |
| 248224_at   | AT5G53490 | 4.28E-03 | -0.78054047 | 0.00000000  | -0.83753586 | 0.04026890  |
| 248242_at   | AT5G53580 | 1.24E-03 | -0.71943570 | -0.00000048 | -0.64325476 | 0.19051409  |
| 248235_at   | AT5G53860 | 4.34E-05 | -0.65127230 | 0.00000000  | -0.38173485 | 0.28460120  |
| 248192_at   | AT5G54140 | 2.42E-03 | 0.63134980  | 0.00000024  | 0.63776230  | -0.26347065 |
| 248181_at   | AT5G54290 | 1.17E-03 | -0.33745670 | 0.00000048  | -0.50698710 | -0.06608772 |
| 248164_at   | AT5G54490 | 5.03E-05 | 2.36441200  | 0.00000024  | 2.23795700  | 0.07663822  |
| 248169_at   | AT5G54610 | 4.57E-04 | 2.59593200  | 0.00000024  | 2.46999300  | -0.11624646 |
| 248131_at   | AT5G54830 | 3.21E-03 | 0.29378033  | 0.00000000  | 0.40958643  | 0.03498626  |
| 248132_at   | AT5G54840 | 3.59E-03 | 1.06597190  | 0.00000000  | 0.66891384  | -0.28862453 |
| 248134_at   | AT5G54860 | 7.59E-04 | 1.82532980  | 0.00000048  | 1.59943870  | -0.17363548 |
| 248108_at   | AT5G55130 | 1.26E-03 | 0.55056430  | 0.00000000  | 0.53512480  | -0.14410925 |
| 248092_at   | AT5G55170 | 7.93E-04 | 1.45379730  | 0.00000000  | 1.25479510  | -0.38471174 |
| 248058_at   | AT5G55530 | 2.40E-03 | 0.39367342  | -0.00000048 | 0.45463657  | 0.14053822  |
| 248068_at   | AT5G55610 | 3.81E-03 | 0.98152830  | 0.00000048  | 1.09798430  | 0.42139053  |
| 248037_at   | AT5G55930 | 2.32E-03 | 0.67086697  | 0.00000000  | 0.67882110  | -0.27631617 |
| 248042_at   | AT5G55960 | 5.73E-04 | -0.55316734 | 0.00000000  | -0.41453838 | 0.20520020  |
| 248007_at   | AT5G56260 | 1.63E-03 | 0.85735035  | 0.00000048  | 0.85956097  | 0.21777344  |
| 247966_at   | AT5G56610 | 1.18E-03 | 0.94839644  | 0.00000024  | 0.79331780  | 0.12129664  |
| 247936_at   | AT5G57030 | 2.80E-03 | -0.34779167 | 0.00000048  | -0.42540407 | 0.27811003  |
| 247949_at   | AT5G57220 | 3.50E-03 | 3.28715660  | 0.00000000  | 2.68311880  | -0.16887927 |
| 247848_at   | AT5G58120 | 1.48E-03 | 1.14295410  | 0.00000024  | 1.37432980  | -0.14026070 |
| 247858_at   | AT5G58220 | 2.00E-03 | 0.59993840  | 0.00000000  | 0.49433756  | -0.20662403 |
| 247816_at   | AT5G58260 | 2.27E-03 | -1.04243610 | 0.00000000  | -1.25596860 | 0.08558893  |
| 247740_at   | AT5G58940 | 3.51E-04 | 1.43252610  | 0.00000000  | 1.45309020  | 0.13762140  |
| 247760_at   | AT5G59130 | 3.92E-03 | -0.93391680 | 0.00000000  | -0.82224345 | -0.09652710 |
| 247721_at   | AT5G59140 | 7.35E-04 | 0.49915123  | 0.00000000  | 0.48214626  | -0.13142347 |
| 247716_at   | AT5G59350 | 1.28E-03 | -0.86998770 | -0.00000048 | -0.57134030 | 0.17007160  |
| 247618_at   | AT5G60280 | 1.19E-05 | 1.99756500  | 0.00000000  | 1.68360520  | -0.04690695 |
| 247594_at   | AT5G60800 | 5.31E-04 | 1.46523100  | 0.00000024  | 1.54622410  | -0.45229006 |
| 247604_at   | AT5G60950 | 1.49E-03 | 1.98747870  | -0.00000024 | 1.95397420  | -0.36725855 |
| 247554_at   | AT5G61010 | 1.56E-05 | 1.51339480  | 0.00000000  | 1.50389000  | 0.03489661  |
| 247556_at   | AT5G61040 | 3.33E-03 | -0.30093740 | 0.00000024  | -0.28707004 | 0.10465717  |
| 247564_at   | AT5G61140 | 2.76E-03 | 0.16837835  | -0.00000024 | 0.17153430  | -0.03258896 |
| 247573_at   | AT5G61160 | 1.43E-03 | 3.35763120  | 0.00000024  | 2.53427170  | -0.13627195 |
| 247529_at   | AT5G61520 | 2.61E-03 | 1.11980340  | 0.00000000  | 0.86553144  | 0.00378037  |
| 247493_at   | AT5G61900 | 2.81E-05 | 1.73136000  | -0.00000024 | 1.59369750  | -0.00154638 |
| 247461_at   | AT5G62100 | 3.00E-04 | -0.39873457 | 0.00000000  | -0.44780684 | -0.12762380 |
| 247486_at   | AT5G62140 | 4.63E-04 | -1.18220160 | 0.00000000  | -1.06458710 | 0.27414465  |
| 247478_at   | AT5G62360 | 1.72E-03 | -1.11128140 | 0.00000048  | -0.90370846 | -0.21894836 |
| 247427_at   | AT5G62580 | 3.08E-04 | -0.44414950 | 0.00000000  | -0.29238940 | 0.04090309  |
| 247439_at   | AT5G62670 | 6.05E-04 | -1.02564290 | 0.00000048  | -1.16690160 | -0.05327463 |
| 247401_at   | AT5G62790 | 3.62E-04 | -0.64317894 | 0.00000048  | -0.43561792 | 0.24347400  |
| 247422_at   | AT5G62810 | 1.45E-03 | -0.38049412 | 0.00000000  | -0.23133612 | -0.02769041 |
| 247418_at   | AT5G63030 | 2.37E-03 | 0.73555994  | -0.00000048 | 0.67719220  | -0.00977898 |
| 247389_at   | AT5G63490 | 1.79E-03 | 0.94878197  | 0.00000000  | 1.07072210  | 0.23466635  |
| 247338_at   | AT5G63680 | 2.48E-03 | 1.85437110  | 0.00000000  | 1.62341830  | 0.38692093  |
| 247347_at   | AT5G63780 | 3.96E-05 | -1.53823280 | 0.00000000  | -1.32207680 | -0.03734398 |
| 247314_at   | AT5G64000 | 4.78E-04 | 2.71046160  | 0.00000000  | 2.78803160  | 0.20324564  |
| 247287_at   | AT5G64230 | 3.69E-03 | -0.66266180 | 0.00000024  | -0.49950410 | -0.31467152 |
| 247285_at   | AT5G64400 | 1.54E-03 | 0.92394020  | 0.00000000  | 0.76427030  | 0.04211998  |
| 247293_at   | AT5G64510 | 3.08E-04 | 2.62384220  | -0.00000024 | 2.52183720  | 0.35806656  |
| 247214_at   | AT5G64850 | 2.69E-03 | -1.11423970 | 0.00000000  | -1.11319300 | -0.03127527 |
| 247216_at   | AT5G64860 | 3.17E-03 | -1.02123830 | 0.00000000  | -0.86352970 | -0.13586044 |
| 247208_at   | AT5G64870 | 1.08E-03 | 0.85410810  | 0.00000000  | 0.61707160  | -0.16174603 |
| 247215_at   | AT5G64905 | 2.25E-03 | 1.50585460  | -0.00000024 | 1.05160070  | -0.15820813 |
| 247228_at   | AT5G65140 | 2.79E-04 | 1.24835060  | 0.00000000  | 1.10436300  | 0.28031445  |
| 247201_at   | AT5G65220 | 3.53E-03 | -0.48779440 | 0.00000000  | -0.43802547 | 0.07526350  |
| 247145_at   | AT5G65600 | 2.50E-03 | 0.97133830  | -0.00000024 | 0.71196030  | -0.20170999 |
| 247080_at   | AT5G66140 | 3.53E-03 | 0.72628546  | 0.00000000  | 0.93067360  | 0.30782747  |
| 247100_at   | AT5G66520 | 1.05E-03 | -1.35016010 | 0.00000000  | -1.35169170 | 0.02734375  |
| 247071_at   | AT5G66640 | 2.04E-04 | 1.61797570  | 0.00000000  | 1.62842300  | -0.13027048 |
| 247069_at   | AT5G66920 | 2.17E-04 | -0.57872176 | -0.00000048 | -0.46630670 | 0.04412317  |
| 247034_at   | AT5G67260 | 3.85E-03 | -0.77406645 | 0.00000000  | -0.71698380 | 0.10928011  |
| 246984_at   | AT5G67310 | 7.66E-04 | 2.84720040  | -0.00000024 | 2.00131250  | -0.06844091 |
| 246988_at   | AT5G67340 | 4.95E-04 | 2.21562900  | -0.00000024 | 2.17448040  | -0.03453255 |
| 246998_at   | AT5G67370 | 5.80E-04 | -0.63876677 | 0.00000048  | -0.76495886 | 0.47351074  |
| 246996_at   | AT5G67420 | 1.77E-03 | -0.21533775 | -0.00000048 | -0.44110012 | 0.15643406  |
| 246993_at   | AT5G67450 | 3.41E-04 | 2.06582070  | 0.00000000  | 1.85523410  | 0.13921952  |
| 266212_at   |           | 3.88E-03 | -0.24562263 | 0.00000000  | -0.19935298 | -0.07526517 |
| 265526_x_at |           | 1.92E-03 | -0.19553232 | -0.00000024 | -0.34177970 | -0.04725266 |
| 264824_at   |           | 1.83E-04 | -0.67472935 | -0.00000048 | -0.50309370 | 0.13993359  |
| 264270_at   |           | 8.28E-05 | -0.53365517 | -0.00000024 | -0.48614025 | 0.10819769  |
| 245491_at   |           | 5.01E-04 | -0.21962023 | 0.00000024  | -0.01723218 | 0.08527494  |
| 245079_at   |           | 2.57E-03 | 0.27364420  | 0.00000000  | 0.08985543  | -0.18751812 |

# Notes : Created from Advanced Analysis operation: significance Analysis. Genespring GX.

#Entitylist : Filtered on Expression (20.0 - 100.0)th Percentile in the Raw Data

#Interpretation : genotype - Treatment

#Experiment: arr345689 Hpa

#p-value cut-off:0.05

#Selected Test : 2way ANOVA

#p-value computation: Asymptotic

#Multiple Testing Correction: Benjamini-Hochberg

# Technology : Affymetrix.GeneChip.ATH1-121501
